# Supplementary material for: Conjugates of Tacrine and Salicylic Acid Derivatives as New Promising Multitarget Agents for Alzheimer’s Disease
Source: MDPI journal article supplement (doi:10.3390/ijms24032285), 2023-01-24
Supplement: s1 [file s1]

# Conjugates of Tacrine and Salicylic Acid Derivatives as New Promising Multitarget Agents for Alzheimer's Disease

Galina F. Makhaeva <sup>1</sup>, Nadezhda V. Kovaleva <sup>1</sup>, Elena V. Rudakova <sup>1</sup>, Natalia P. Boltneva <sup>1</sup>, Maria V. Grishchenko <sup>2</sup>, Sofya V. Lushchekina <sup>1,3</sup>, Tatiana Y. Astakhova <sup>3</sup>, Olga G. Serebryakova <sup>1</sup>, Elena N. Timokhina <sup>3</sup>, Ekaterina F. Zhilina <sup>2</sup>, Evgeny V. Shchegolkov <sup>2</sup>, Mariya V. Ulitko <sup>4</sup>, Eugene V. Radchenko <sup>1,5</sup>, Vladimir A. Palyulin <sup>1,5</sup>, Yanina V. Burgart <sup>2</sup>, Victor I. Saloutin <sup>2</sup>, Sergey O. Bachurin <sup>1</sup> and Rudy J. Richardson <sup>6,7,8,9,\*</sup>

<sup>1</sup> Institute of Physiologically Active Compounds at Federal Research Center of Problems of Chemical Physics and Medicinal Chemistry, Russian Academy of Sciences, Chernogolovka 142432, Russia

<sup>2</sup> Postovsky Institute of Organic Synthesis, Urals Branch of Russian Academy of Sciences, Yekaterinburg 620990, Russia

<sup>3</sup> Emanuel Institute of Biochemical Physics Russian Academy of Sciences, Moscow 119334, Russia

<sup>4</sup> Institute of Natural Sciences and Mathematics of the Ural Federal University Named after the First President of Russia B. N. Yeltsin, Ekaterinburg 620083, Russia

<sup>5</sup> Department of Chemistry, Lomonosov Moscow State University, Moscow 119991, Russia

<sup>6</sup> Department of Environmental Health Sciences, University of Michigan, Ann Arbor, MI 48109, USA

<sup>7</sup> Department of Neurology, University of Michigan, Ann Arbor, MI 48109, USA

<sup>8</sup> Center of Computational Medicine and Bioinformatics, University of Michigan, Ann Arbor, MI 48109, USA

<sup>9</sup> Michigan Institute for Computational Discovery and Engineering, University of Michigan, Ann Arbor, MI 48109, USA

\* Correspondence: rjrich@umich.edu; Tel.: +1-734-936-0769

## Table of contents

|                                                              |    |
|--------------------------------------------------------------|----|
| Figure S1. IR spectrum of compound 6a .....                  | 4  |
| Figure S2. <sup>1</sup> H NMR spectrum of compound 6a.....   | 5  |
| Figure S3. <sup>13</sup> C NMR spectrum of compound 6a.....  | 6  |
| Figure S4. IR spectrum of compound 6b .....                  | 8  |
| Figure S5. <sup>1</sup> H NMR spectrum of compound 6b .....  | 9  |
| Figure S6. <sup>13</sup> C NMR spectrum of compound 6b ..... | 10 |
| Figure S7. IR spectrum of compound 6c .....                  | 12 |
| Figure S8. <sup>1</sup> H NMR spectrum of compound 6c.....   | 13 |
| Figure S9. <sup>13</sup> C NMR spectrum of compound 6c.....  | 14 |
| Figure S10. HRMS spectrum of compound 6c.....                | 15 |
| Figure S11. IR spectrum of compound 7a .....                 | 16 |
| Figure S12. <sup>1</sup> H NMR spectrum of compound 7a ..... | 17 |
| Figure S13. <sup>13</sup> C NMR spectrum of compound 7a..... | 18 |
| Figure S14. <sup>19</sup> F NMR spectrum of compound 7a..... | 19 |
| Figure S15. HMRS spectrum of compound 7a .....               | 20 |
| Figure S16. IR spectrum of compound 7b .....                 | 21 |
| Figure S17. <sup>1</sup> H NMR spectrum of compound 7b ..... | 22 |

|                                                                                                                                                                                                                                 |    |
|---------------------------------------------------------------------------------------------------------------------------------------------------------------------------------------------------------------------------------|----|
| <b>Figure S18.</b> $^{13}\text{C}$ NMR spectrum of compound <b>7b</b> .....                                                                                                                                                     | 23 |
| <b>Figure S19.</b> $^{19}\text{F}$ NMR spectrum of compound <b>7b</b> .....                                                                                                                                                     | 24 |
| <b>Figure S20.</b> HRMS spectrum of compound <b>7b</b> .....                                                                                                                                                                    | 25 |
| <b>Figure S21.</b> IR spectrum of compound <b>7c</b> .....                                                                                                                                                                      | 26 |
| <b>Figure S22.</b> $^1\text{H}$ NMR spectrum of compound <b>7c</b> .....                                                                                                                                                        | 27 |
| <b>Figure S23.</b> $^{13}\text{C}$ NMR spectrum of compound <b>7c</b> .....                                                                                                                                                     | 28 |
| <b>Figure S24.</b> $^{19}\text{F}$ NMR spectrum of compound <b>7c</b> .....                                                                                                                                                     | 29 |
| <b>Figure S25.</b> HMRS spectrum of compound <b>7c</b> .....                                                                                                                                                                    | 30 |
| <b>Figure S26.</b> IR spectrum of compound <b>8a</b> .....                                                                                                                                                                      | 31 |
| <b>Figure S26.</b> $^1\text{H}$ NMR spectrum of compound <b>8a</b> .....                                                                                                                                                        | 32 |
| <b>Figure S27.</b> $^{13}\text{C}$ NMR spectrum of compound <b>8a</b> .....                                                                                                                                                     | 33 |
| <b>Figure S28.</b> $^{19}\text{F}$ NMR spectrum of compound <b>8a</b> .....                                                                                                                                                     | 34 |
| <b>Figure S29.</b> HRMS spectrum of compound <b>8a</b> .....                                                                                                                                                                    | 35 |
| <b>Figure S30.</b> IR spectrum of compound <b>8b</b> .....                                                                                                                                                                      | 36 |
| <b>Figure S31.</b> $^1\text{H}$ NMR spectrum of compound <b>8b</b> .....                                                                                                                                                        | 37 |
| <b>Figure S33.</b> $^{13}\text{C}$ NMR spectrum of compound <b>8b</b> .....                                                                                                                                                     | 38 |
| <b>Figure S34.</b> $^{19}\text{F}$ NMR spectrum of compound <b>8b</b> .....                                                                                                                                                     | 39 |
| <b>Figure S35.</b> HRMS spectrum of compound <b>8b</b> .....                                                                                                                                                                    | 40 |
| <b>Figure S36.</b> IR spectrum of compound <b>8c</b> .....                                                                                                                                                                      | 41 |
| <b>Figure S37.</b> $^1\text{H}$ NMR spectrum of compound <b>8c</b> .....                                                                                                                                                        | 42 |
| <b>Figure S38.</b> $^{13}\text{C}$ NMR spectrum of compound <b>8c</b> .....                                                                                                                                                     | 43 |
| <b>Figure S39.</b> $^{19}\text{F}$ NMR spectrum of compound <b>8c</b> .....                                                                                                                                                     | 44 |
| <b>Figure S40.</b> HRMS spectrum of compound <b>8c</b> .....                                                                                                                                                                    | 45 |
| <b>Figure S41.</b> IR spectrum of compound <b>10a</b> .....                                                                                                                                                                     | 46 |
| <b>Figure S42.</b> $^1\text{H}$ NMR spectrum of compound <b>10a</b> .....                                                                                                                                                       | 47 |
| <b>Figure S43.</b> $^{13}\text{C}$ NMR spectrum of compound <b>10a</b> .....                                                                                                                                                    | 48 |
| <b>Figure S44.</b> HRMS spectrum of compound <b>10a</b> .....                                                                                                                                                                   | 49 |
| <b>Figure S45.</b> IR spectrum of compound <b>10b</b> .....                                                                                                                                                                     | 50 |
| <b>Figure S46.</b> $^1\text{H}$ NMR spectrum of compound <b>10b</b> .....                                                                                                                                                       | 51 |
| <b>Figure S47.</b> $^{13}\text{C}$ NMR spectrum of compound <b>10b</b> .....                                                                                                                                                    | 52 |
| <b>Figure S48.</b> HMRS spectrum of compound <b>10b</b> .....                                                                                                                                                                   | 53 |
| <b>Figure S49.</b> IR spectrum of compound <b>10c</b> .....                                                                                                                                                                     | 54 |
| <b>Figure S50.</b> $^1\text{H}$ NMR spectrum of compound <b>10c</b> .....                                                                                                                                                       | 55 |
| <b>Figure S51.</b> $^{13}\text{C}$ NMR spectrum of compound <b>10c</b> .....                                                                                                                                                    | 56 |
| <b>Figure S52.</b> HRMS spectrum of compound <b>10c</b> .....                                                                                                                                                                   | 57 |
| <b>Figure S53.</b> Absorption spectra of: compound <b>6b</b> , $\text{Cu}^{2+}$ ions solution, a sum of <b>6b</b> and $\text{Cu}^{2+}$ , their mixture, and the shift of the spectra caused by the formation of a complex. .... | 58 |
| <b>Figure S54.</b> UV spectra of compound <b>7b</b> and mixture of <b>7b</b> with $\text{Cu(II)}$ , $\text{Fe(II)}$ and $\text{Zn(II)}$ ions. ....                                                                              | 58 |

|                                                                                                                                                                                                                                                                                                                                                                                                                                             |    |
|---------------------------------------------------------------------------------------------------------------------------------------------------------------------------------------------------------------------------------------------------------------------------------------------------------------------------------------------------------------------------------------------------------------------------------------------|----|
| <b>Figure S55.</b> UV spectra of compound <b>8b</b> and mixture of <b>8b</b> with Cu(II), Fe(II) and Zn(II) ions. ....                                                                                                                                                                                                                                                                                                                      | 59 |
| <b>Figure S56.</b> UV spectra of compound <b>10b</b> and mixture of <b>10b</b> with Cu(II), Fe(II) and Zn(II) ions. ....                                                                                                                                                                                                                                                                                                                    | 59 |
| <b>Figure S57. (a)</b> UV absorption spectra of <b>6b</b> (20 $\mu$ M) in ethanol after addition of increasing concentrations of CuCl <sub>2</sub> (2-34 $\mu$ M). <b>(b)</b> the differential spectra due to 6b-Cu <sup>2+</sup> complex formation obtained by numerical subtraction from the spectra of the mixture of the spectra of the Cu <sup>2+</sup> alone and 6b alone at the corresponding concentrations. ....                   | 60 |
| <b>Figure S58. (a)</b> UV absorption spectra of <b>10b</b> (20 $\mu$ M) in ethanol after addition of increasing concentrations of CuCl <sub>2</sub> (2-34 $\mu$ M). <b>(b)</b> the differential spectra due to <b>10b</b> -Cu <sup>2+</sup> complex formation obtained by numerical subtraction from the spectra of the mixture of the spectra of the Cu <sup>2+</sup> alone and <b>10b</b> alone at the corresponding concentrations. .... | 60 |
| <b>Figure S59 .</b> IC <sub>50</sub> values for AChE inhibition by compounds <b>5c,6c,7c,8c</b> and <b>10c</b> (MEAN $\pm$ SEM, n = 3) .....                                                                                                                                                                                                                                                                                                | 61 |
| <b>Figure S60.</b> IC <sub>50</sub> values for BChE inhibition by compounds <b>5c,6c,7c,8c</b> and <b>10c</b> (MEAN $\pm$ SEM, n = 3) .....                                                                                                                                                                                                                                                                                                 | 62 |
| <b>Figure S61.</b> Lineweaver-Burk double-reciprocal plots of steady state inhibition of AChE by compounds <b>5c,6c,7c,8c</b> . Each plot indicates mixed-type inhibition. ....                                                                                                                                                                                                                                                             | 63 |
| <b>Figure S62.</b> Lineweaver-Burk double-reciprocal plots of steady state inhibition of BChE by compounds <b>5c,6c,7c,8c</b> . Each plot indicates mixed-type inhibition.....                                                                                                                                                                                                                                                              | 64 |
| <b>Table S1.</b> pKa values and charges of the investigated compounds.....                                                                                                                                                                                                                                                                                                                                                                  | 65 |

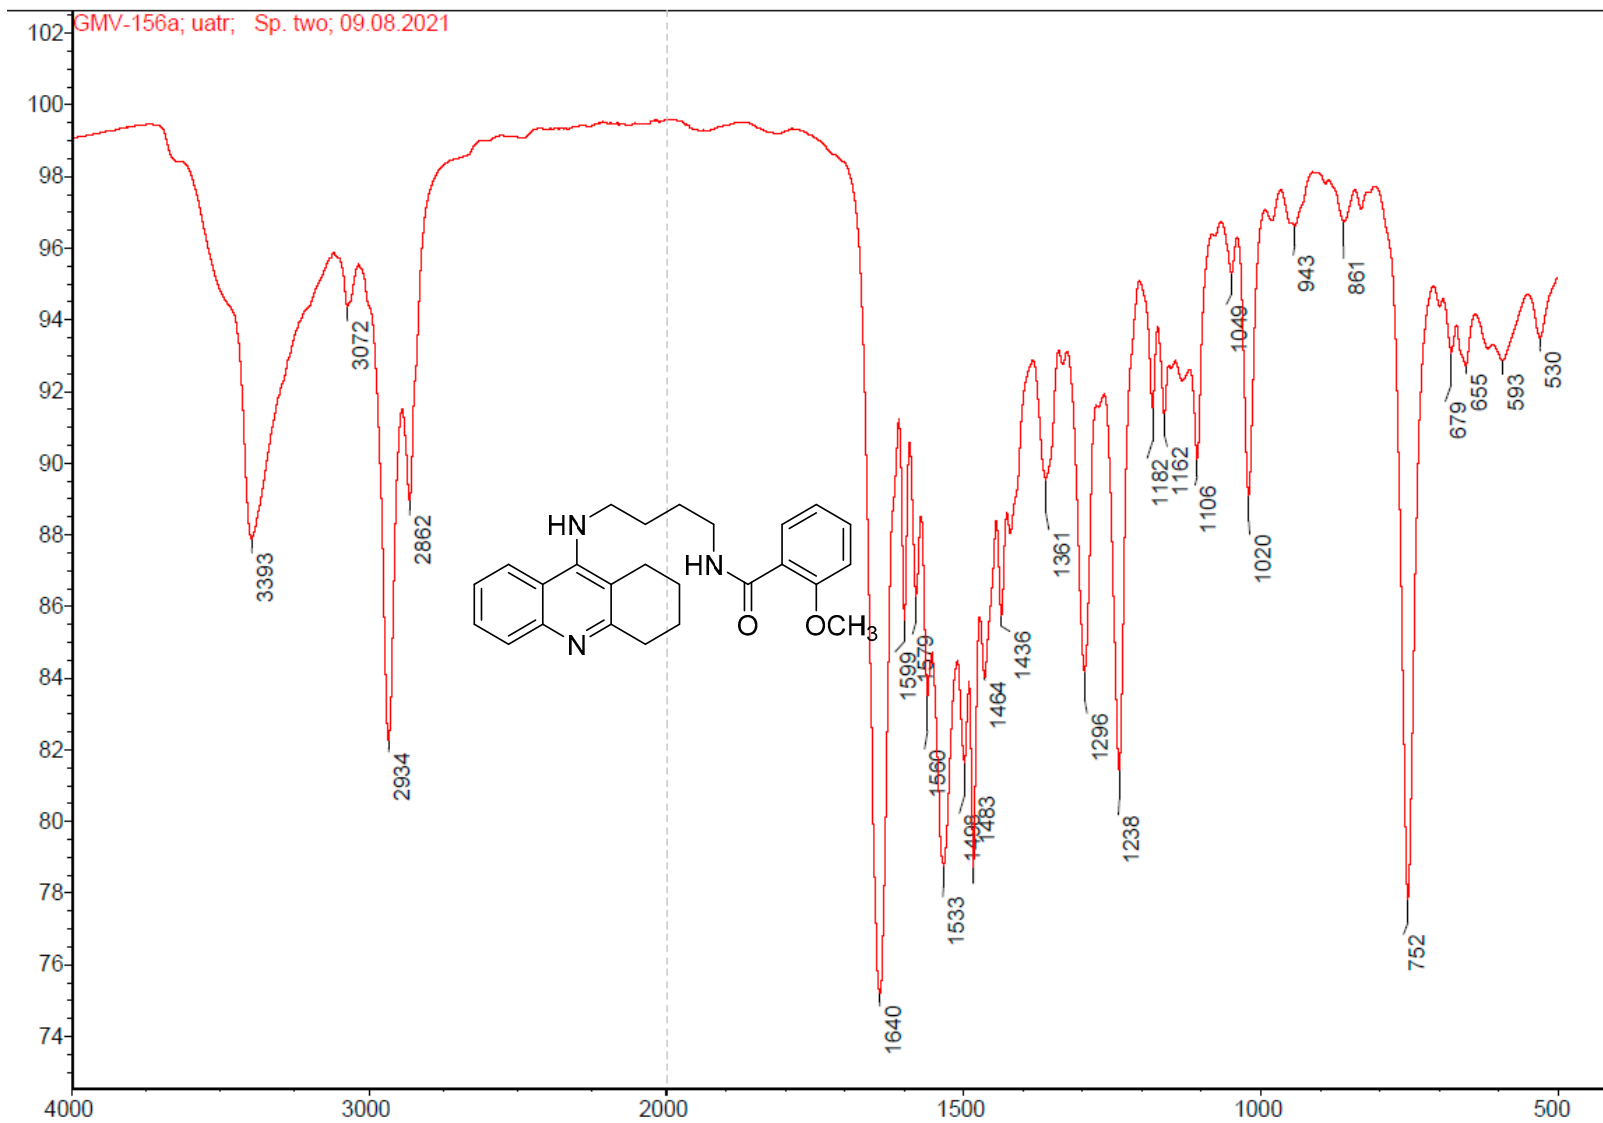

Figure S1. IR spectrum of compound 6a



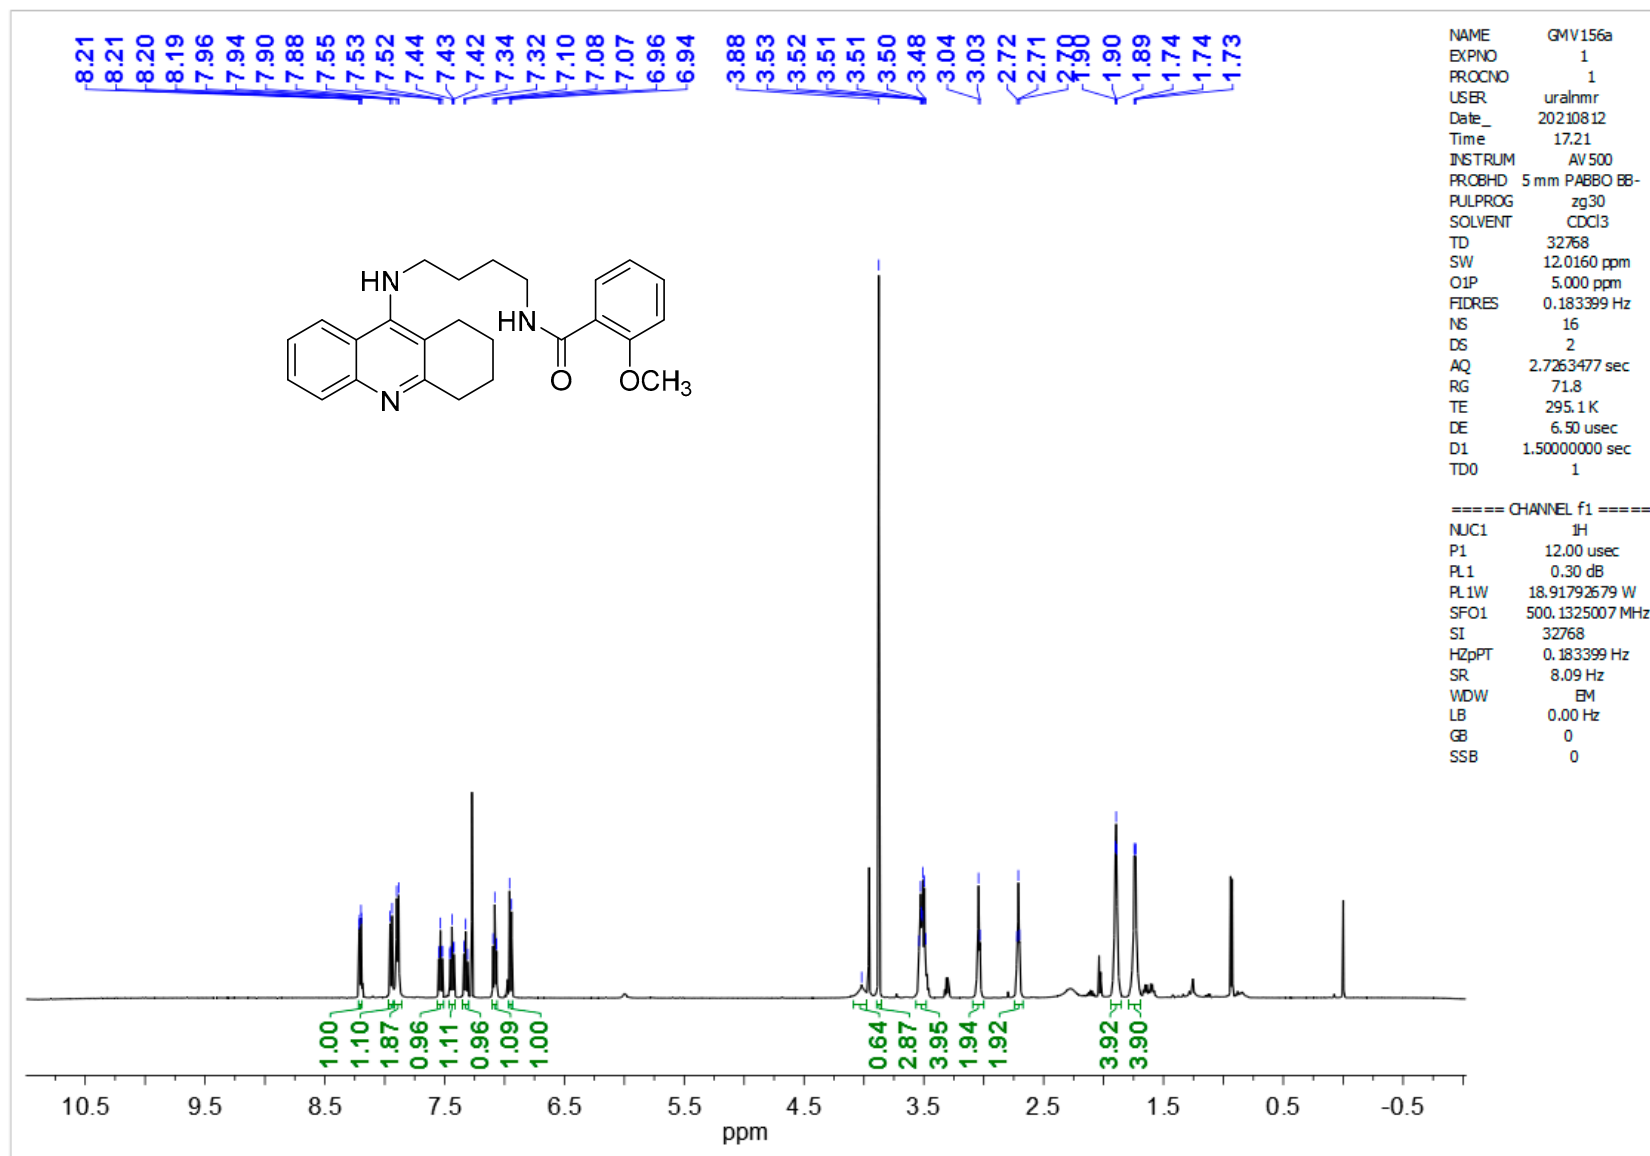

Figure S2. <sup>1</sup>H NMR spectrum of compound 6a

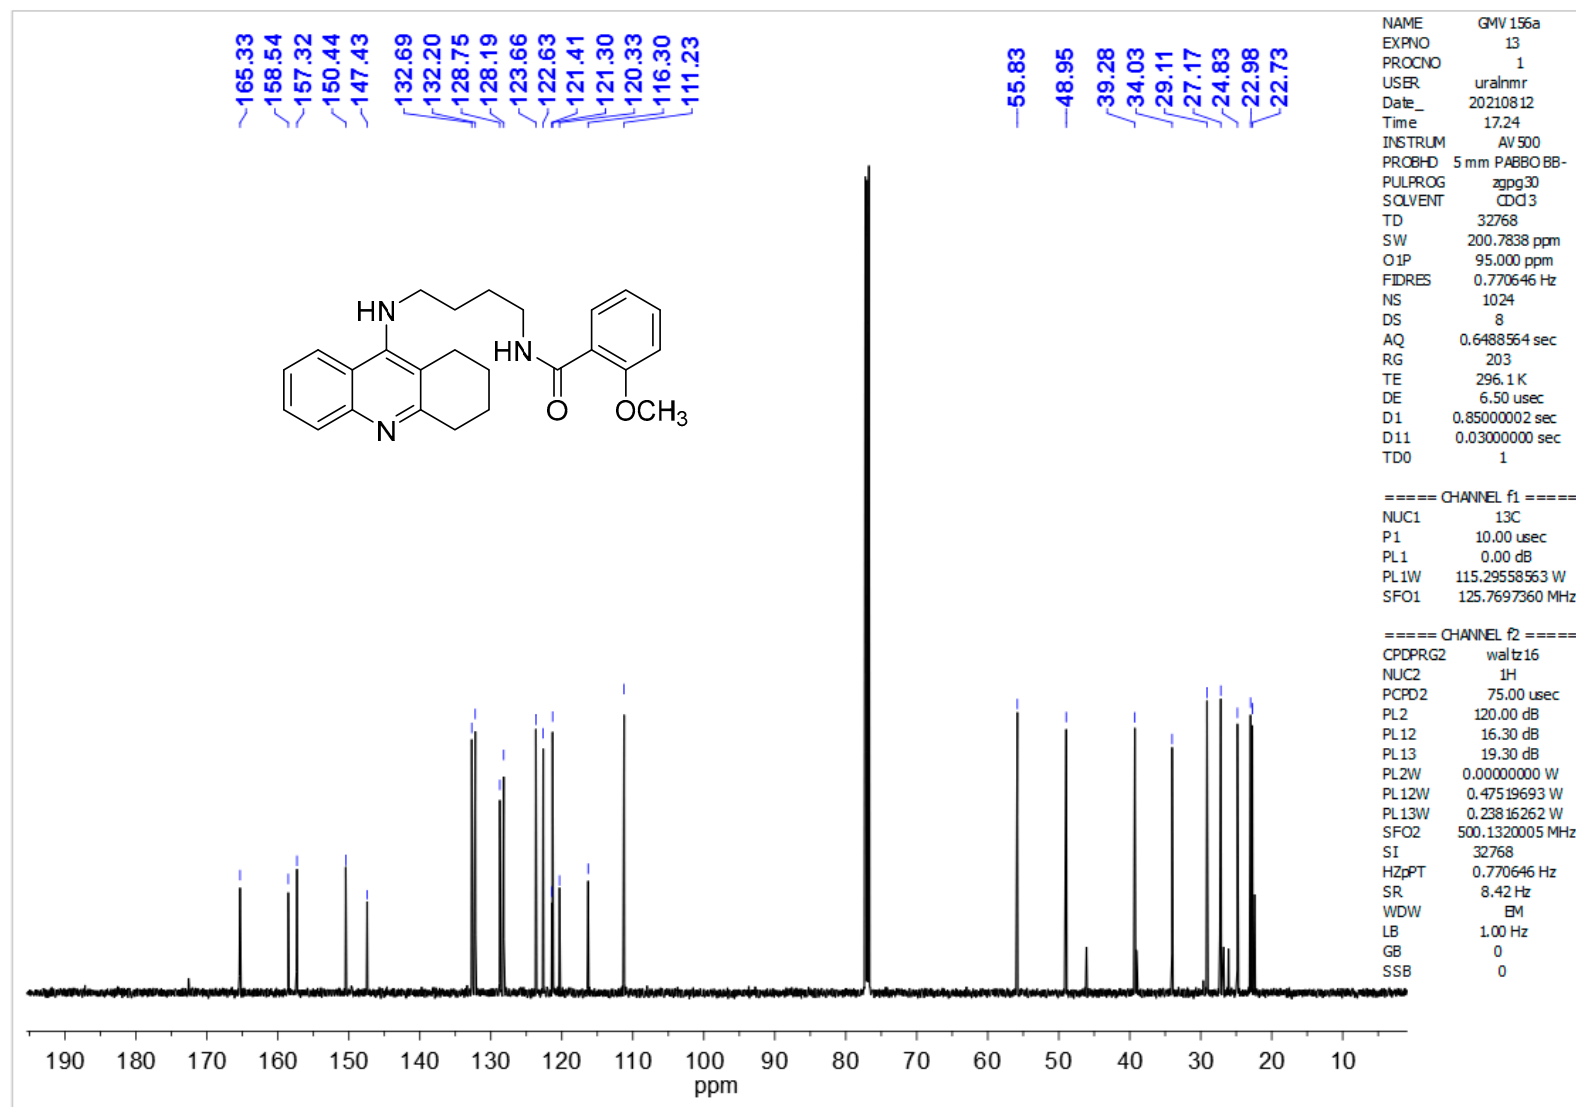

Figure S3. <sup>13</sup>C NMR spectrum of compound 6a

# Compound Spectrum SmartFormula Report

## Analysis Info

Analysis Name D:\Data\ING21\GMV-156a.22i-C.EP180.6219\_22i1315.d  
 Method EP180UI21HPC50-1600\_500-3500-0.4-4-200\_1f2002f200h Operator admin  
 Sample Name Instrument maXis impact 1819696.00172  
 Comment 22/09/2022: +Bckgnd: 118.09, 322.05, 622.03, 922.01, 1221.99, 1521.97, 1821.95, 2121.93, 2421.91, 2721.89 (G1969-85000; +/-299.981 HPC); other intense peaks (>2\*e4): 102.13 (NEt3); 132.91 (\*2-PrOH); 391.28&413.26 (DOP); 86.10, 113.13, 140.07, 149.02, 158.96, 167.03, 187.07, 194.10, 203.14, 207.17, 209.19, 214.25, 217.10, 223.21, 227.23, 237.22, 245.19, 249.22, 251.24, 255.27, 259.20, 263.23, 265.25, 273.22, 279.16, 291.27, 293.28, 304.30, 307.30, 321.31, 326.38, 332.33, 335.33, 349.35, 413.27, 1259.95, 1307.08, 1559.93: background (prev. analyzed samples and impurities); 188.09 (#6216); 588.32 (#6218)

## Acquisition Parameter

|             |          |                      |          |                  |           |
|-------------|----------|----------------------|----------|------------------|-----------|
| Source Type | ESI      | Ion Polarity         | Positive | Set Nebulizer    | 0.4 Bar   |
| Focus       | Active   | Set Capillary        | 3500 V   | Set Dry Heater   | 200 °C    |
| Scan Begin  | 50 m/z   | Set End Plate Offset | -500 V   | Set Dry Gas      | 4.0 l/min |
| Scan End    | 1600 m/z | Set Charging Voltage | 2000 V   | Set Divert Valve | Source    |
|             |          | Set Corona           | 0 nA     | Set APCI Heater  | 0 °C      |

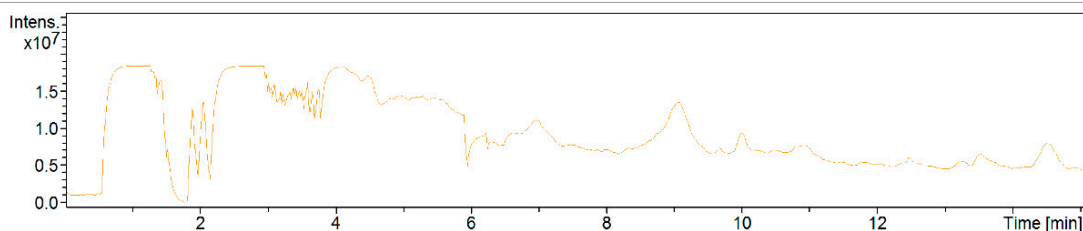

## +MS, 6.1-6.4min #353-367 (EQ Int.)

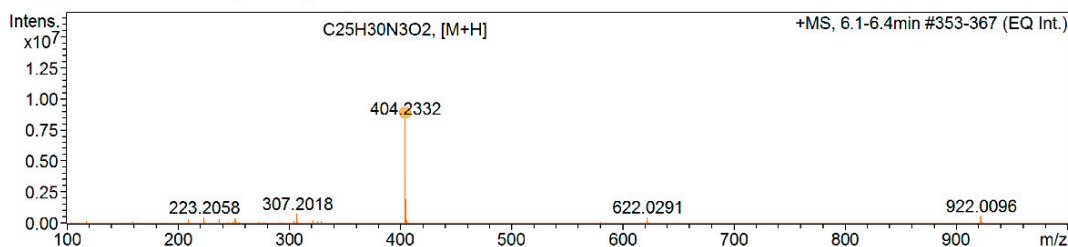

| Meas. m/z | # | Ion Formula | m/z      | err [ppm] | mSigma | # mSigma | Score  | rdb  | e <sup>-</sup> Conf | N-Rule |
|-----------|---|-------------|----------|-----------|--------|----------|--------|------|---------------------|--------|
| 404.2332  | 1 | C20H30N5O4  | 404.2292 | -9.9      | 4.2    | 1        | 37.77  | 8.5  | even                | ok     |
|           | 2 | C21H26N9    | 404.2306 | -6.6      | 16.2   | 2        | 91.58  | 13.5 | even                | ok     |
|           | 3 | C25H30N3O2  | 404.2333 | 0.1       | 30.2   | 3        | 100.00 | 12.5 | even                | ok     |

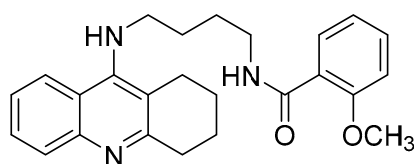

GMV-156a.22i-C.EP180.6219\_22i1315.d

Bruker Compass DataAnalysis 4.2

printed: 9/22/2021 2:11:25 PM

by: admin

Page 1 of 1

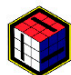

Institute of Organic Synthesis UB RAS  
 22 S.Kovalevskoy, 20 Akademicheskaya str, Yekaterinburg, Russian Federation  
 Phone: +7 (343) 362-34-56

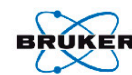

Figure S4. HMRS spectrum of compound 6a

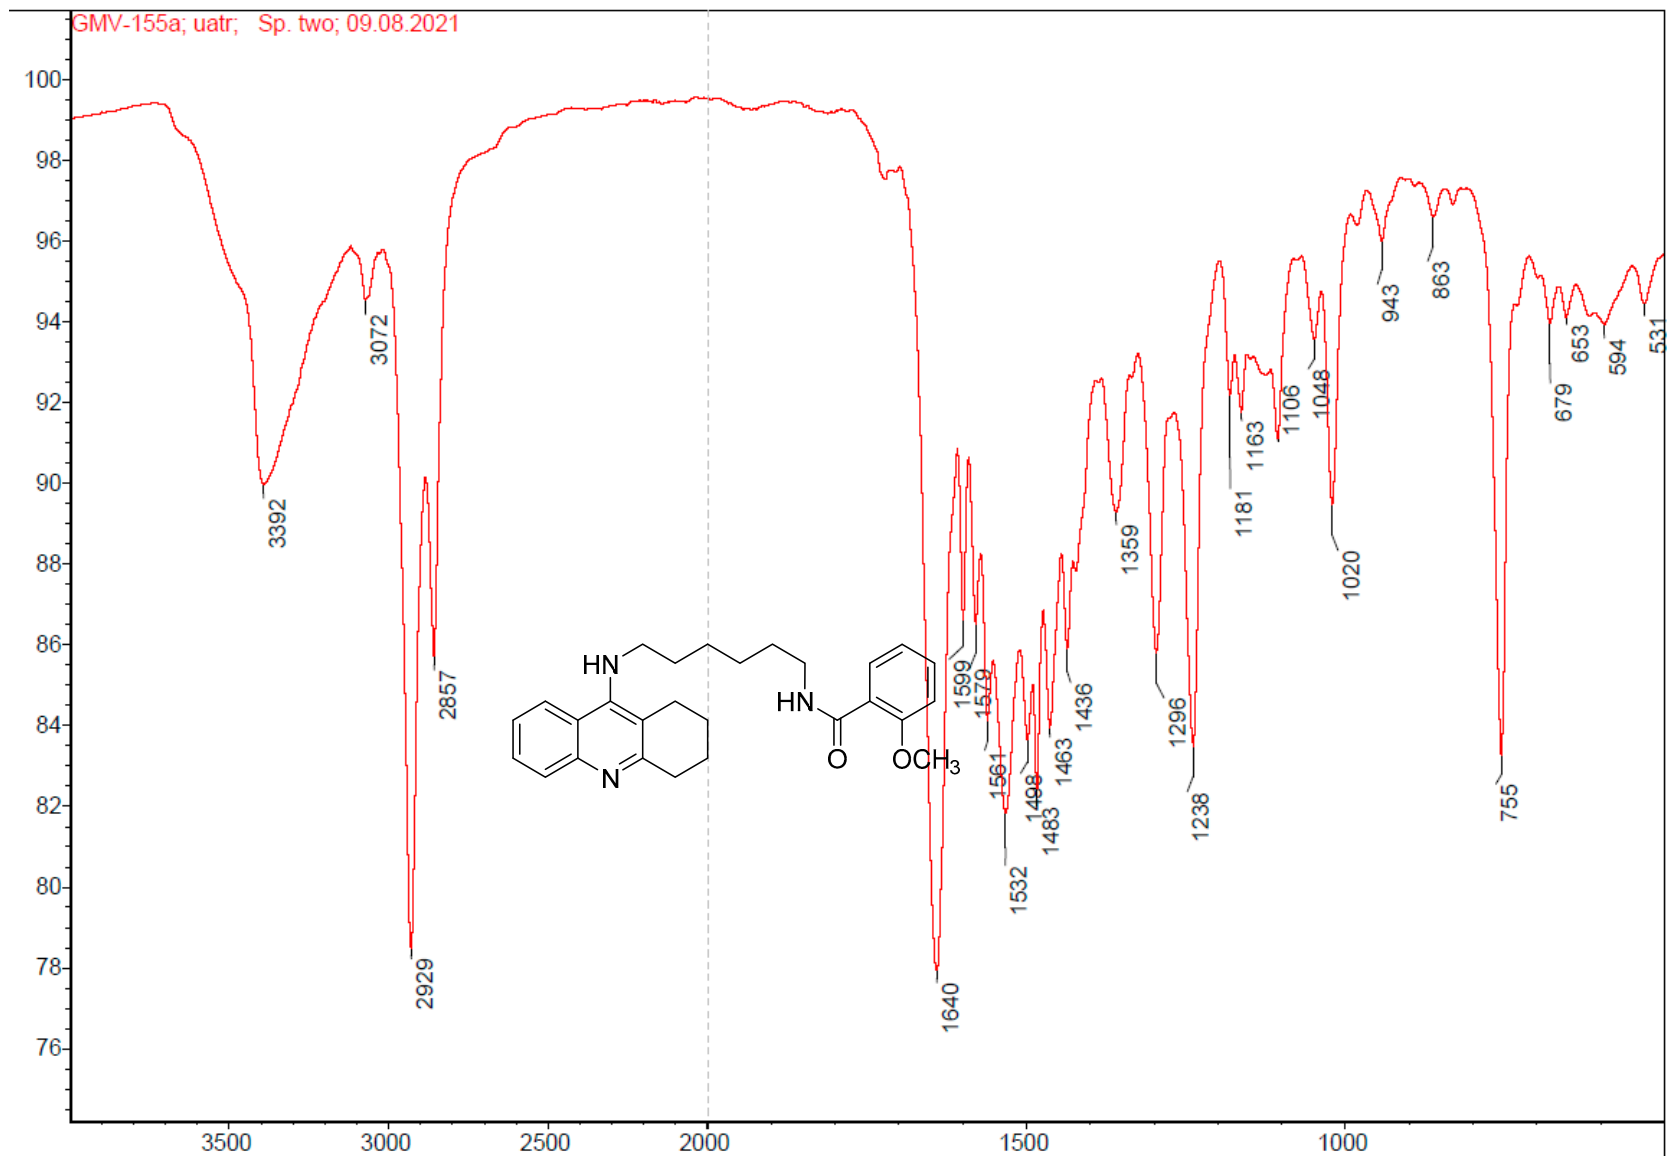

Figure S4. IR spectrum of compound 6b

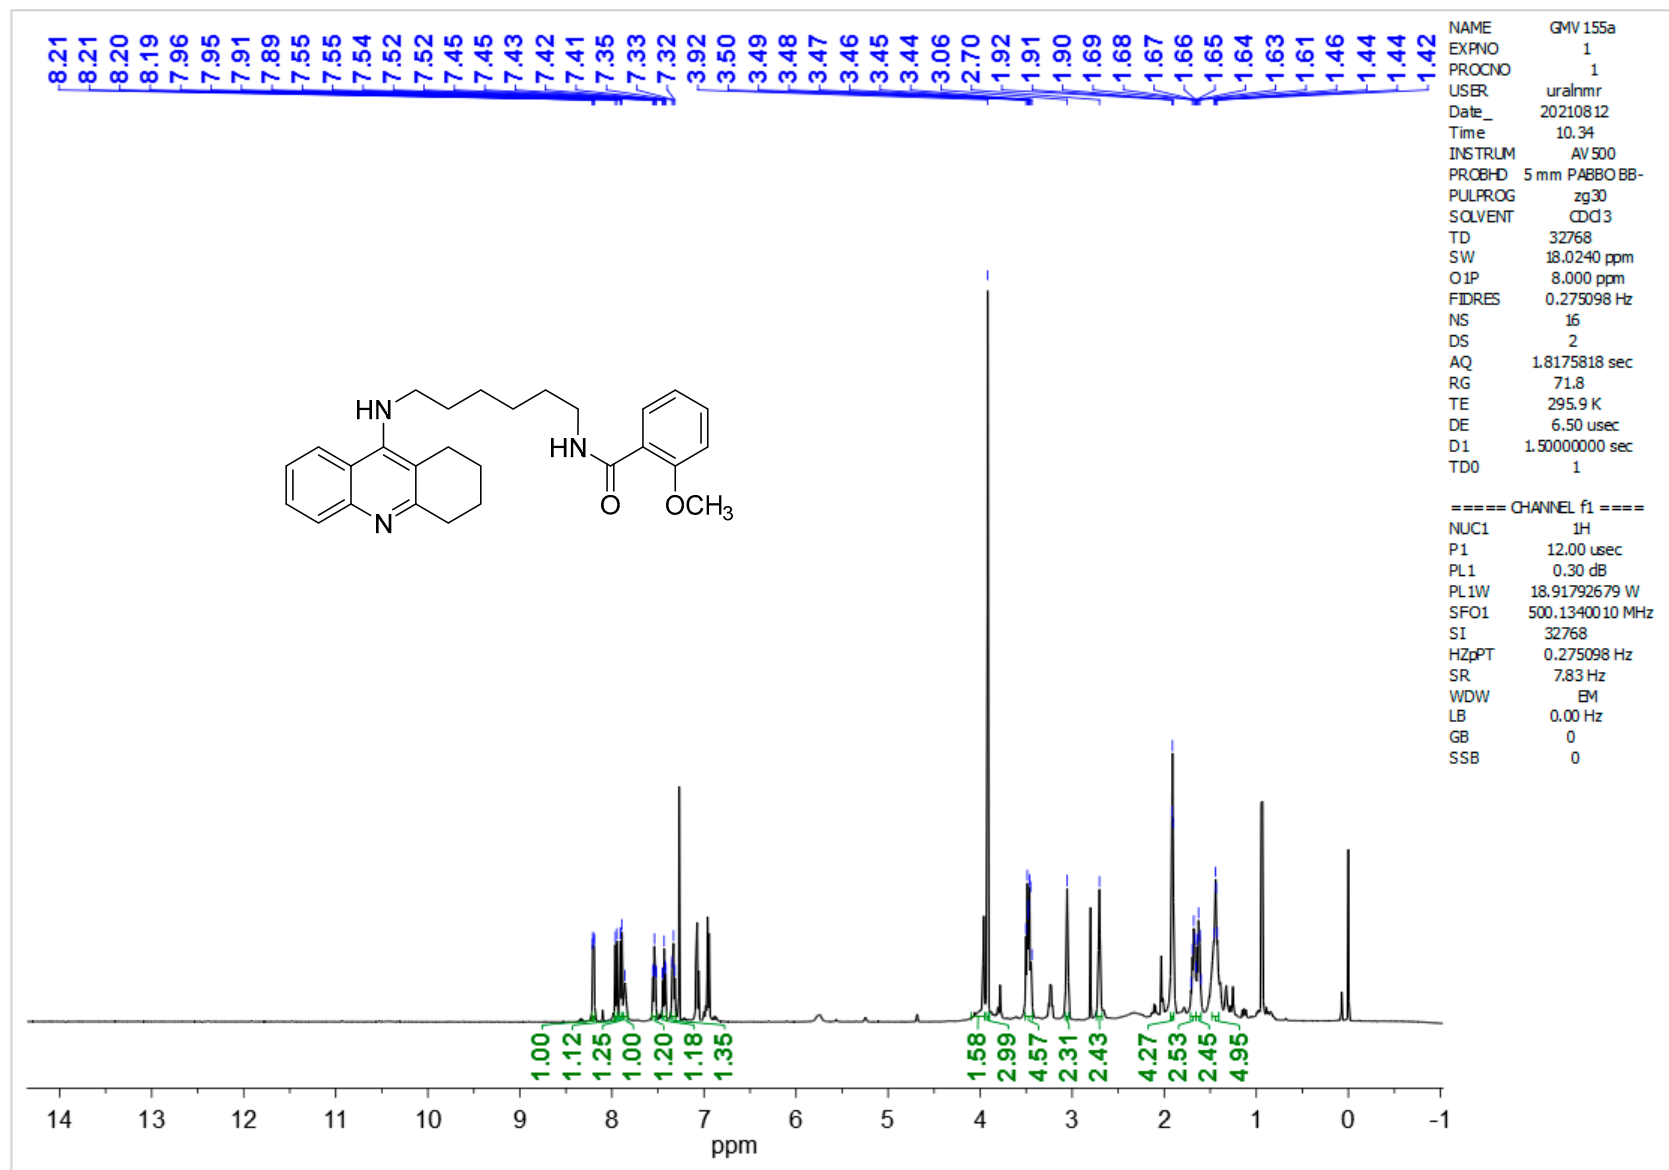

Figure S5. <sup>1</sup>H NMR spectrum of compound 6b

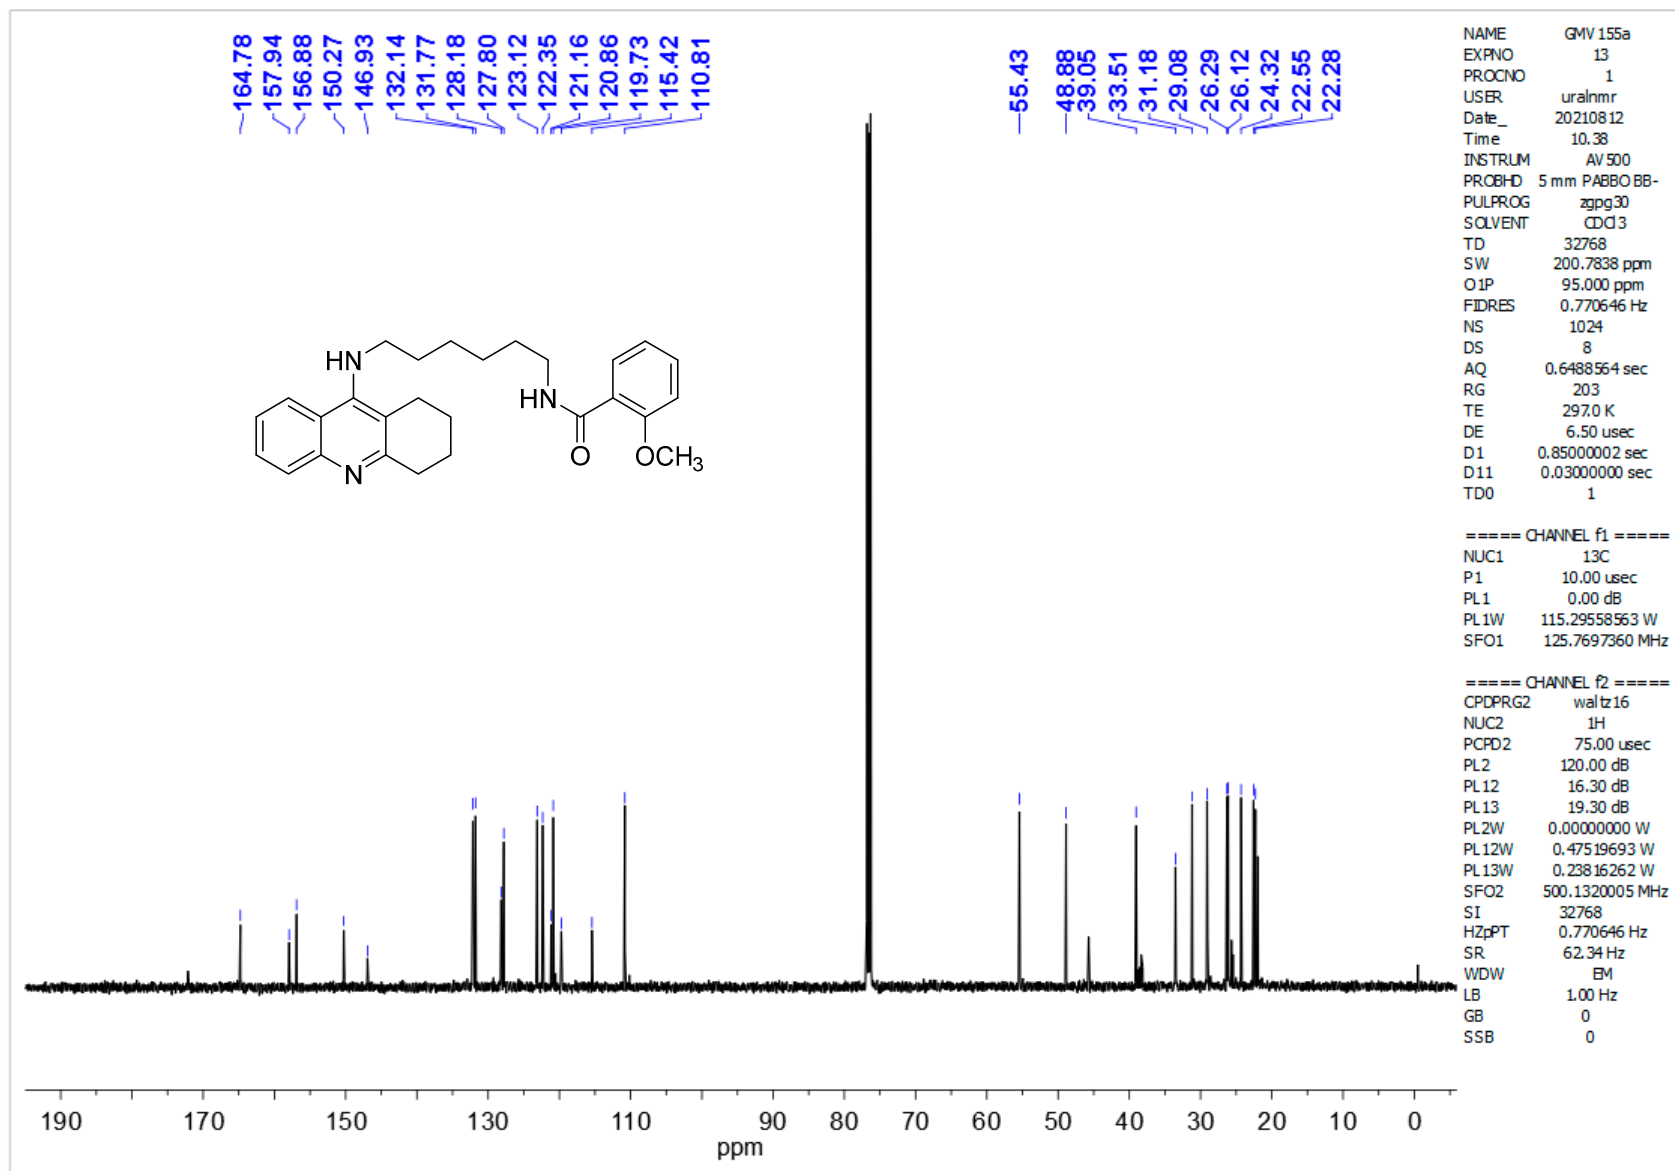

Figure S6. <sup>13</sup>C NMR spectrum of compound **6b**

# Compound Spectrum SmartFormula Report

## Analysis Info

Analysis Name D:\Data\ING21\GMV-155a.22i-C.EP180.6222\_23i1015.d  
 Method EP180UI21HPC50-1600\_500-3500-0.4-4-200\_1f2002f200hrf70ie5lm70ce10pps6crf300-1200tt40-110\_F3x1\_Segm1.m

Acquisition Date 9/23/2021 10:10:46 AM

## Sample Name

Comment

2/09/2022: +Bckgnd: 118.09, 322.05, 622.03, 922.01, 1221.99, 1521.97, 1821.95, 2121.93, 2421.91, 2721.89 (G1969-85000; +/-299.981 HPC); other intense peaks (>2\*e4): 102.13 (NEt3); 132.91 (\*2-PrOH); 391.28&413.26 (DOP); 86.10, 113.13, 140.07, 149.02, 158.96, 167.03, 187.07, 194.10, 203.14, 207.17, 209.19, 214.25, 217.10, 223.21, 227.23, 237.22, 245.19, 249.22, 251.24, 255.27, 259.20, 263.23, 265.25, 273.22, 279.16, 291.27, 293.28, 304.30, 307.30, 321.31, 326.38, 332.33, 335.33, 349.35, 413.27, 1259.95, 1307.08, 1559.93: background (prev. analyzed samples and impurities); 188.09 (#6216); 588.32 (#6218); 404.23 (#6219); 376.20 (#6220); 440.21 (#6221)

Instrument maXis impact

## Acquisition Parameter

|             |          |                      |          |                  |           |
|-------------|----------|----------------------|----------|------------------|-----------|
| Source Type | ESI      | Ion Polarity         | Positive | Set Nebulizer    | 0.4 Bar   |
| Focus       | Active   | Set Capillary        | 3500 V   | Set Dry Heater   | 200 °C    |
| Scan Begin  | 50 m/z   | Set End Plate Offset | -500 V   | Set Dry Gas      | 4.0 l/min |
| Scan End    | 1600 m/z | Set Charging Voltage | 2000 V   | Set Divert Valve | Source    |
|             |          | Set Corona           | 0 nA     | Set APCI Heater  | 0 °C      |

1819696.00172

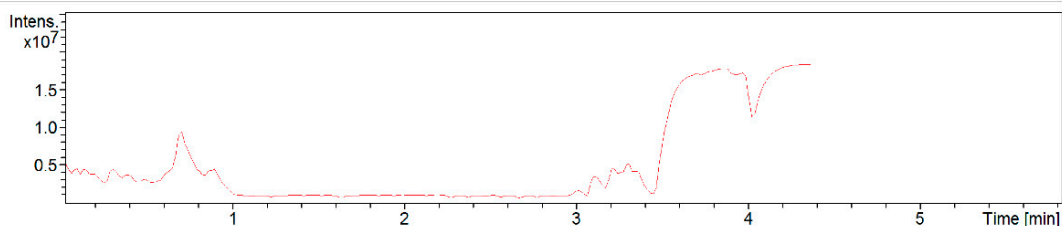

## +MS, 3.7-4.0min #210-227

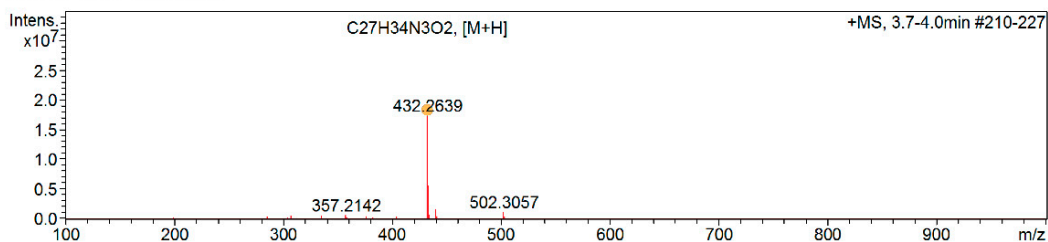

| Meas. m/z | # | Ion Formula | m/z      | err [ppm] | mSigma | # mSigma | Score  | rdb  | e <sup>-</sup> Conf | N-Rule |
|-----------|---|-------------|----------|-----------|--------|----------|--------|------|---------------------|--------|
| 432.2639  | 1 | C27H34N3O2  | 432.2646 | 1.5       | 10.9   | 1        | 100.00 | 12.5 | even                | ok     |
|           | 2 | C23H30N9    | 432.2619 | -4.7      | 22.7   | 2        | 33.17  | 13.5 | even                | ok     |

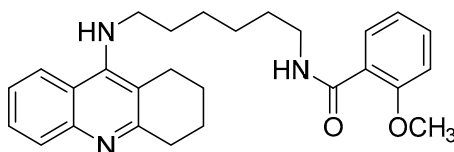

GMV-155a.22i-C.EP180.6222\_23i1015.d

Bruker Compass DataAnalysis 4.2

printed: 9/23/2021 10:18:25 AM

Page 1 of 1

**Figure S7.** HMRS spectrum of compound **6b**

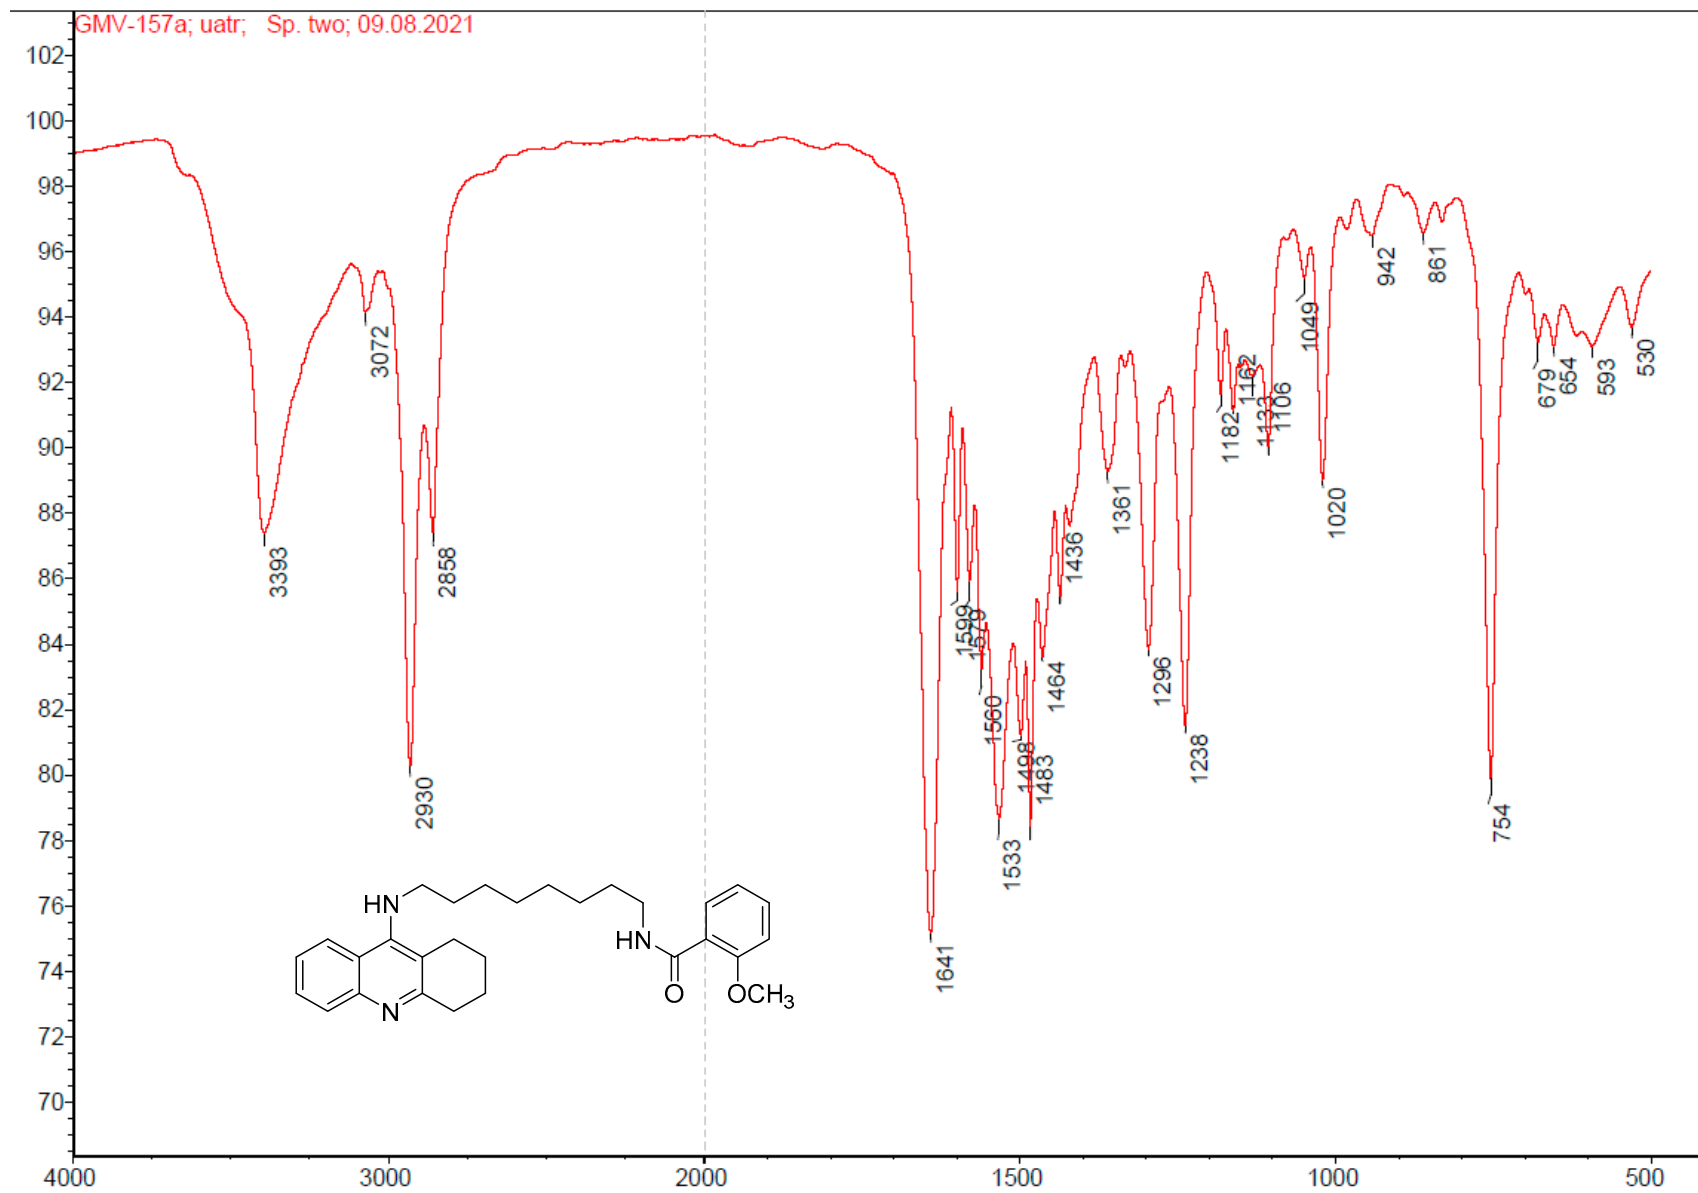

Figure S7. IR spectrum of compound 6c



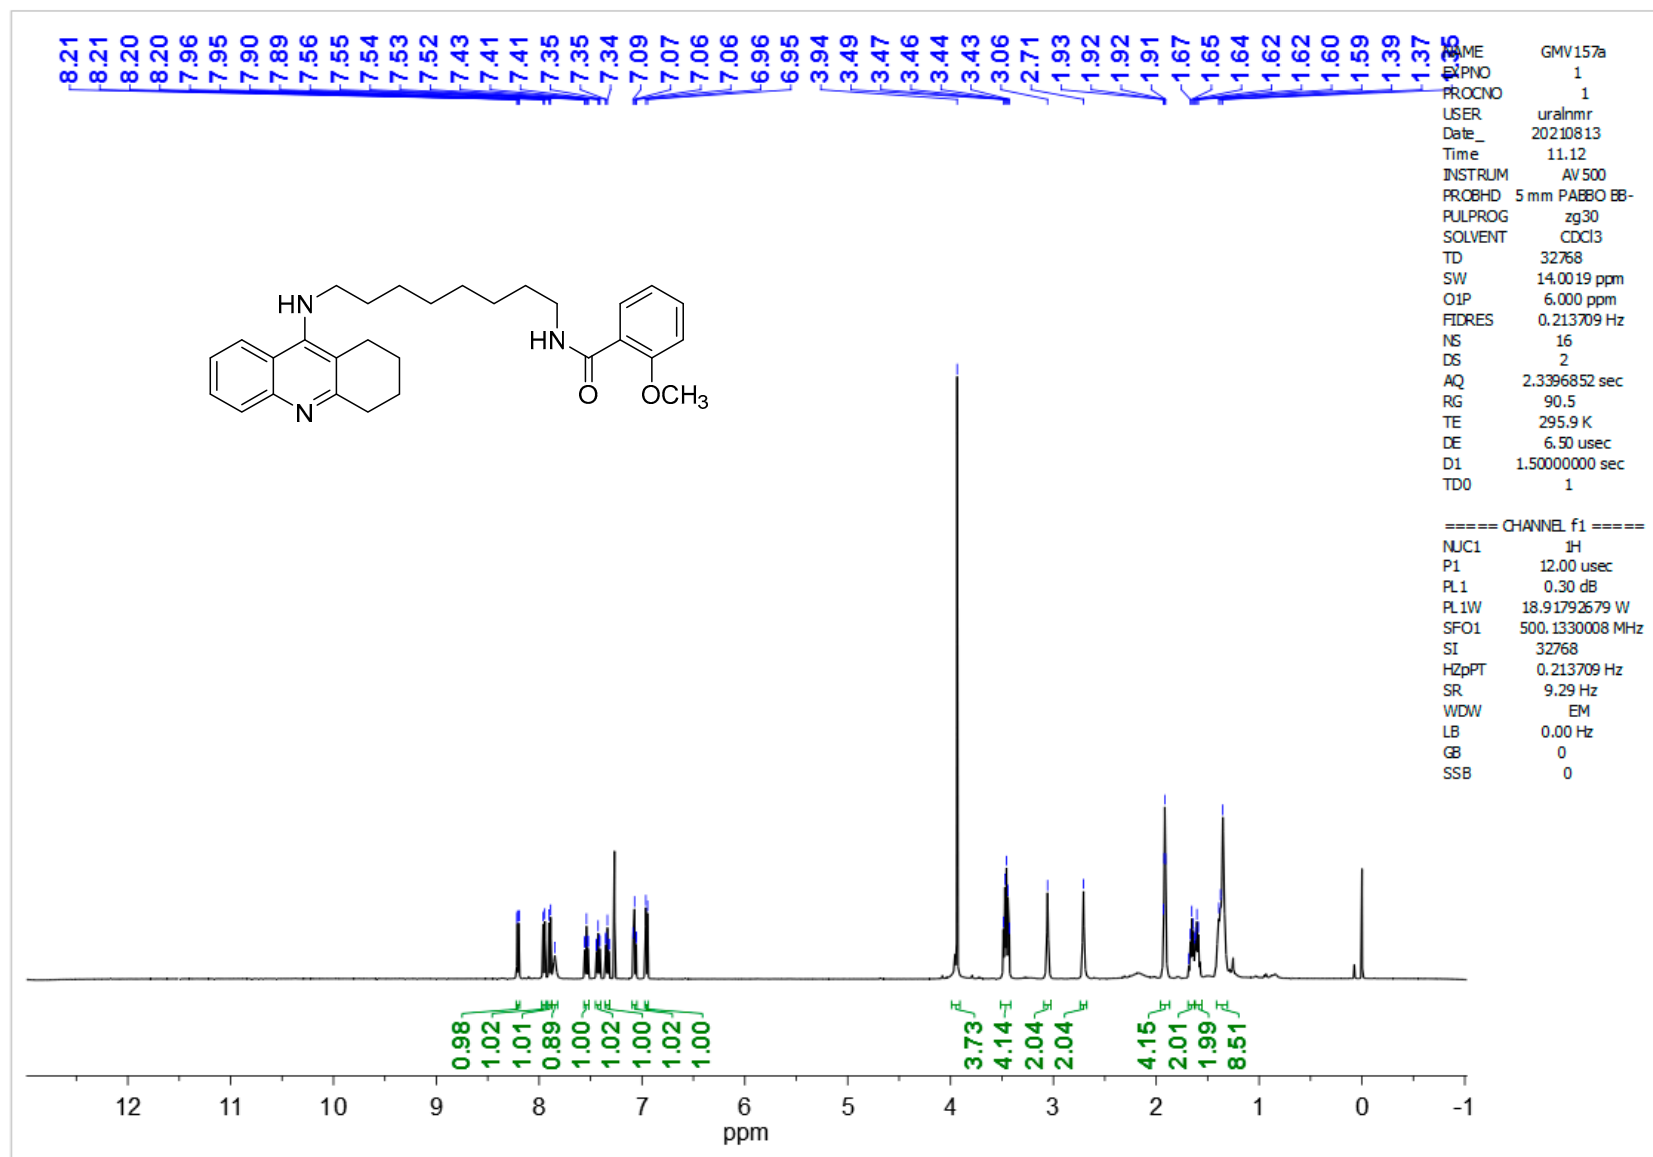

Figure S8. <sup>1</sup>H NMR spectrum of compound 6c

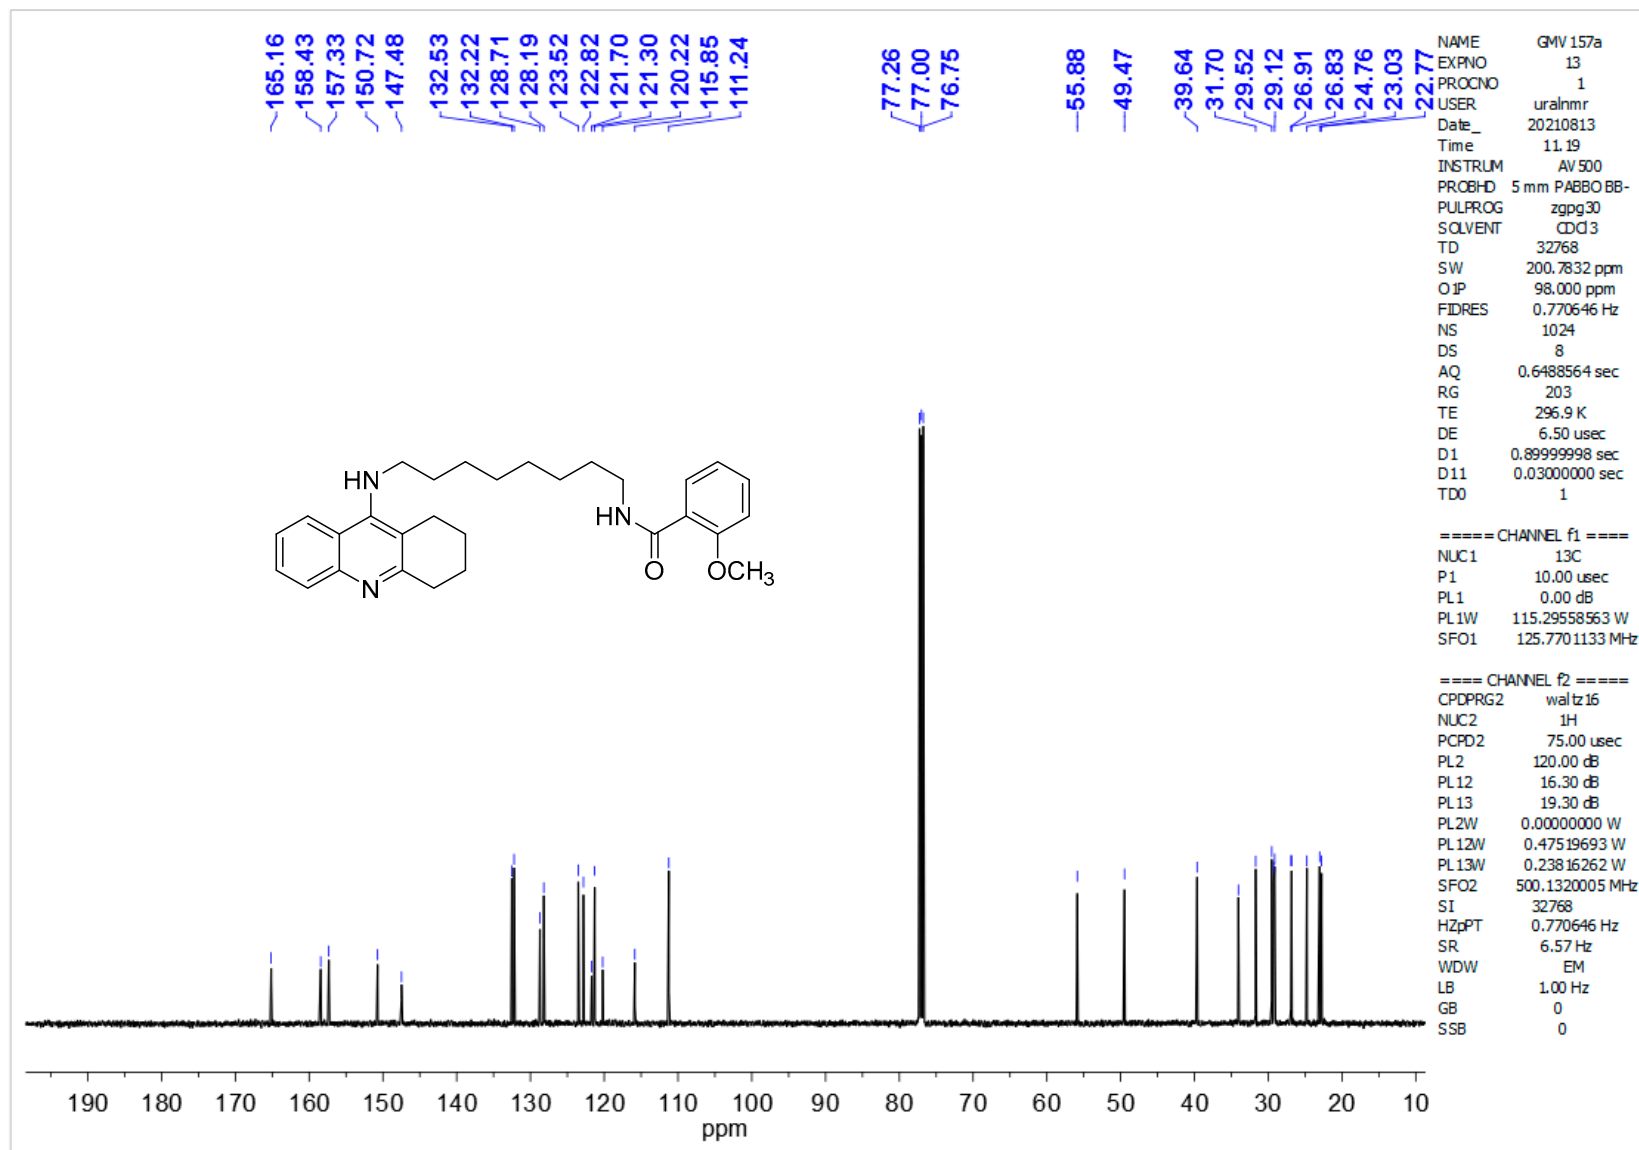

Figure S9. <sup>13</sup>C NMR spectrum of compound 6c

# Compound Spectrum SmartFormula Report

## Analysis Info

Analysis Name D:\Data\ING21\GMV-157a.22i-C.EP180.6224\_23i1100.d  
 Method EP180UI21HPC50-1600\_500-3500-0.4-4-200\_1f2002f200hrf70ie5lm70ce10pps6crf300-1200tt40-110\_F3x1\_Segm1.m  
 Sample Name  
 Comment 2/09/2022: +Bckgnd: 118.09, 322.05, 622.03, 922.01, 1221.99, 1521.97, 1821.95, 2121.93, 2421.91, 2721.89 (G1969-85000; +/-299.981 HPC); other intense peaks (>2\*e4): 102.13 (NEt3); 132.91 (\*2-PrOH); 391.28&413.26 (DOP); 86.10, 113.13, 140.07, 149.02, 158.96, 167.03, 187.07, 194.10, 203.14, 207.17, 209.19, 214.25, 217.10, 223.21, 227.23, 237.22, 245.19, 249.22, 251.24, 255.27, 259.20, 263.23, 265.25, 273.22, 279.16, 291.27, 293.28, 304.30, 307.30, 321.31, 326.38, 332.33, 335.33, 349.35, 413.27, 1259.95, 1307.08, 1559.93: background (prev. analyzed samples and impurities); 188.09 (#6216); 588.32 (#6218); 404.23 (#6219); 376.20 (#6220); 440.21 (#6221)

Acquisition Date 9/23/2021 11:25:07 AM

Instrument maXis impact

## Acquisition Parameter

|             |          |                      |          |                  |           |
|-------------|----------|----------------------|----------|------------------|-----------|
| Source Type | ESI      | Ion Polarity         | Positive | Set Nebulizer    | 0.4 Bar   |
| Focus       | Active   | Set Capillary        | 3500 V   | Set Dry Heater   | 200 °C    |
| Scan Begin  | 50 m/z   | Set End Plate Offset | -500 V   | Set Dry Gas      | 4.0 l/min |
| Scan End    | 1600 m/z | Set Charging Voltage | 2000 V   | Set Divert Valve | Source    |
|             |          | Set Corona           | 0 nA     | Set APCI Heater  | 0 °C      |

1819696.00172

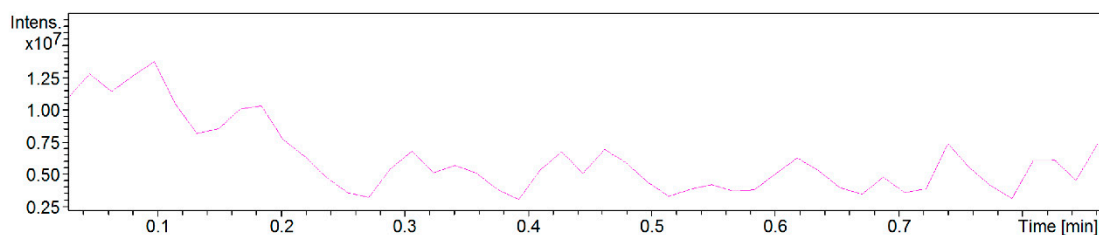

## +MS, 0.4-0.8min #20-47

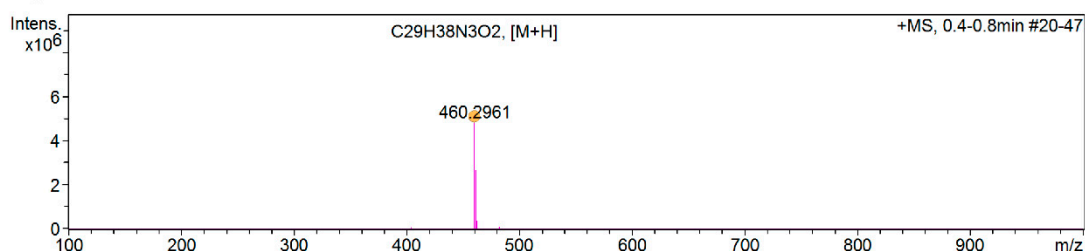

| Meas. m/z | # | Ion Formula | m/z      | err [ppm] | mSigma | # mSigma | Score  | rdB  | e <sup>-</sup> Conf | N-Rule |
|-----------|---|-------------|----------|-----------|--------|----------|--------|------|---------------------|--------|
| 460.2961  | 1 | C29H38N3O2  | 460.2959 | -0.5      | 130.0  | 1        | 100.00 | 12.5 | even                | ok     |
|           | 2 | C17H42N5O9  | 460.2977 | 3.5       | 199.6  | 2        | 0.33   | -0.5 | even                | ok     |
|           | 3 | C14H34N15O3 | 460.2964 | 0.6       | 200.1  | 3        | 0.67   | 5.5  | even                | ok     |
|           | 4 | C13H38N11O7 | 460.2950 | -2.4      | 213.1  | 4        | 0.14   | 0.5  | even                | ok     |

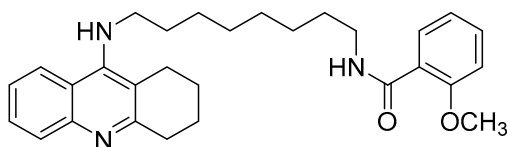

GMV-157a.22i-C.EP180.6224\_23i1100.d

Bruker Compass DataAnalysis 4.2

printed: 9/23/2021 11:27:05 AM

Page 1 of 1

Figure S10. HRMS spectrum of compound 6c

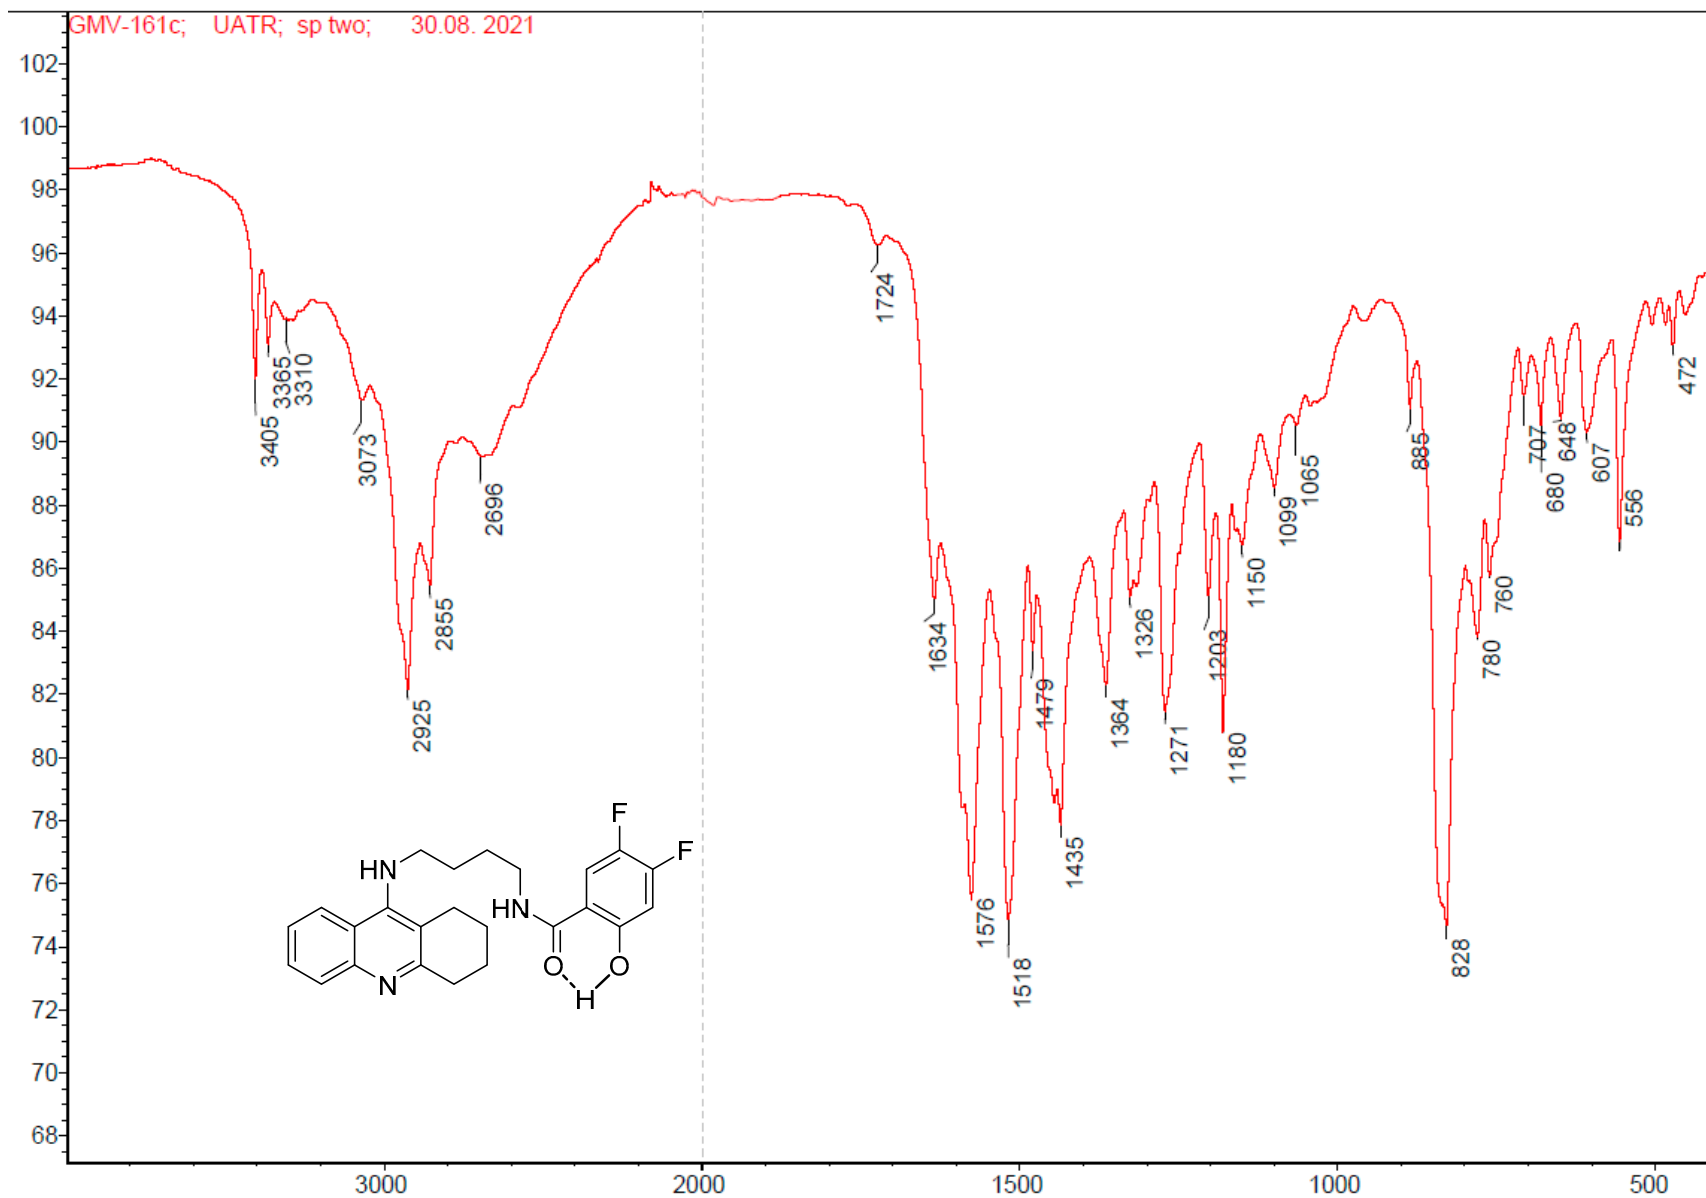

Figure S11. IR spectrum of compound 7a

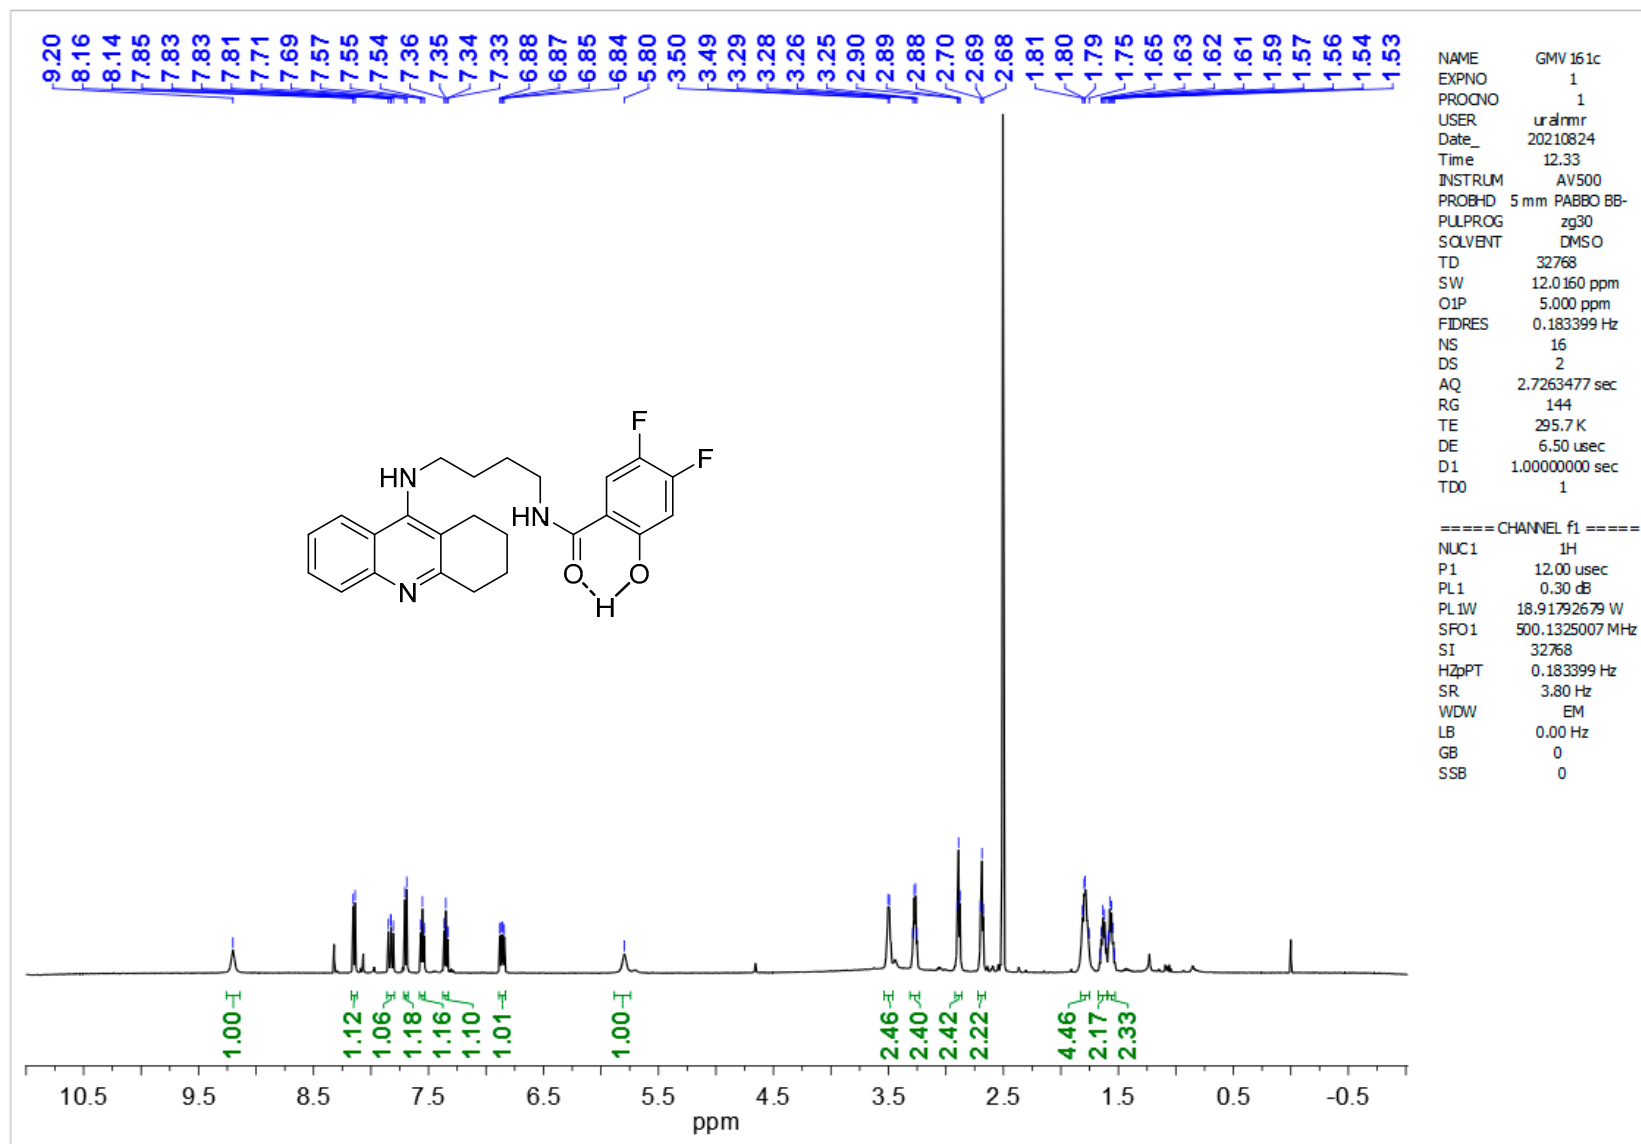

Figure S12. <sup>1</sup>H NMR spectrum of compound 7a

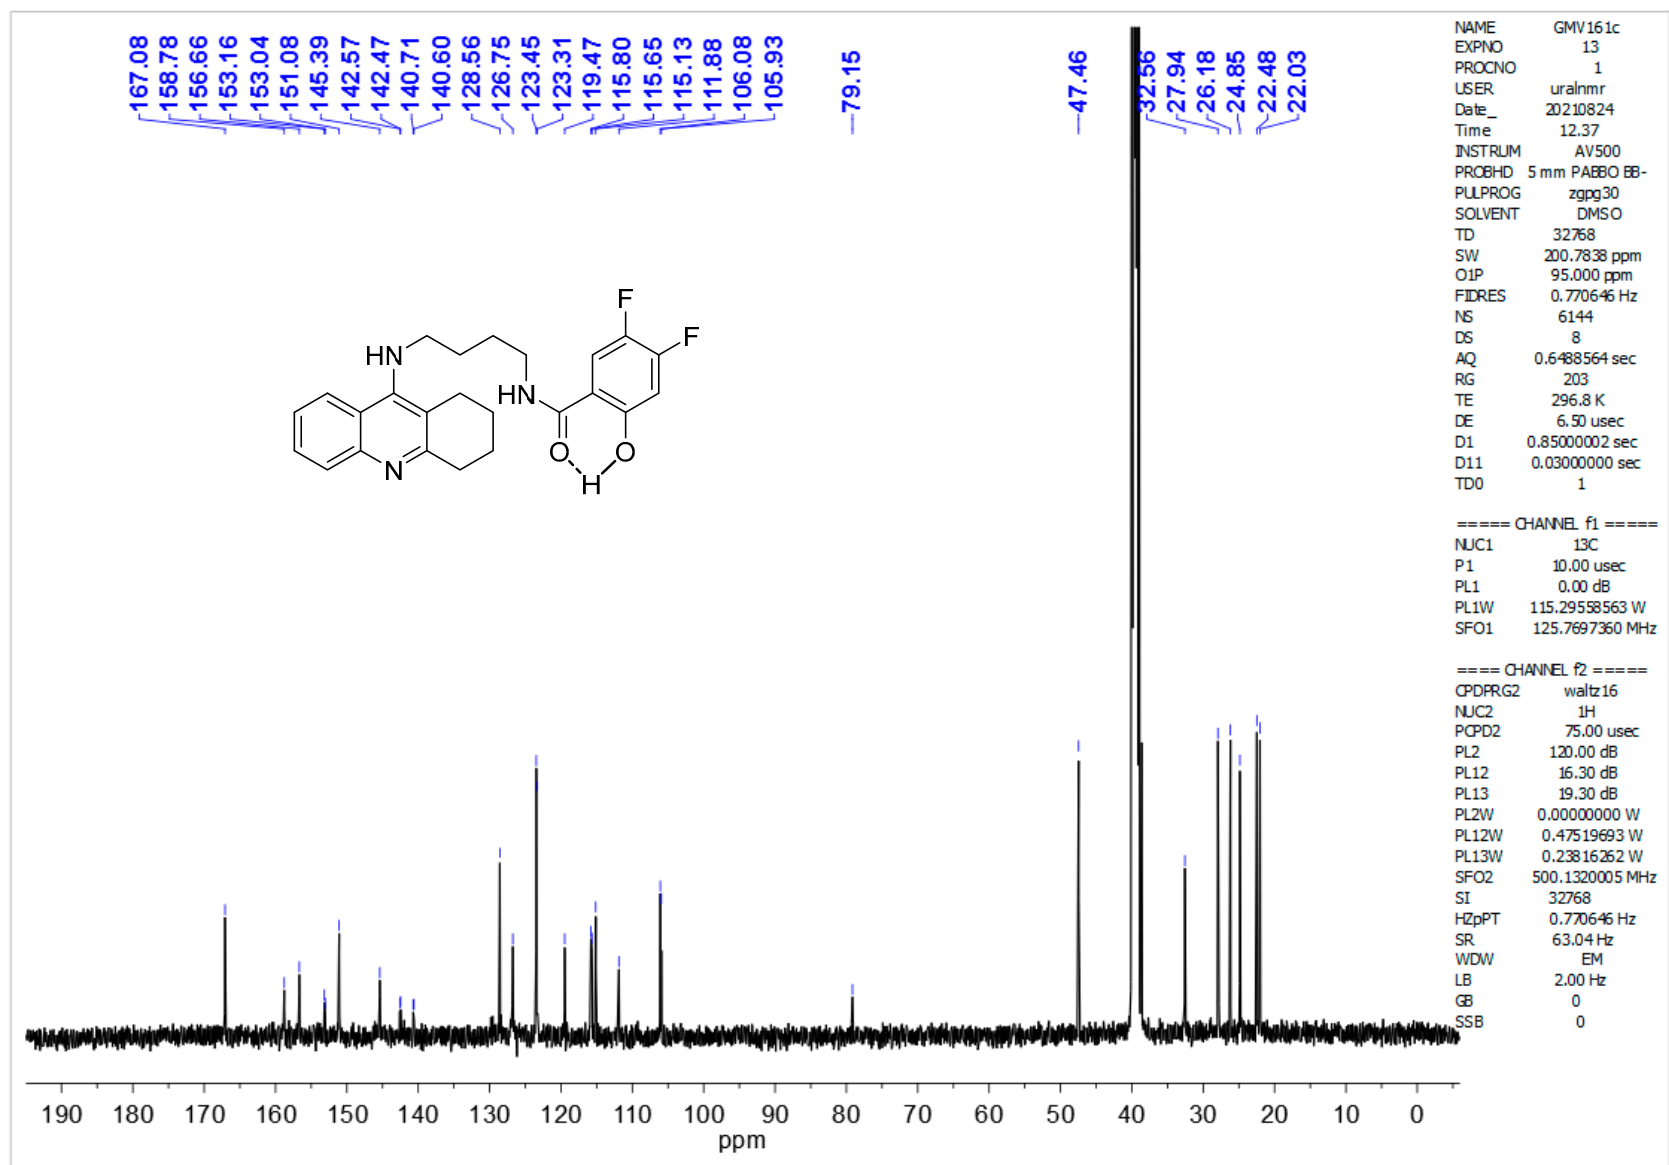

Figure S13. <sup>13</sup>C NMR spectrum of compound 7a

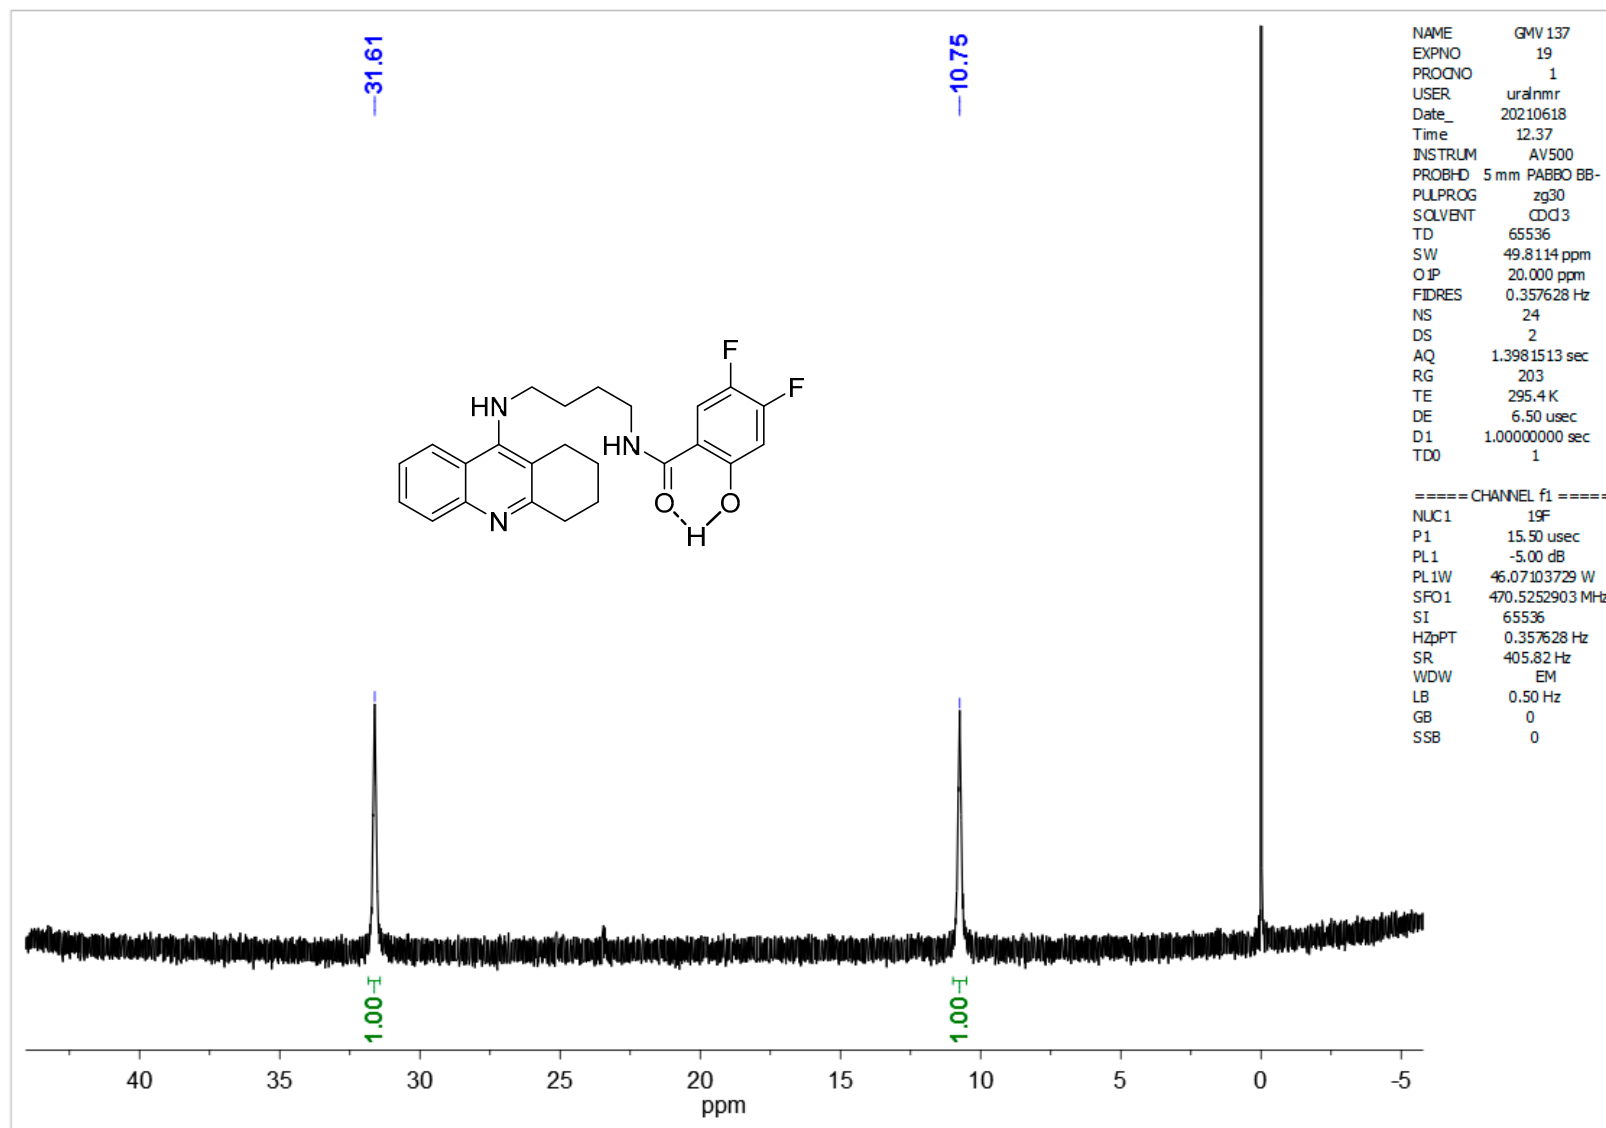

Figure S14. <sup>19</sup>F NMR spectrum of compound 7a

# Compound Spectrum SmartFormula Report

## Analysis Info

Analysis Name D:\Data\ING21\GMV-161c.23i-C.EP180.6240\_23i1300.d  
 Method EP180UI21HPC50-1600\_500-3500-0.4-4-200\_1f2002f200hrf Operator admin  
 70ie5lm70ce10pps6crf300-1200tt40-110\_F3x1\_Segm1.m  
 Sample Name Instrument maXis impact 1819696.00172  
 Comment 23/09/2022: +Bckgnd: 118.09, 322.05, 622.03, 922.01, 1221.99, 1521.97, 1821.95, 2121.93, 2421.91,  
 2721.89 (G1969-85000; +/-299.981 HPC); other intense peaks (>2\*e4): 102.13 (NEt3); 132.91 (\*2-PrOH);  
 391.28&413.26 (DOP); 86.10, 113.13, 140.07, 149.02, 158.96, 167.03, 187.07, 194.10, 203.14, 207.17,  
 209.19, 214.25, 217.10, 223.21, 227.23, 237.22, 245.19, 249.22, 251.24, 255.27, 259.20, 263.23, 265.25,  
 273.22, 279.16, 291.27, 293.28, 304.30, 307.30, 321.31, 326.38, 332.33, 335.33, 349.35, 413.27, 1259.95,  
 1307.08, 1559.93: background (prev. analyzed samples and impurities); 188.09 (#6216); 588.32 (#6218);  
 404.23 (#6219); 376.20 (#6220); 440.21 (#6221); 460.30 (#6224); 482.26 (#6239)

## Acquisition Parameter

|             |          |                      |          |                  |           |
|-------------|----------|----------------------|----------|------------------|-----------|
| Source Type | ESI      | Ion Polarity         | Positive | Set Nebulizer    | 0.4 Bar   |
| Focus       | Active   | Set Capillary        | 3500 V   | Set Dry Heater   | 200 °C    |
| Scan Begin  | 50 m/z   | Set End Plate Offset | -500 V   | Set Dry Gas      | 4.0 l/min |
| Scan End    | 1600 m/z | Set Charging Voltage | 2000 V   | Set Divert Valve | Source    |
|             |          | Set Corona           | 0 nA     | Set APCI Heater  | 0 °C      |

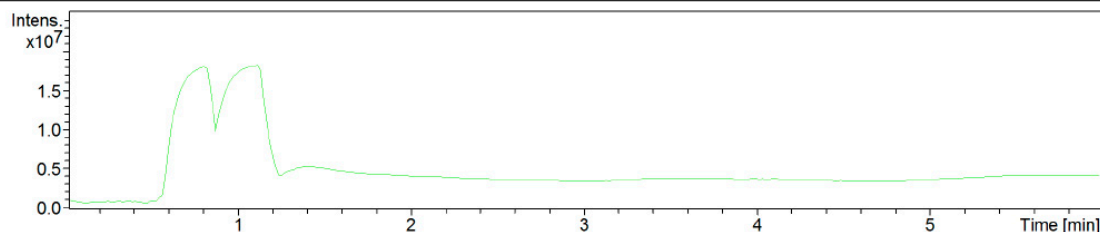

## +MS, 0.7-0.9min #42-49

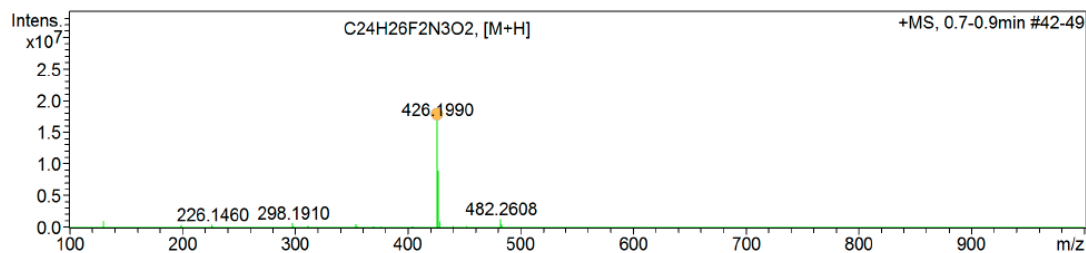

| Meas. m/z | # | Ion Formula  | m/z      | err [ppm] | mSigma | # mSigma | Score  | rdb  | e <sup>-</sup> Conf | N-Rule |
|-----------|---|--------------|----------|-----------|--------|----------|--------|------|---------------------|--------|
| 426.1990  | 1 | C24H26F2N3O2 | 426.1988 | -0.7      | 150.0  | 1        | 100.00 | 12.5 | even                | ok     |
|           | 2 | C21H27F3N3O3 | 426.1999 | 2.0       | 168.7  | 2        | 20.59  | 8.5  | even                | ok     |
|           | 3 | C19H24N9O3   | 426.1997 | 1.5       | 168.7  | 3        | 23.31  | 12.5 | even                | ok     |
|           | 4 | C18H28N5O7   | 426.1983 | -1.7      | 182.0  | 4        | 8.16   | 7.5  | even                | ok     |
|           | 5 | C15H29FN5O8  | 426.1995 | 1.0       | 200.6  | 5        | 2.08   | 3.5  | even                | ok     |
|           | 6 | C9H22F2N15O3 | 426.1993 | 0.5       | 219.3  | 6        | 0.44   | 5.5  | even                | ok     |

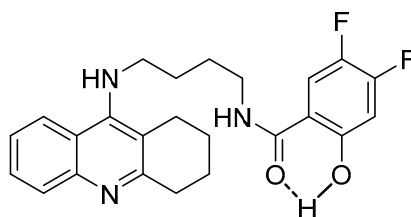

GMV-161c.23i-C.EP180.6240\_23i1300.d

Bruker Compass DataAnalysis 4.2

printed: 9/23/2021 1:08:14 PM

by: admin

Page 1 of 1

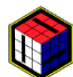

Institute of Organic Synthesis UB RAS  
 22 S.Kovalevskoy, 20 Akademicheskaya str, Yekaterinburg, Russian Federation  
 Phone: +7 (343) 362-34-56

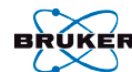

Figure S15. HMRS spectrum of compound 7a



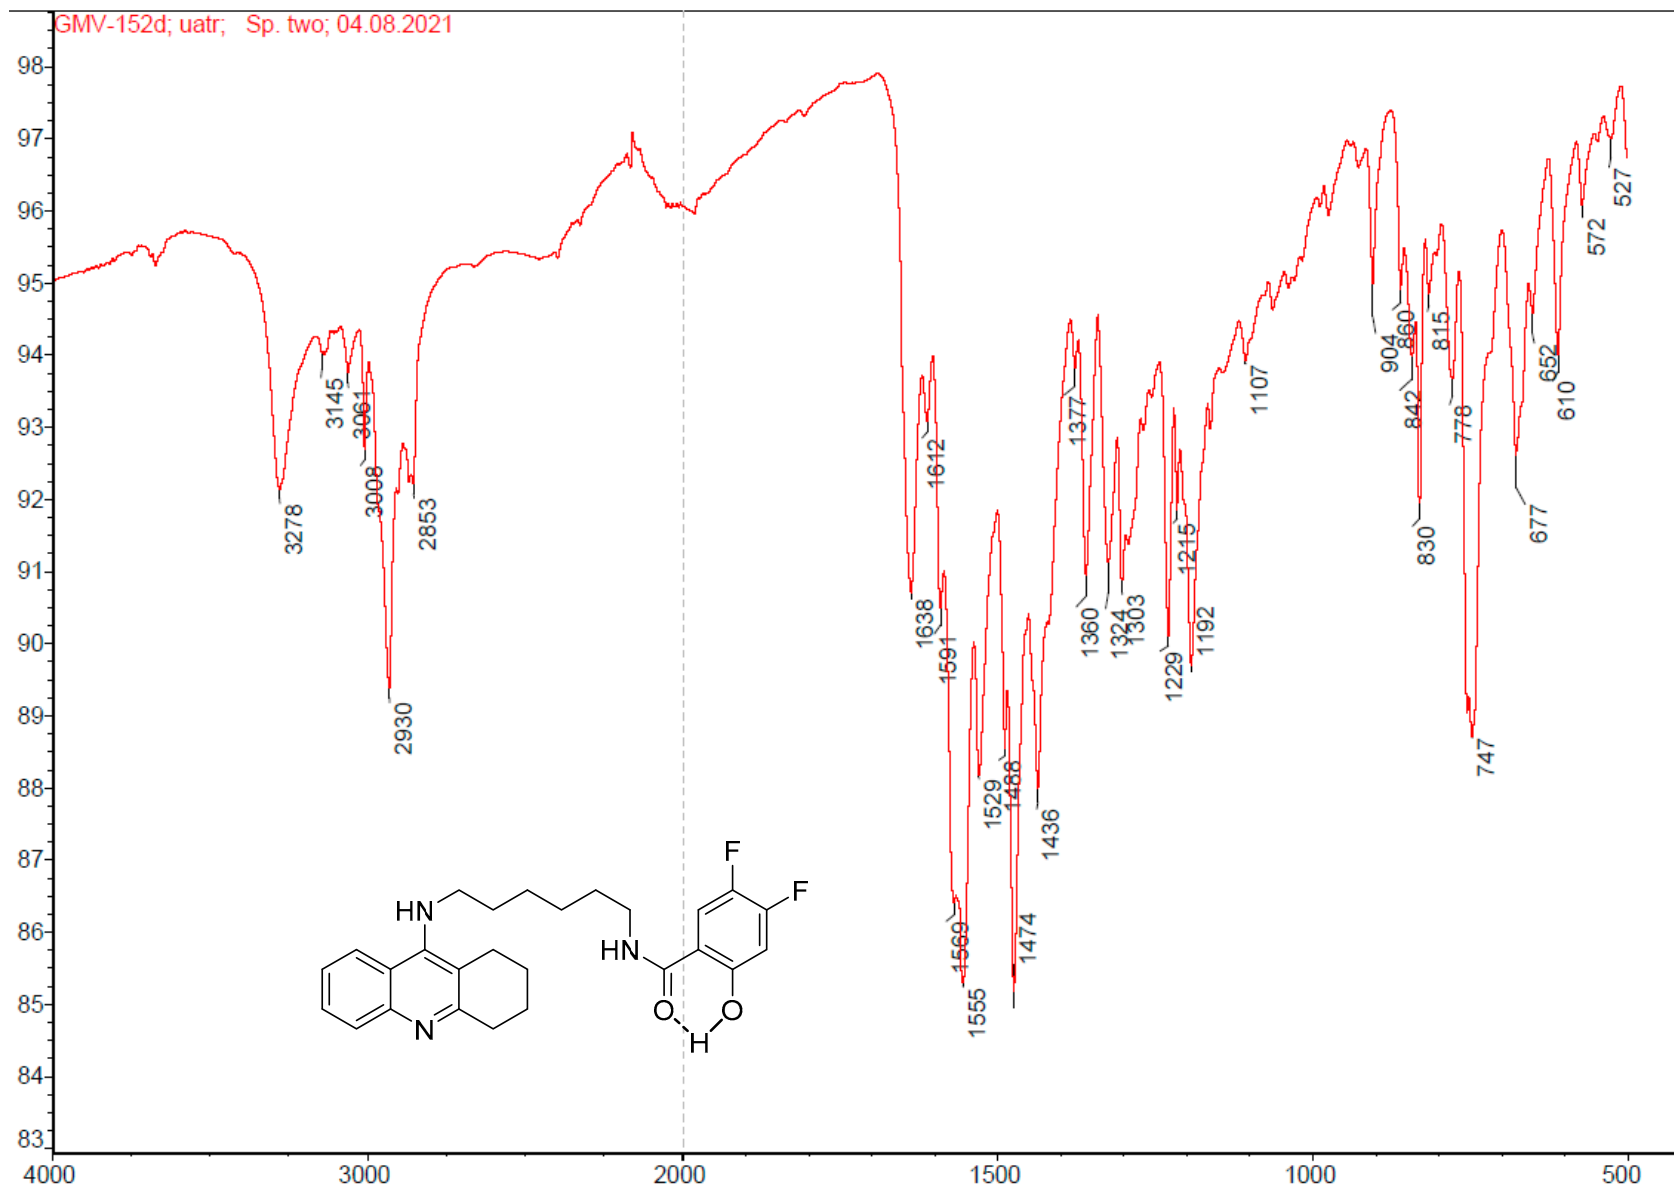

Figure S16. IR spectrum of compound **7b**

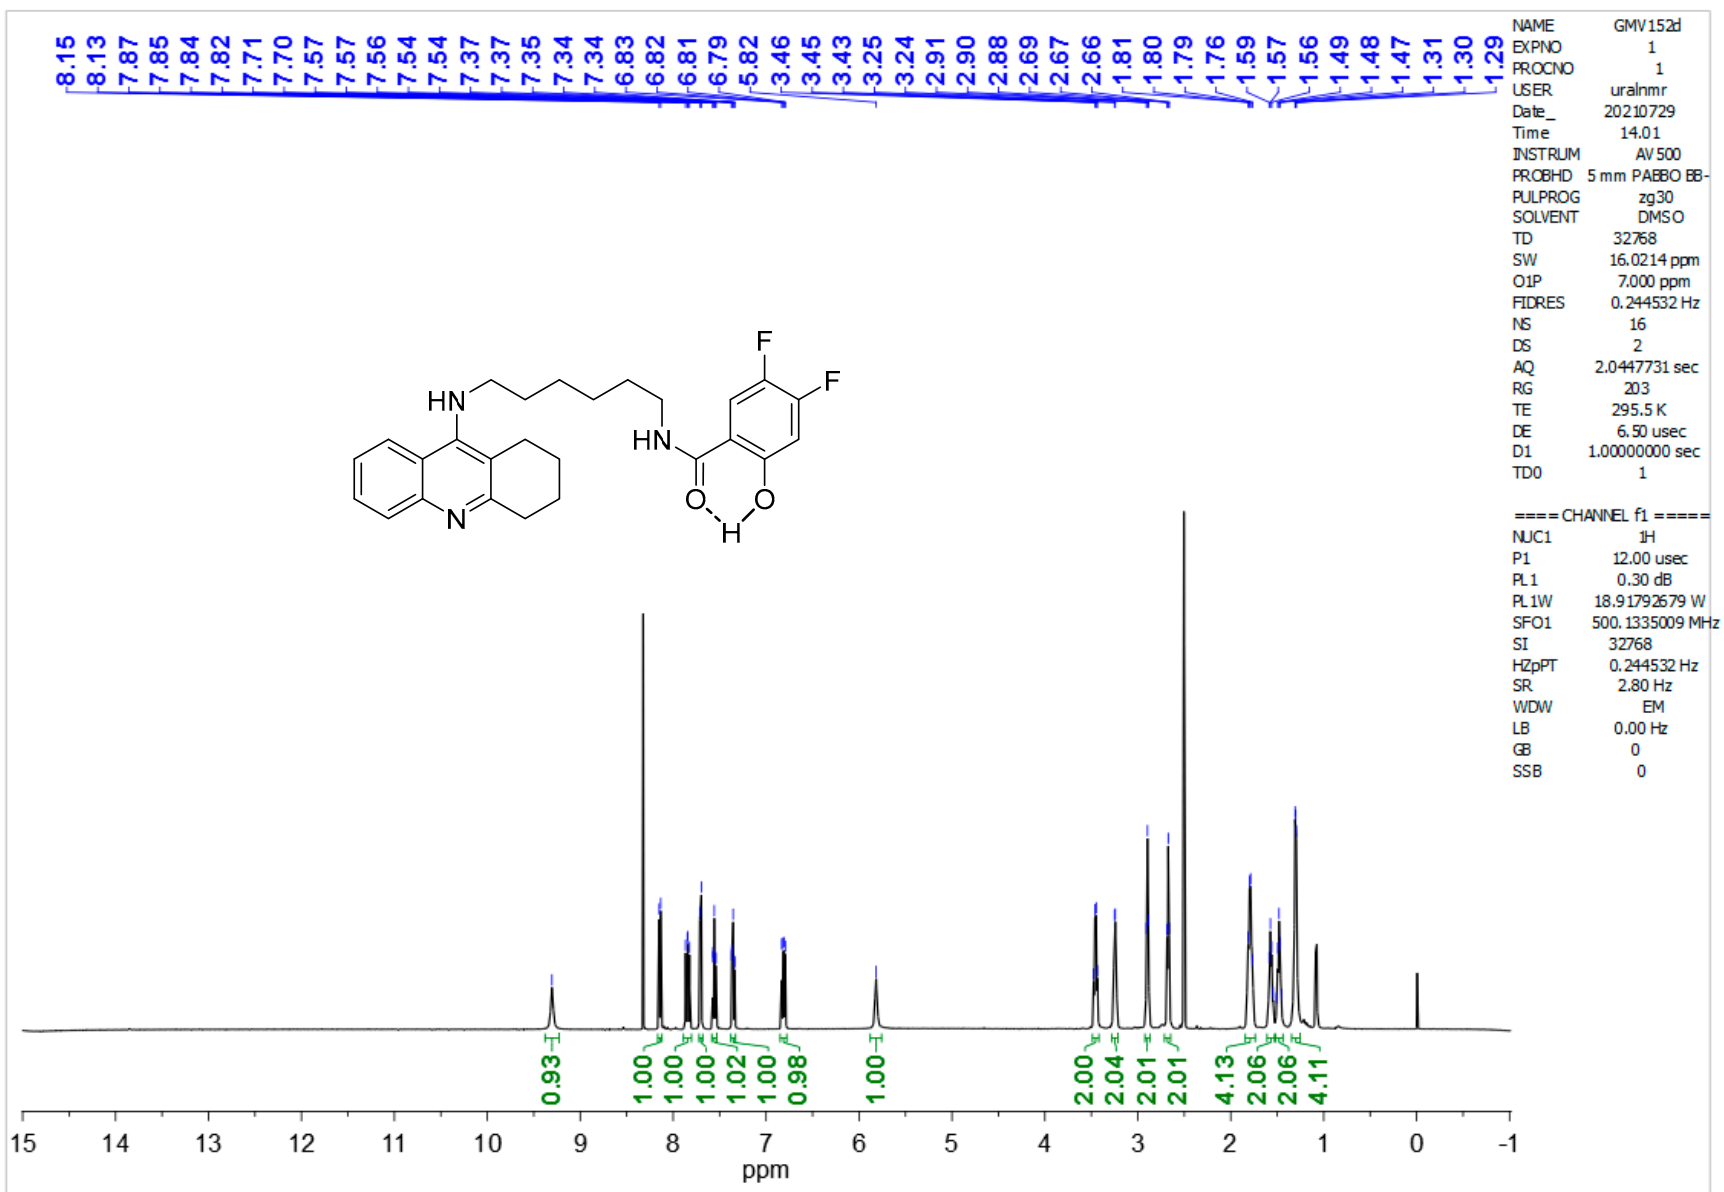

Figure S17. <sup>1</sup>H NMR spectrum of compound **7b**

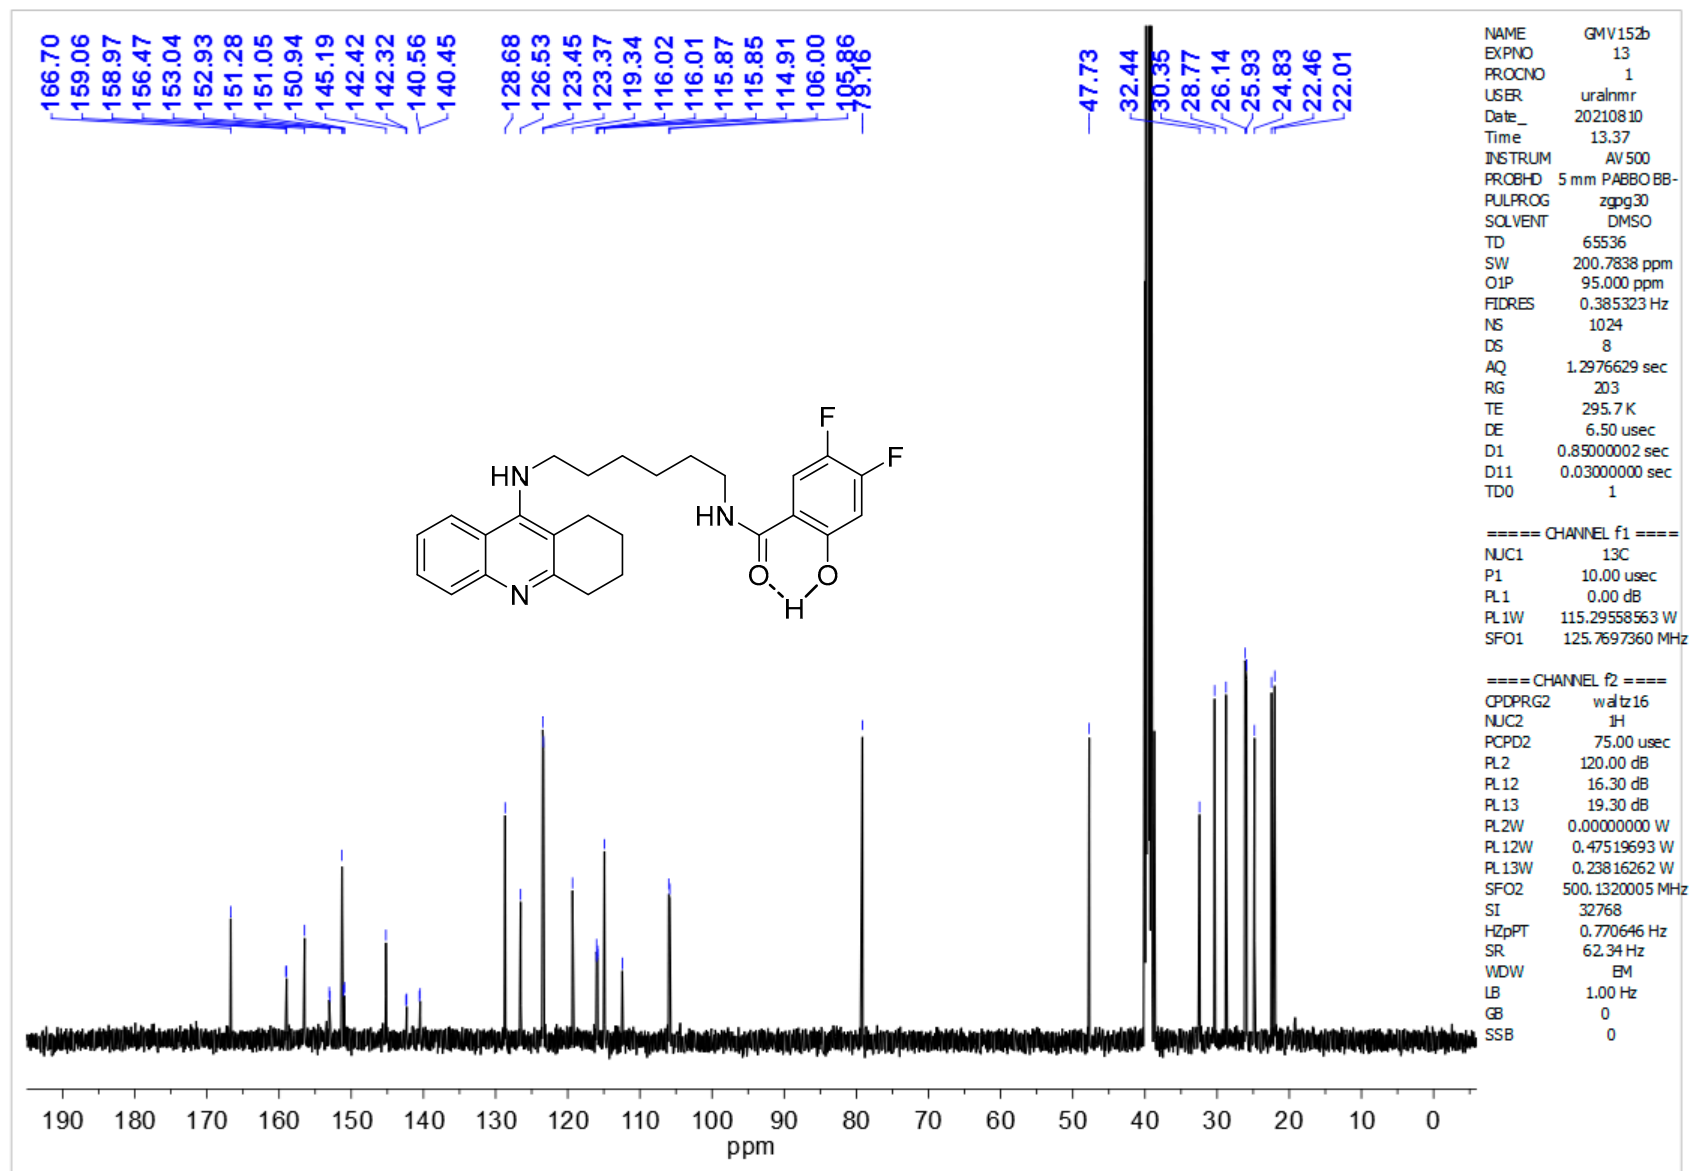

**Figure S18.** <sup>13</sup>C NMR spectrum of compound **7b**

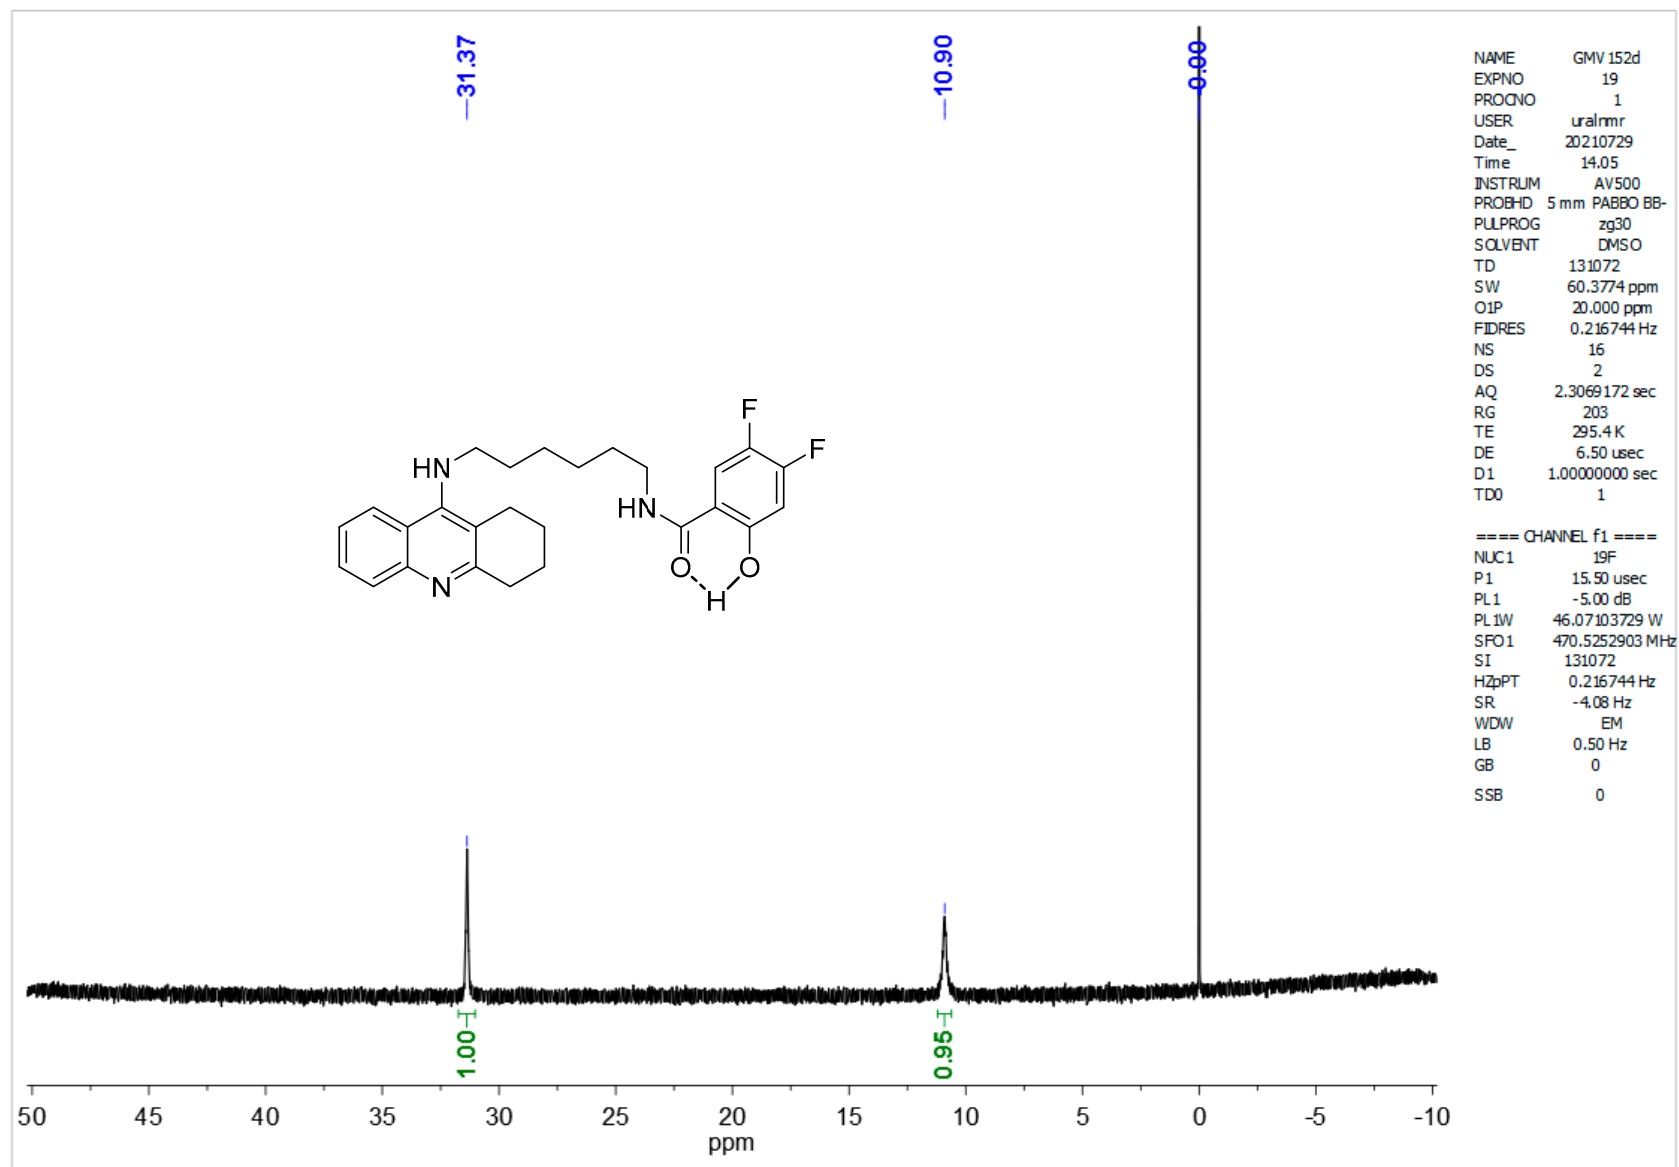

Figure S19. <sup>19</sup>F NMR spectrum of compound **7b**

# Compound Spectrum SmartFormula Report

## Analysis Info

Analysis Name D:\Data\ING21\GMV-152d.22i-C.EP180.6225\_23i1150.d  
 Method EP180UI21HPC50-1600\_500-3500-0.4-4-200\_1f2002f200hrf Operator admin  
 Sample Name 70ie5lm70ce10pps6crf300-1200tt40-110\_F3x1\_Segm1.m Instrument maXis impact 1819696.00172  
 Comment 2/09/2022: +Bckgnd: 118.09, 322.05, 622.03, 922.01, 1221.99, 1521.97, 1821.95, 2121.93, 2421.91, 2721.89 (G1969-85000; +/-299.981 HPC); other intense peaks (>2\*e4): 102.13 (NEt3); 132.91 (\*2-PrOH); 391.28&413.26 (DOP); 86.10, 113.13, 140.07, 149.02, 158.96, 167.03, 187.07. 194.10, 203.14, 207.17, 209.19, 214.25, 217.10, 223.21, 227.23, 237.22, 245.19, 249.22, 251.24, 255.27, 259.20, 263.23, 265.25, 273.22, 279.16, 291.27, 293.28, 304.30, 307.30, 321.31, 326.38, 332.33, 335.33, 349.35, 413.27, 1259.95, 1307.08, 1559.93: background (prev. analyzed samples and impurities); 188.09 (#6216); 588.32 (#6218); 404.23 (#6219); 376.20 (#6220); 440.21 (#6221); 460.30 (#6224)

## Acquisition Parameter

|             |          |                      |          |                  |           |
|-------------|----------|----------------------|----------|------------------|-----------|
| Source Type | ESI      | Ion Polarity         | Positive | Set Nebulizer    | 0.4 Bar   |
| Focus       | Active   | Set Capillary        | 3500 V   | Set Dry Heater   | 200 °C    |
| Scan Begin  | 50 m/z   | Set End Plate Offset | -500 V   | Set Dry Gas      | 4.0 l/min |
| Scan End    | 1600 m/z | Set Charging Voltage | 2000 V   | Set Divert Valve | Source    |
|             |          | Set Corona           | 0 nA     | Set APCI Heater  | 0 °C      |

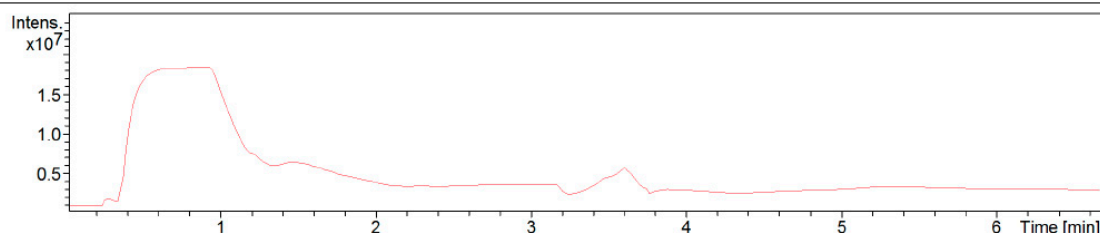

## +MS, 0.5-0.6min #28-33

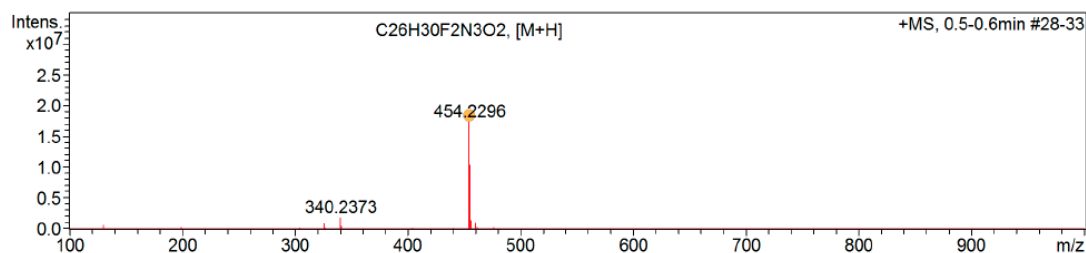

| Meas. m/z | # | Ion Formula   | m/z      | err [ppm] | mSigma | # mSigma | Score  | rdb  | e <sup>-</sup> Conf | N-Rule |
|-----------|---|---------------|----------|-----------|--------|----------|--------|------|---------------------|--------|
| 454.2296  | 1 | C29H29FN3O    | 454.2289 | -1.5      | 158.3  | 1        | 100.00 | 16.5 | even                | ok     |
|           | 2 | C26H30F2N3O2  | 454.2301 | 1.0       | 177.1  | 2        | 28.33  | 12.5 | even                | ok     |
|           | 3 | C20H32N5O7    | 454.2296 | 0.1       | 209.2  | 3        | 2.48   | 7.5  | even                | ok     |
|           | 4 | C14H25FN15O2  | 454.2294 | -0.4      | 228.1  | 4        | 0.41   | 9.5  | even                | ok     |
|           | 5 | C10H30F2N11O7 | 454.2292 | -0.8      | 259.8  | 5        | 0.02   | 0.5  | even                | ok     |

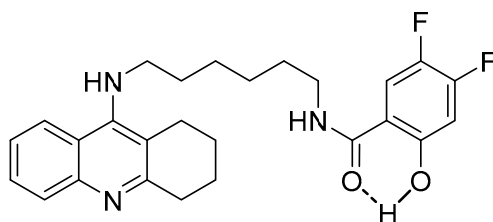

GMV-152d.22i-C.EP180.6225\_23i1150.d

Bruker Compass DataAnalysis 4.2

printed: 9/23/2021 11:58:05 AM

by: admin

Page 1 of 1

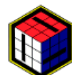

Institute of Organic Synthesis UB RAS  
 22 S.Kovalevskoy, 20 Akademicheskaya str, Yekaterinburg, Russian Federation  
 Phone: +7 (343) 362-34-56

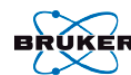

Figure S20. HRMS spectrum of compound 7b

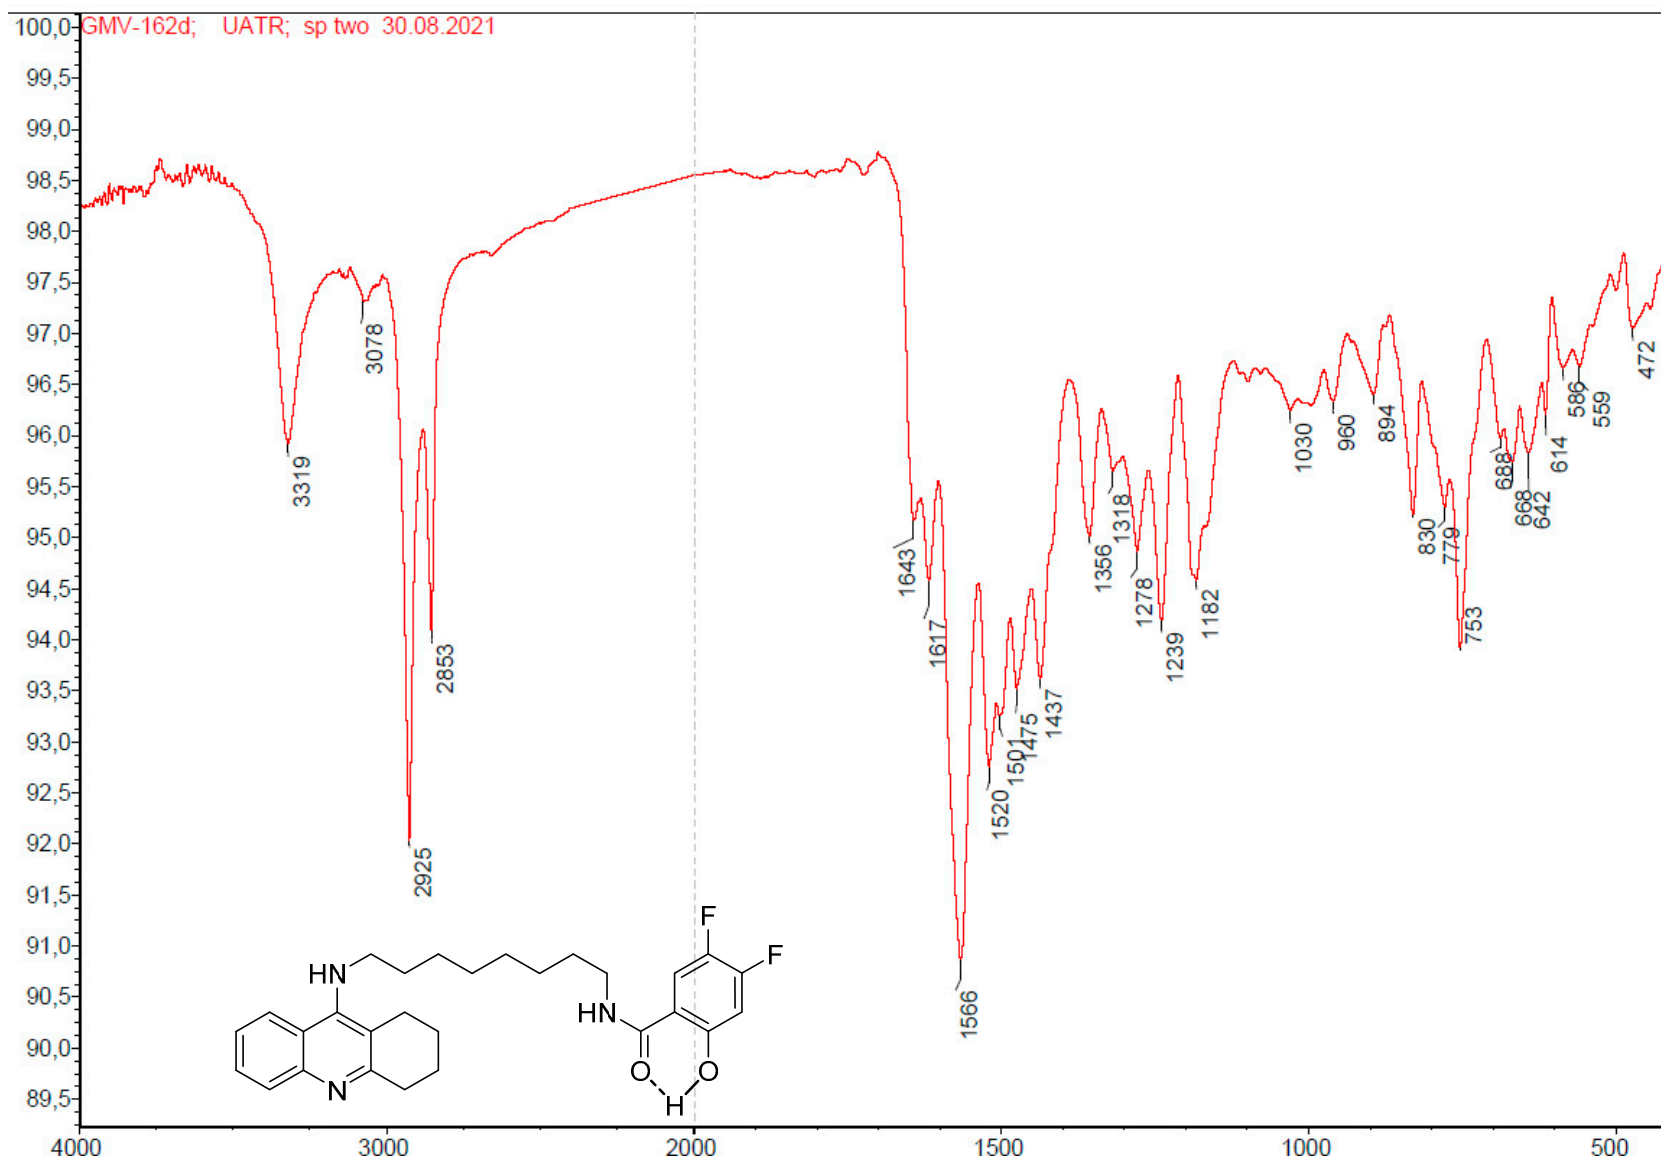

Figure S21. IR spectrum of compound 7c

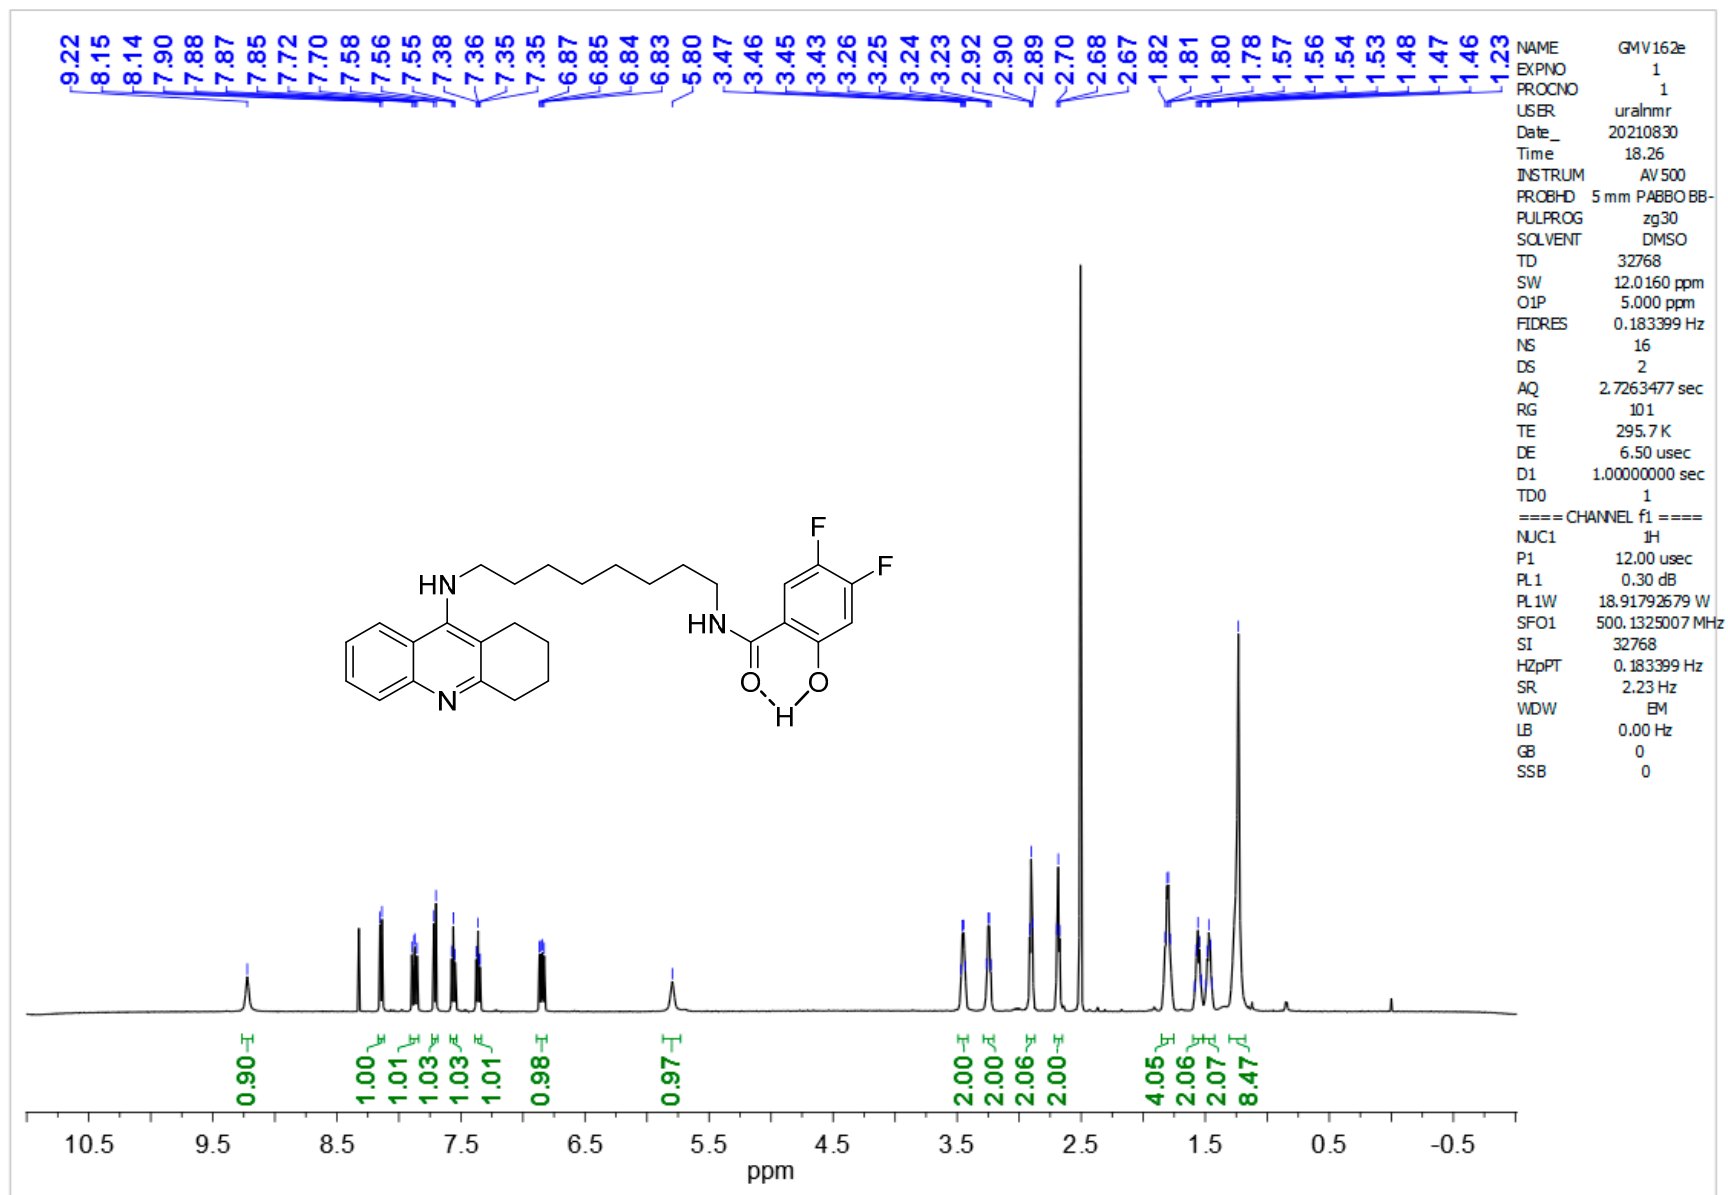

Figure S22. <sup>1</sup>H NMR spectrum of compound 7c

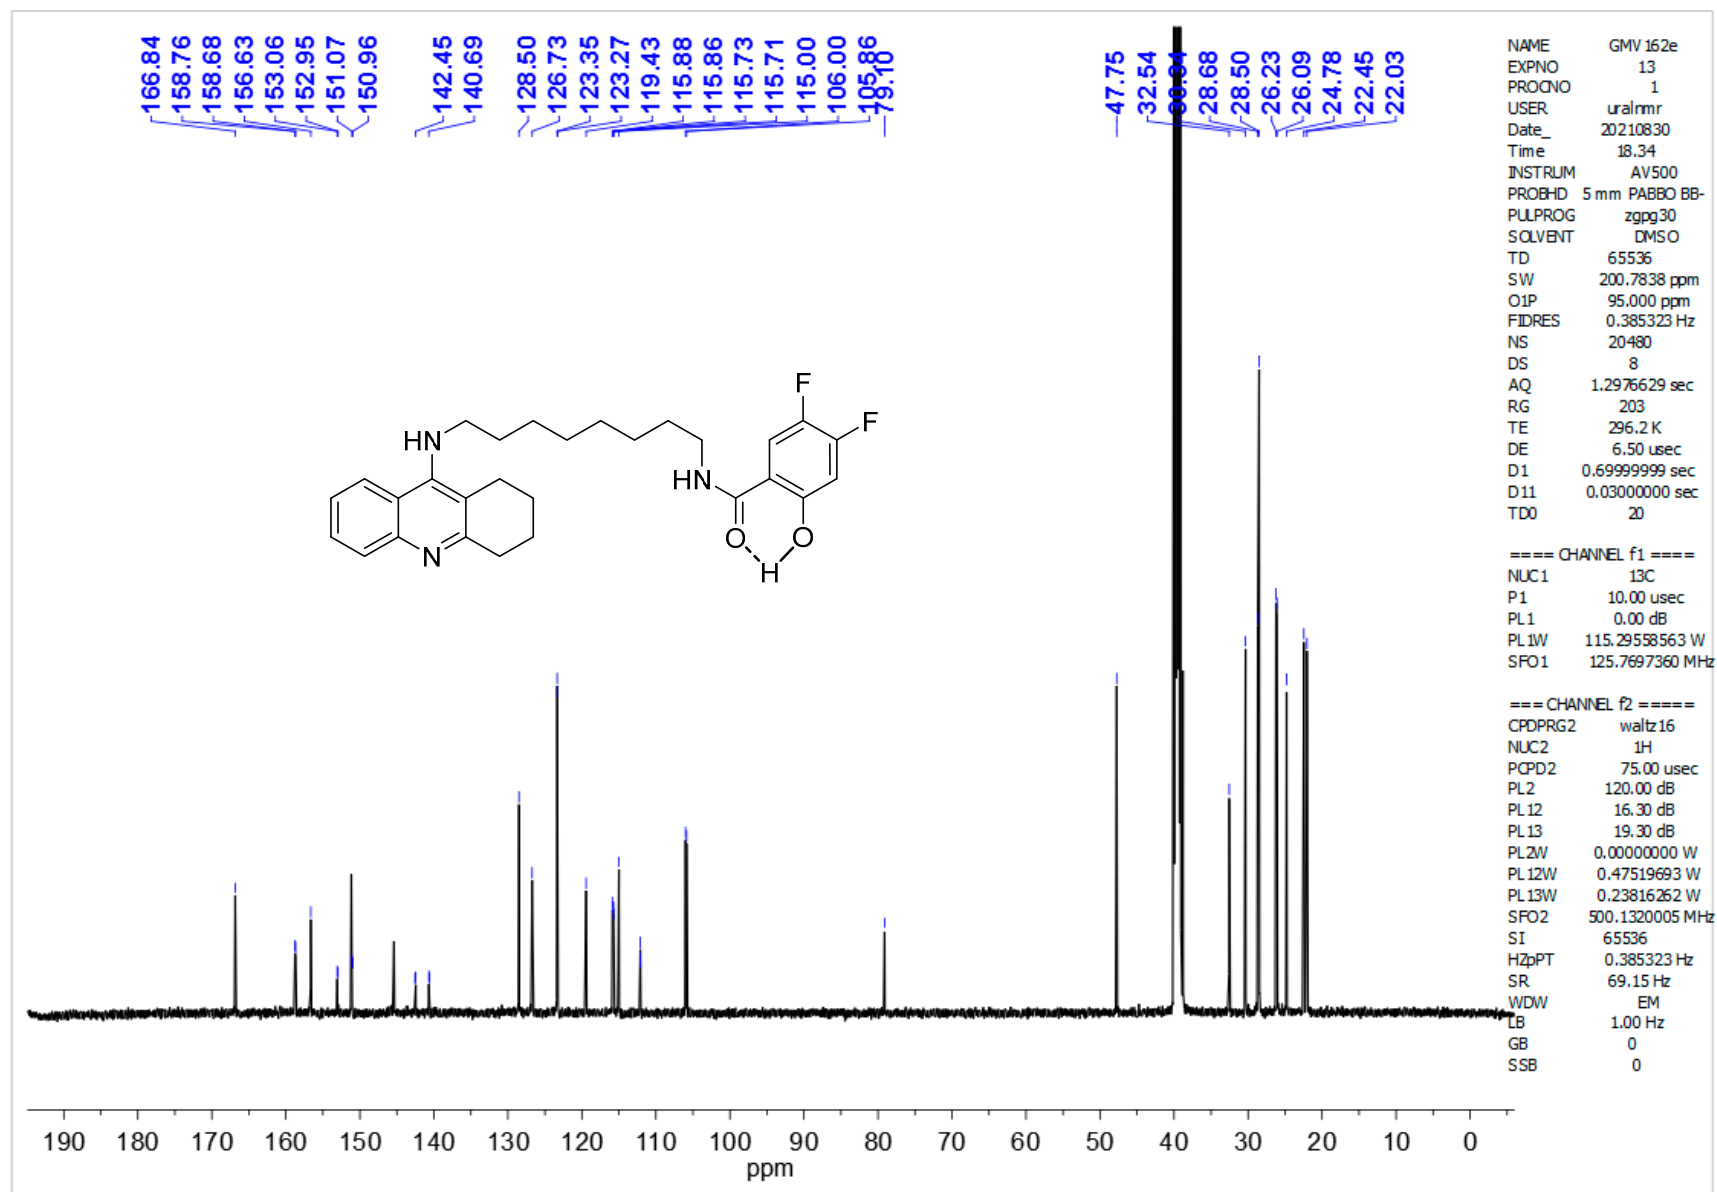

Figure S23. <sup>13</sup>C NMR spectrum of compound 7c



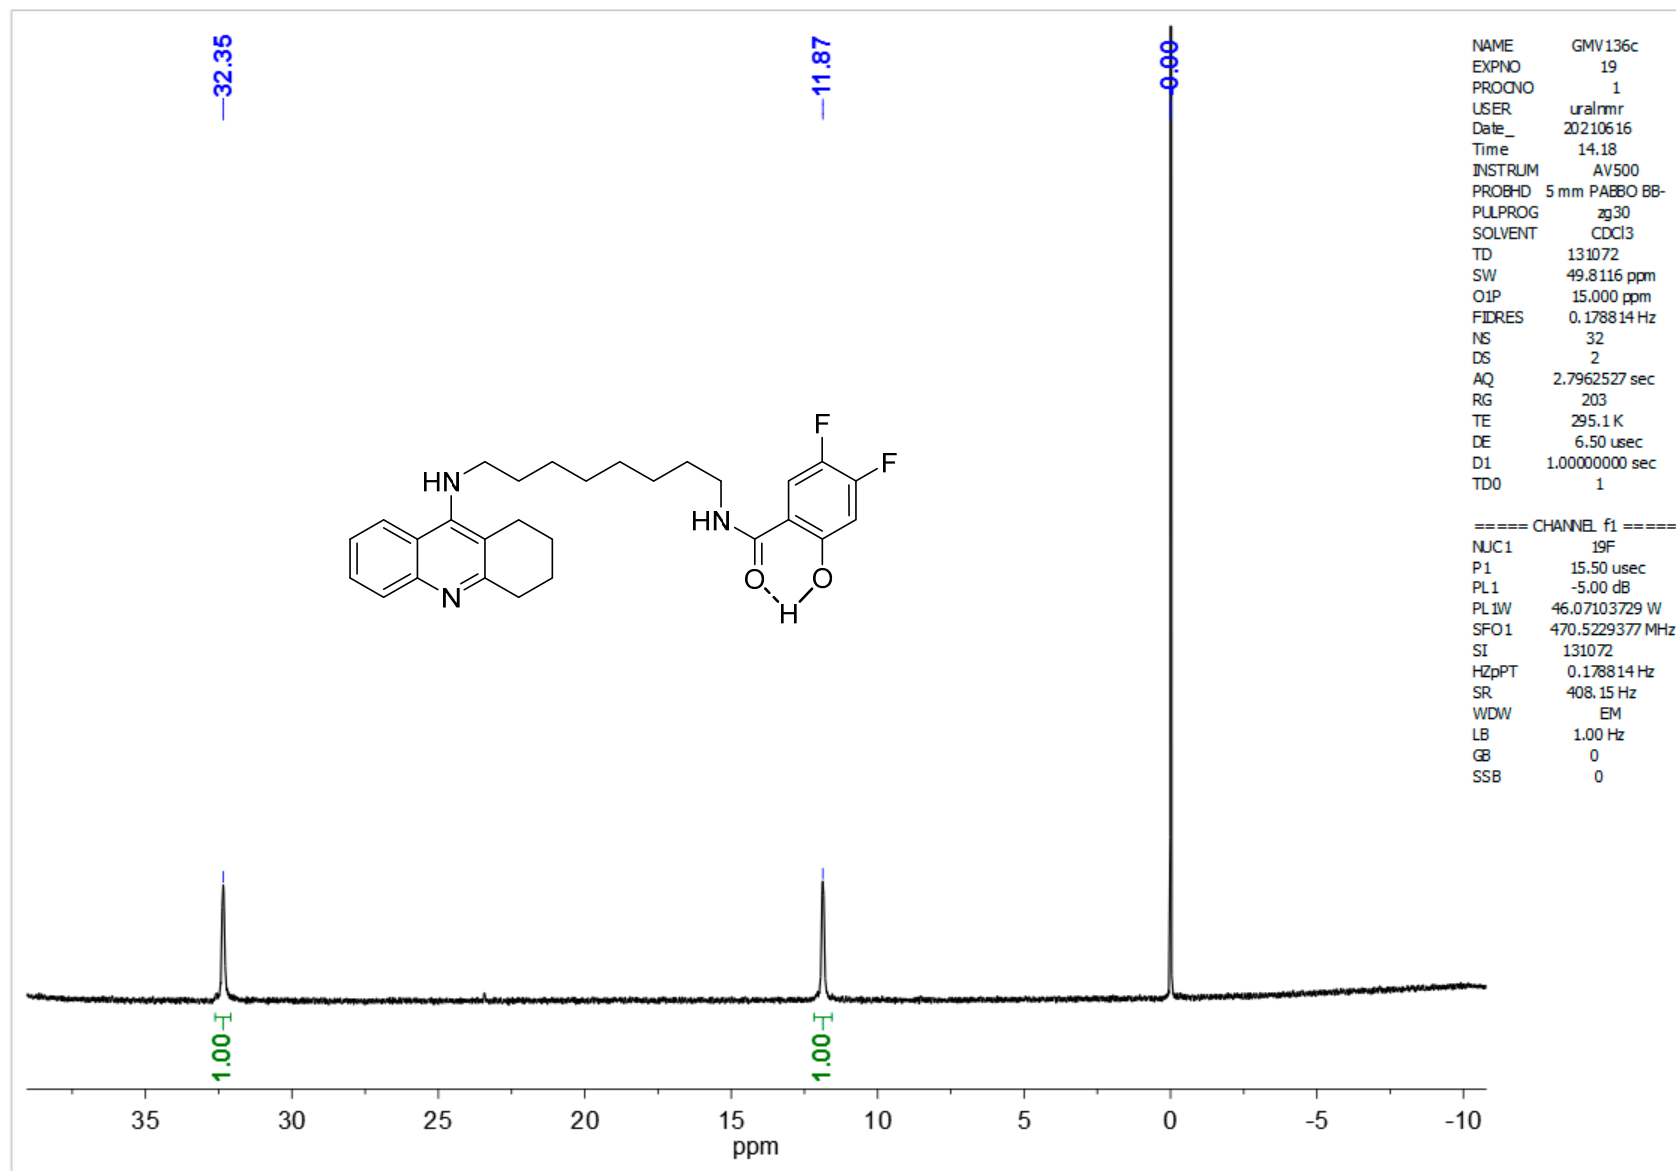

Figure S24. <sup>19</sup>F NMR spectrum of compound 7c

# Compound Spectrum SmartFormula Report

## Analysis Info

Analysis Name D:\Data\ING21\GMV-162d.23i-C.EP180.6239\_23i1230.d  
 Method EP180UI21HPC50-1600\_500-3500-0.4-4-200\_1f2002f200hrf Operator admin  
 Sample Name 70ie5lm70ce10pps6crf300-1200tt40-110\_F3x1\_Segm1.m Instrument maXis impact 1819696.00172  
 Comment 2/09/2022: +Bckgnd: 118.09, 322.05, 622.03, 922.01, 1221.99, 1521.97, 1821.95, 2121.93, 2421.91, 2721.89 (G1969-85000; +/-299.981 HPC); other intense peaks (>2\*e4): 102.13 (NEt3); 132.91 (\*2-PrOH); 391.28&413.26 (DOP); 86.10, 113.13, 140.07, 149.02, 158.96, 167.03, 187.07. 194.10, 203.14, 207.17, 209.19, 214.25, 217.10, 223.21, 227.23, 237.22, 245.19, 249.22, 251.24, 255.27, 259.20, 263.23, 265.25, 273.22, 279.16, 291.27, 293.28, 304.30, 307.30, 321.31, 326.38, 332.33, 335.33, 349.35, 413.27, 1259.95, 1307.08, 1559.93: background (prev. analyzed samples and impurities); 188.09 (#6216); 588.32 (#6218); 404.23 (#6219); 376.20 (#6220); 440.21 (#6221); 460.30 (#6224)

## Acquisition Parameter

|             |          |                      |          |                  |           |
|-------------|----------|----------------------|----------|------------------|-----------|
| Source Type | ESI      | Ion Polarity         | Positive | Set Nebulizer    | 0.4 Bar   |
| Focus       | Active   | Set Capillary        | 3500 V   | Set Dry Heater   | 200 °C    |
| Scan Begin  | 50 m/z   | Set End Plate Offset | -500 V   | Set Dry Gas      | 4.0 l/min |
| Scan End    | 1600 m/z | Set Charging Voltage | 2000 V   | Set Divert Valve | Source    |
|             |          | Set Corona           | 0 nA     | Set APCI Heater  | 0 °C      |

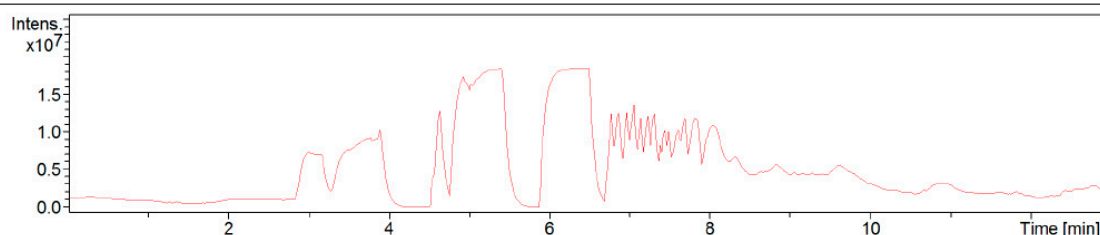

## +MS, 7.0-7.5min #403-434

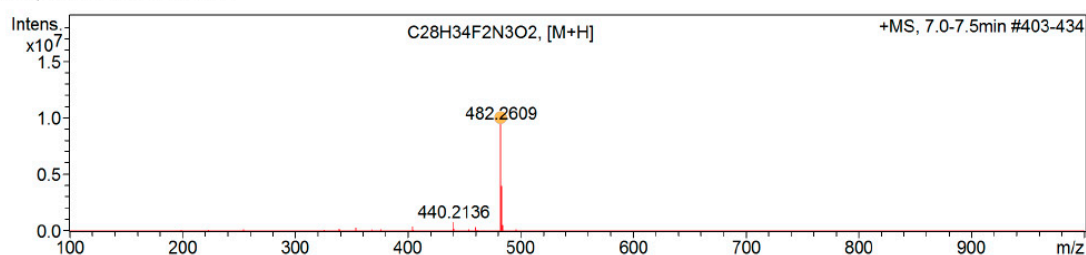

| Meas. m/z | #  | Ion Formula   | m/z      | err [ppm] | mSigma | # mSigma | Score  | rdB  | e <sup>-</sup> | Conf | N-Rule |
|-----------|----|---------------|----------|-----------|--------|----------|--------|------|----------------|------|--------|
| 482.2609  | 1  | C31H33FN3O    | 482.2602 | -1.5      | 37.9   | 1        | 100.00 | 16.5 | even           |      | ok     |
|           | 2  | C28H34F2N3O2  | 482.2614 | 0.9       | 62.1   | 2        | 41.94  | 12.5 | even           |      | ok     |
|           | 3  | C23H32N9O3    | 482.2623 | 2.7       | 80.8   | 3        | 12.69  | 12.5 | even           |      | ok     |
|           | 4  | C21H40NO11    | 482.2596 | -2.8      | 93.3   | 4        | 9.61   | 2.5  | even           |      | ok     |
|           | 5  | C22H36N5O7    | 482.2609 | -0.1      | 94.3   | 5        | 13.78  | 7.5  | even           |      | ok     |
|           | 6  | C21H31F3N9O   | 482.2598 | -2.3      | 94.3   | 6        | 7.92   | 9.5  | even           |      | ok     |
|           | 7  | C19H28N15O    | 482.2596 | -2.8      | 94.4   | 7        | 6.81   | 13.5 | even           |      | ok     |
|           | 8  | C19H37FN5O8   | 482.2621 | 2.3       | 112.9  | 8        | 3.23   | 3.5  | even           |      | ok     |
|           | 9  | C16H29FN15O2  | 482.2607 | -0.5      | 113.1  | 9        | 5.04   | 9.5  | even           |      | ok     |
|           | 10 | C13H30F2N15O3 | 482.2619 | 1.9       | 131.7  | 10       | 1.28   | 5.5  | even           |      | ok     |
|           | 11 | C12H34F2N11O7 | 482.2605 | -0.9      | 144.9  | 11       | 0.73   | 0.5  | even           |      | ok     |

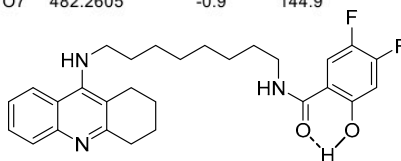

GMV-162d.23i-C.EP180.6239\_23i1230.d

Bruker Compass DataAnalysis 4.2

printed: 9/23/2021 12:56:16 PM

by: admin

Page 1 of 1

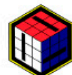

Institute of Organic Synthesis UB RAS  
 22 S. Kovalevskoy, 20 Akademicheskaya str, Yekaterinburg, Russian Federation  
 Phone: +7 (343) 362-34-56

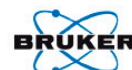

Figure S25. HMRS spectrum of compound 7c

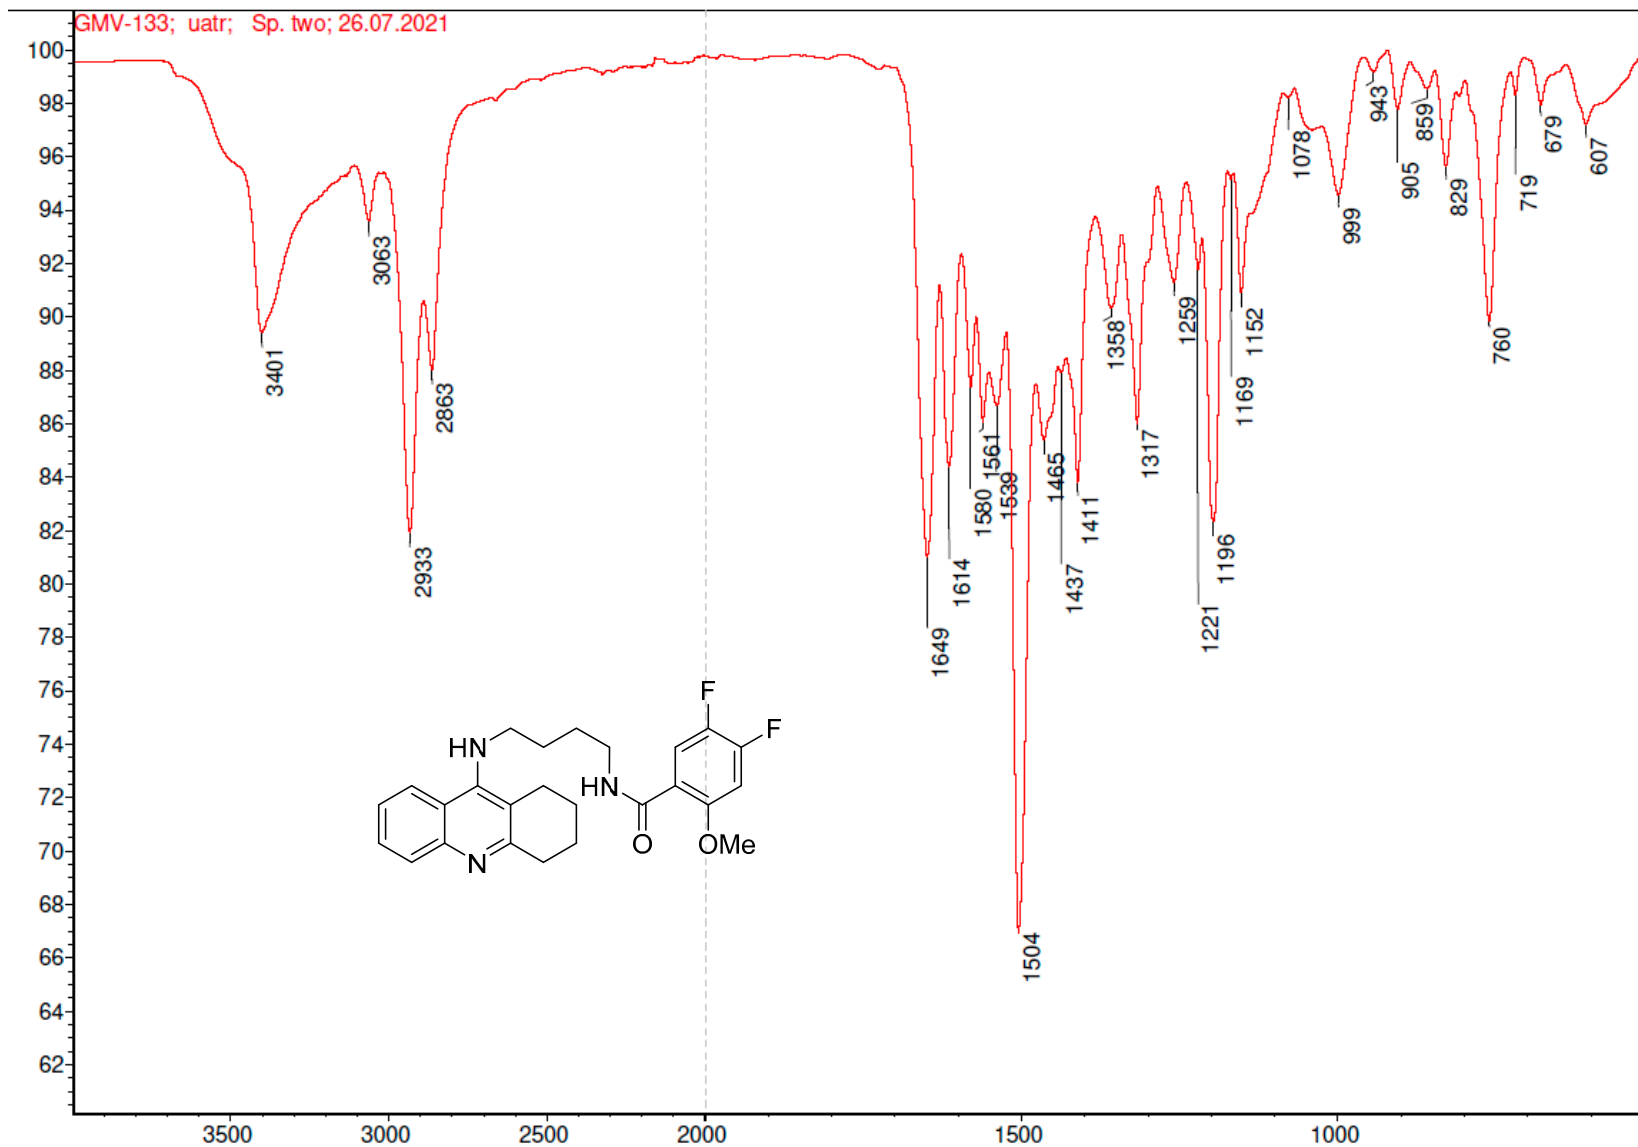

Figure S26. IR spectrum of compound 8a

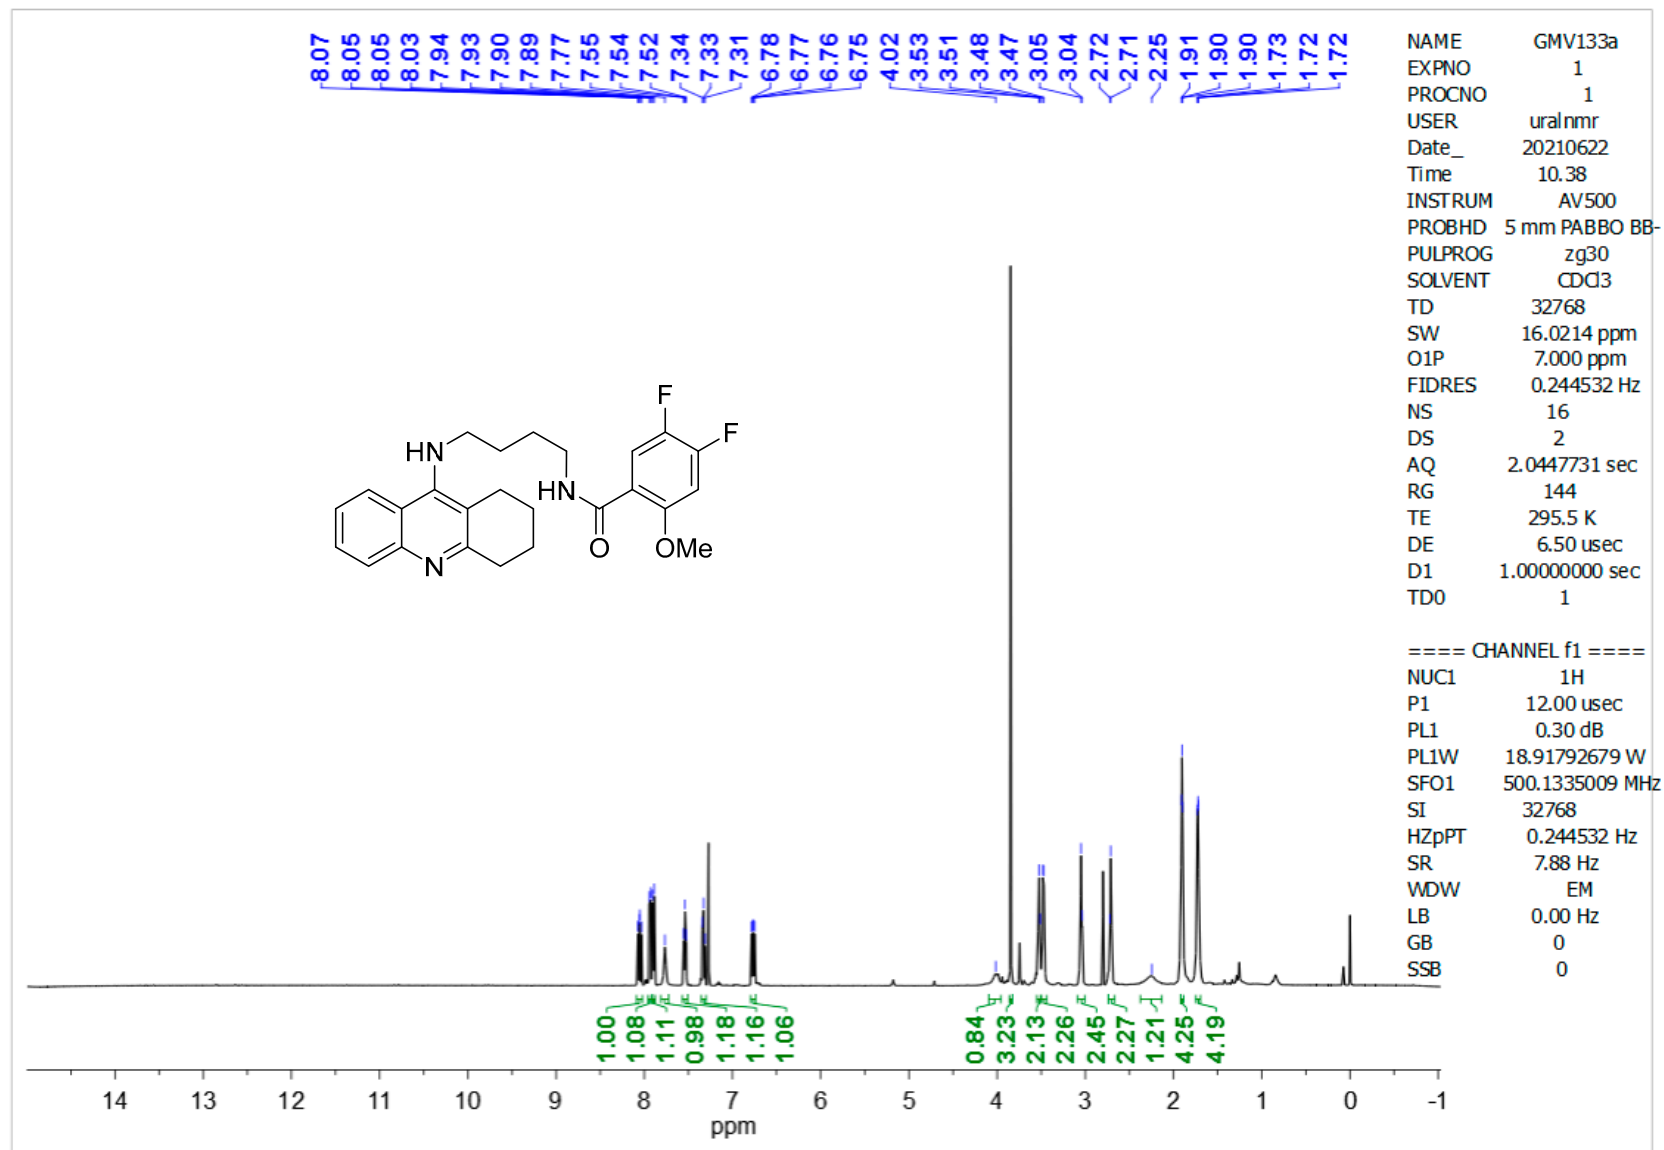

Figure S26. <sup>1</sup>H NMR spectrum of compound 8a

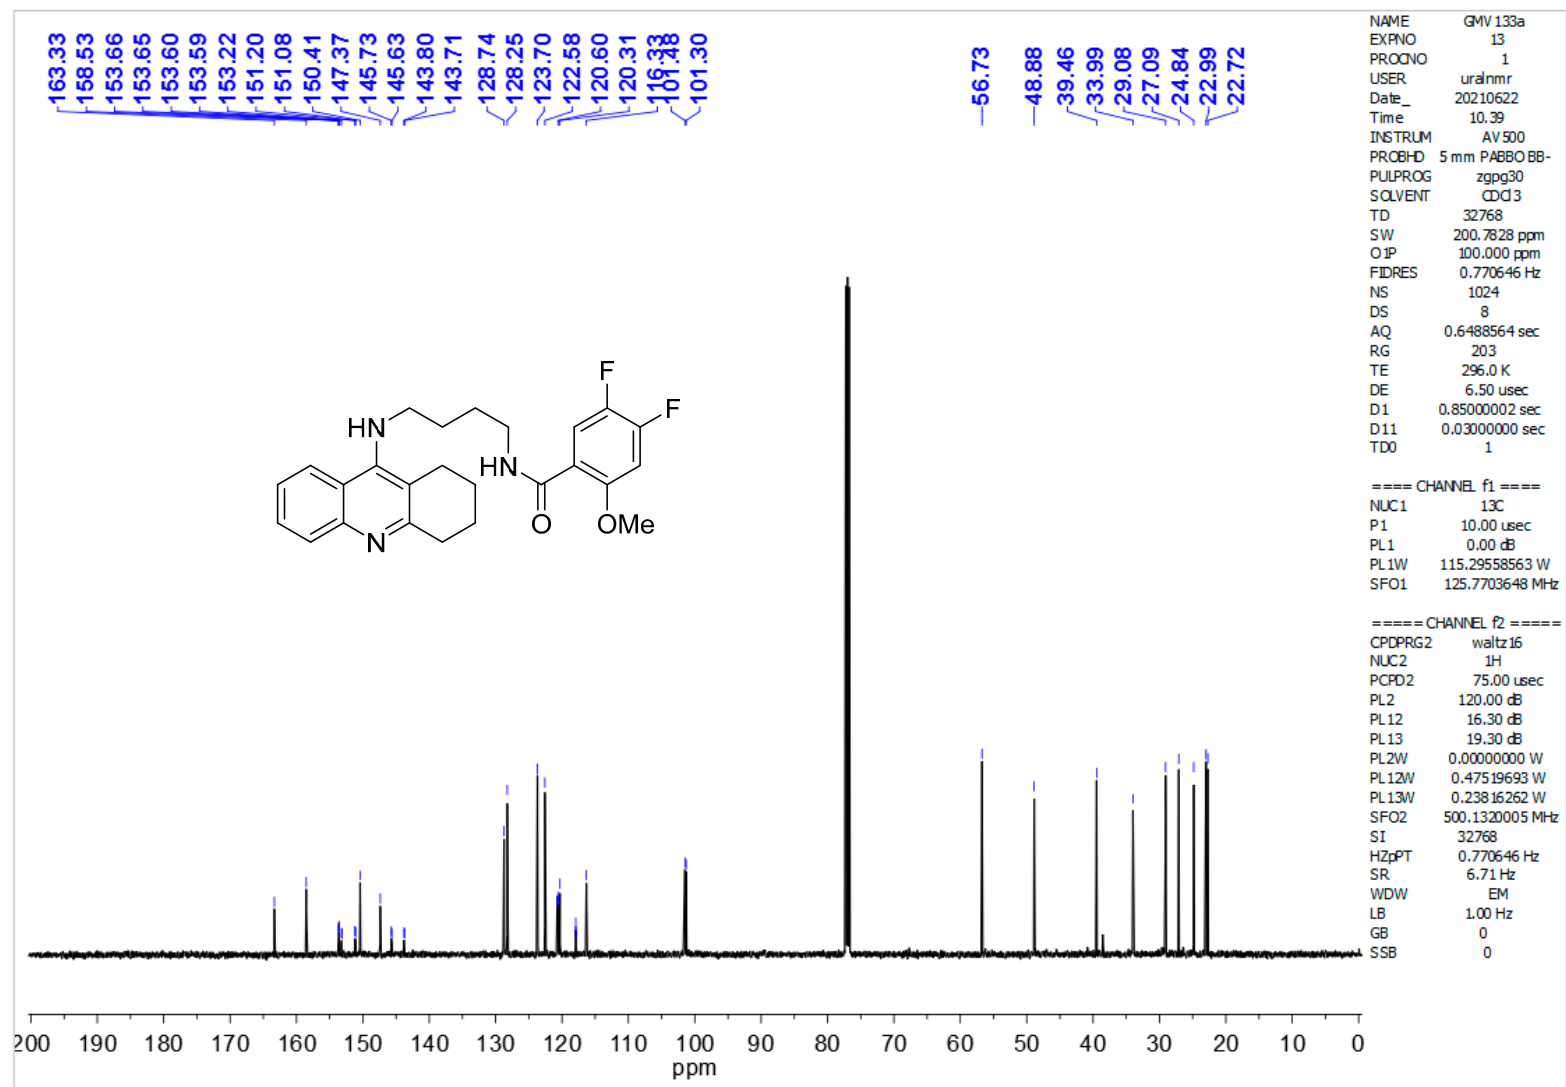

Figure S27. <sup>13</sup>C NMR spectrum of compound 8a

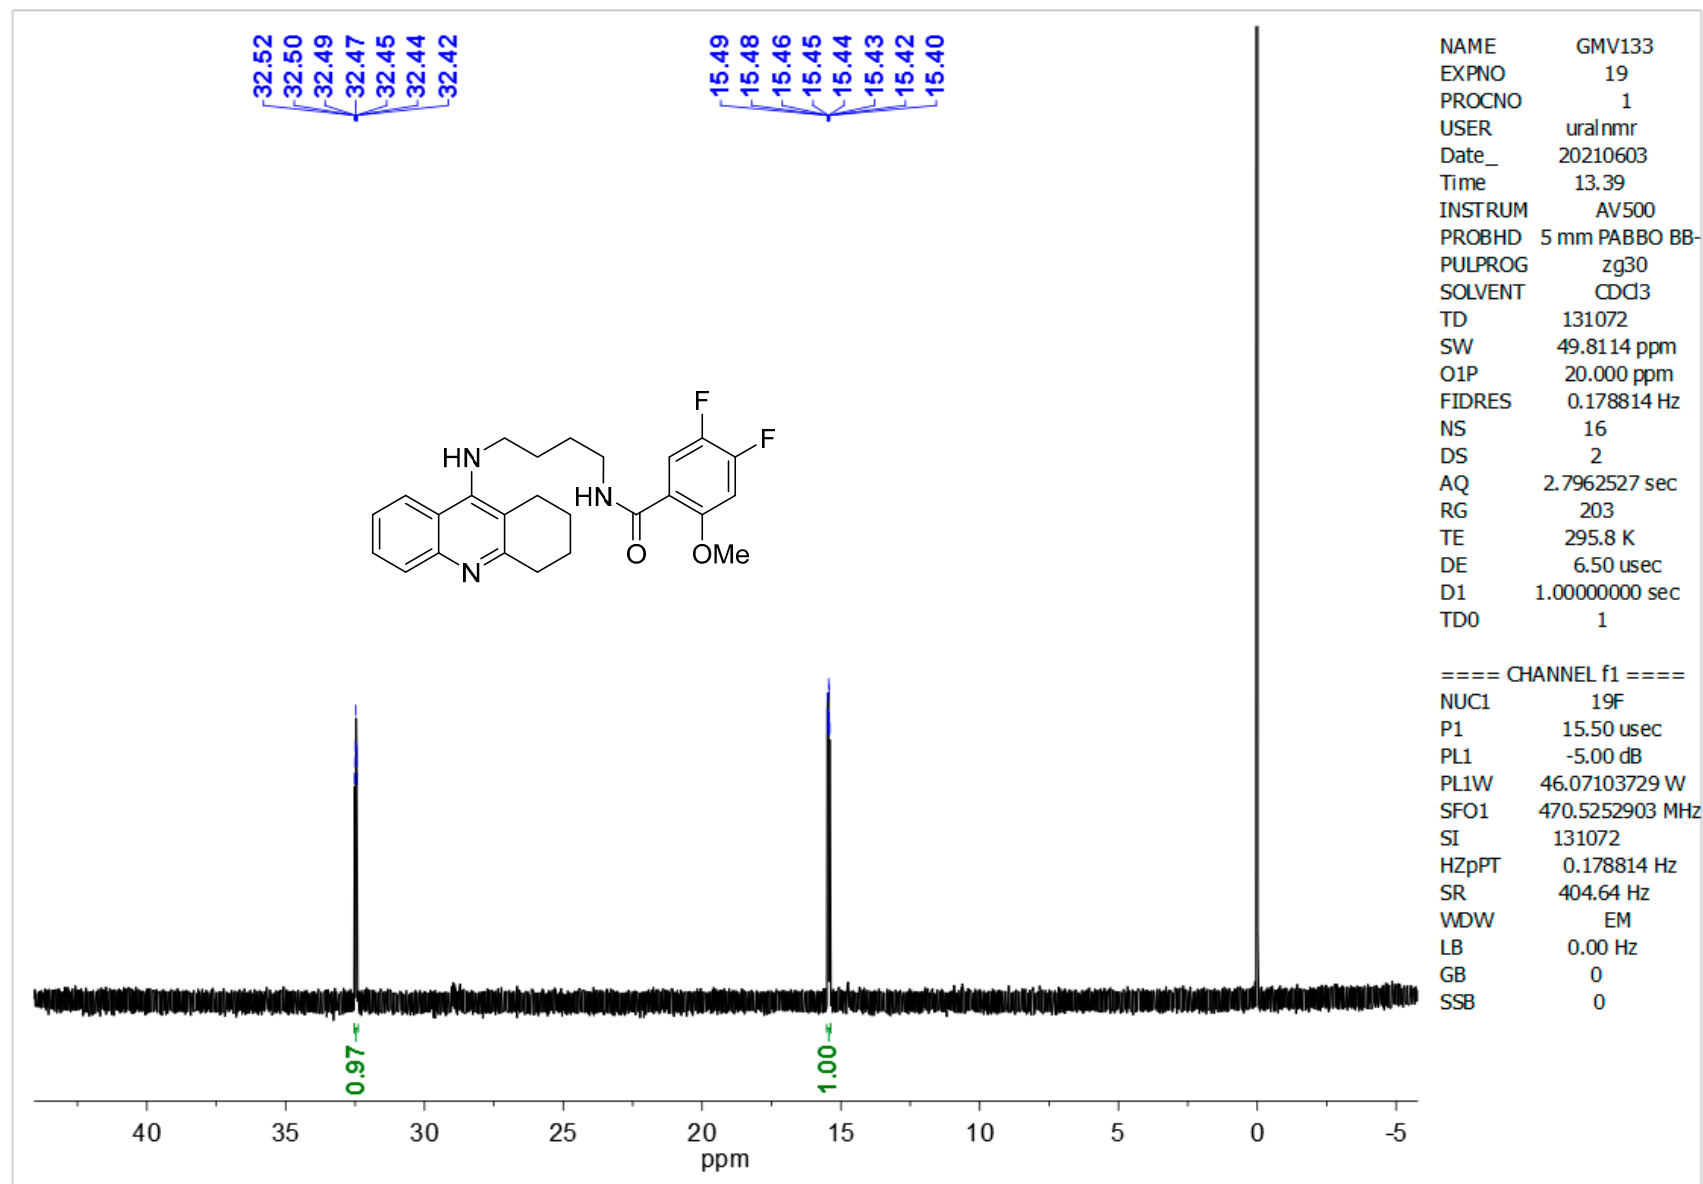

Figure S28. <sup>19</sup>F NMR spectrum of compound 8a

# Compound Spectrum SmartFormula Report

## Analysis Info

Analysis Name D:\Data\ING21\GMV-133.22i-C.EP180.6221\_22i1440.d  
 Method EP180UI21HPC50-1600\_500-3500-0.4-4-200\_1f2002f200hrf Operator admin  
 Sample Name 70ie5lm70ce10pps6crf300-1200tt40-110\_F3x1\_Segm1.m Instrument maXis impact 1819696.00172  
 Comment 22/09/2022: +Bckgnd: 118.09, 322.05, 622.03, 922.01, 1221.99, 1521.97, 1821.95, 2121.93, 2421.91, 2721.89 (G1969-85000; +/-299.981 HPC); other intense peaks (>2\*e4): 102.13 (NEt3); 132.91 (\*2-PrOH); 391.28&413.26 (DOP); 86.10, 113.13, 140.07, 149.02, 158.96, 167.03, 187.07, 194.10, 203.14, 207.17, 209.19, 214.25, 217.10, 223.21, 227.23, 237.22, 245.19, 249.22, 251.24, 255.27, 259.20, 263.23, 265.25, 273.22, 279.16, 291.27, 293.28, 304.30, 307.30, 321.31, 326.38, 332.33, 335.33, 349.35, 413.27, 1259.95, 1307.08, 1559.93: background (prev. analyzed samples and impurities); 188.09 (#6216); 588.32 (#6218); 404.23 (#6219); 376.20 (#6220)

## Acquisition Parameter

|             |          |                      |          |                  |           |
|-------------|----------|----------------------|----------|------------------|-----------|
| Source Type | ESI      | Ion Polarity         | Positive | Set Nebulizer    | 0.4 Bar   |
| Focus       | Active   | Set Capillary        | 3500 V   | Set Dry Heater   | 200 °C    |
| Scan Begin  | 50 m/z   | Set End Plate Offset | -500 V   | Set Dry Gas      | 4.0 l/min |
| Scan End    | 1600 m/z | Set Charging Voltage | 2000 V   | Set Divert Valve | Source    |
|             |          | Set Corona           | 0 nA     | Set APCI Heater  | 0 °C      |

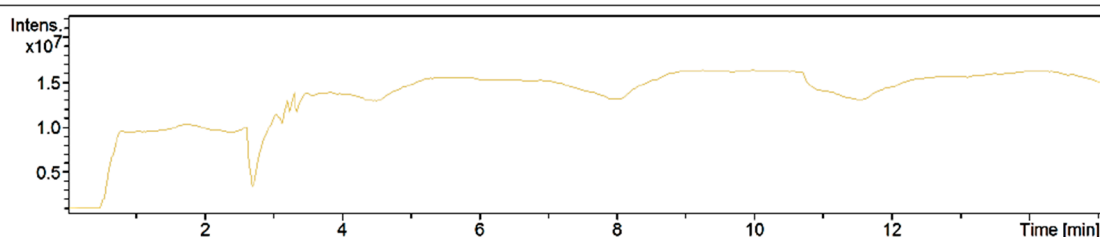

## +MS, 13.7-14.3min #791-821

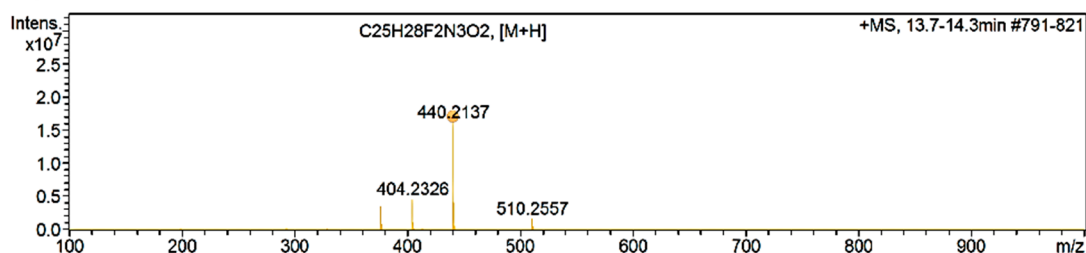

| Meas. m/z | # | Ion Formula  | m/z      | err [ppm] | mSigma | # mSigma | Score  | rdb  | e <sup>-</sup> Conf | N-Rule |
|-----------|---|--------------|----------|-----------|--------|----------|--------|------|---------------------|--------|
| 440.2137  | 1 | C25H28F2N3O2 | 440.2144 | 1.7       | 15.0   | 1        | 87.43  | 12.5 | even                | ok     |
|           | 2 | C19H30N5O7   | 440.2140 | 0.7       | 18.8   | 2        | 100.00 | 7.5  | even                | ok     |
|           | 3 | C28H27FN3O   | 440.2133 | -0.9      | 33.8   | 3        | 67.65  | 16.5 | even                | ok     |

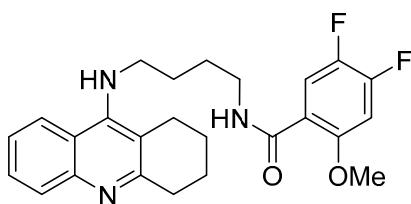

GMV-133.22i-C.EP180.6221\_22i1440.d

Bruker Compass DataAnalysis 4.2

printed: 9/22/2021 4:19:21 PM

by: admin

Page 1 of 1

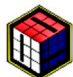

Institute of Organic Synthesis UB RAS  
 22 S.Kovalevskoy, 20 Akademicheskaya str, Yekaterinburg, Russian Federation  
 Phone: +7 (343) 362-34-56

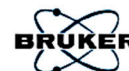

Figure S29. HRMS spectrum of compound 8a

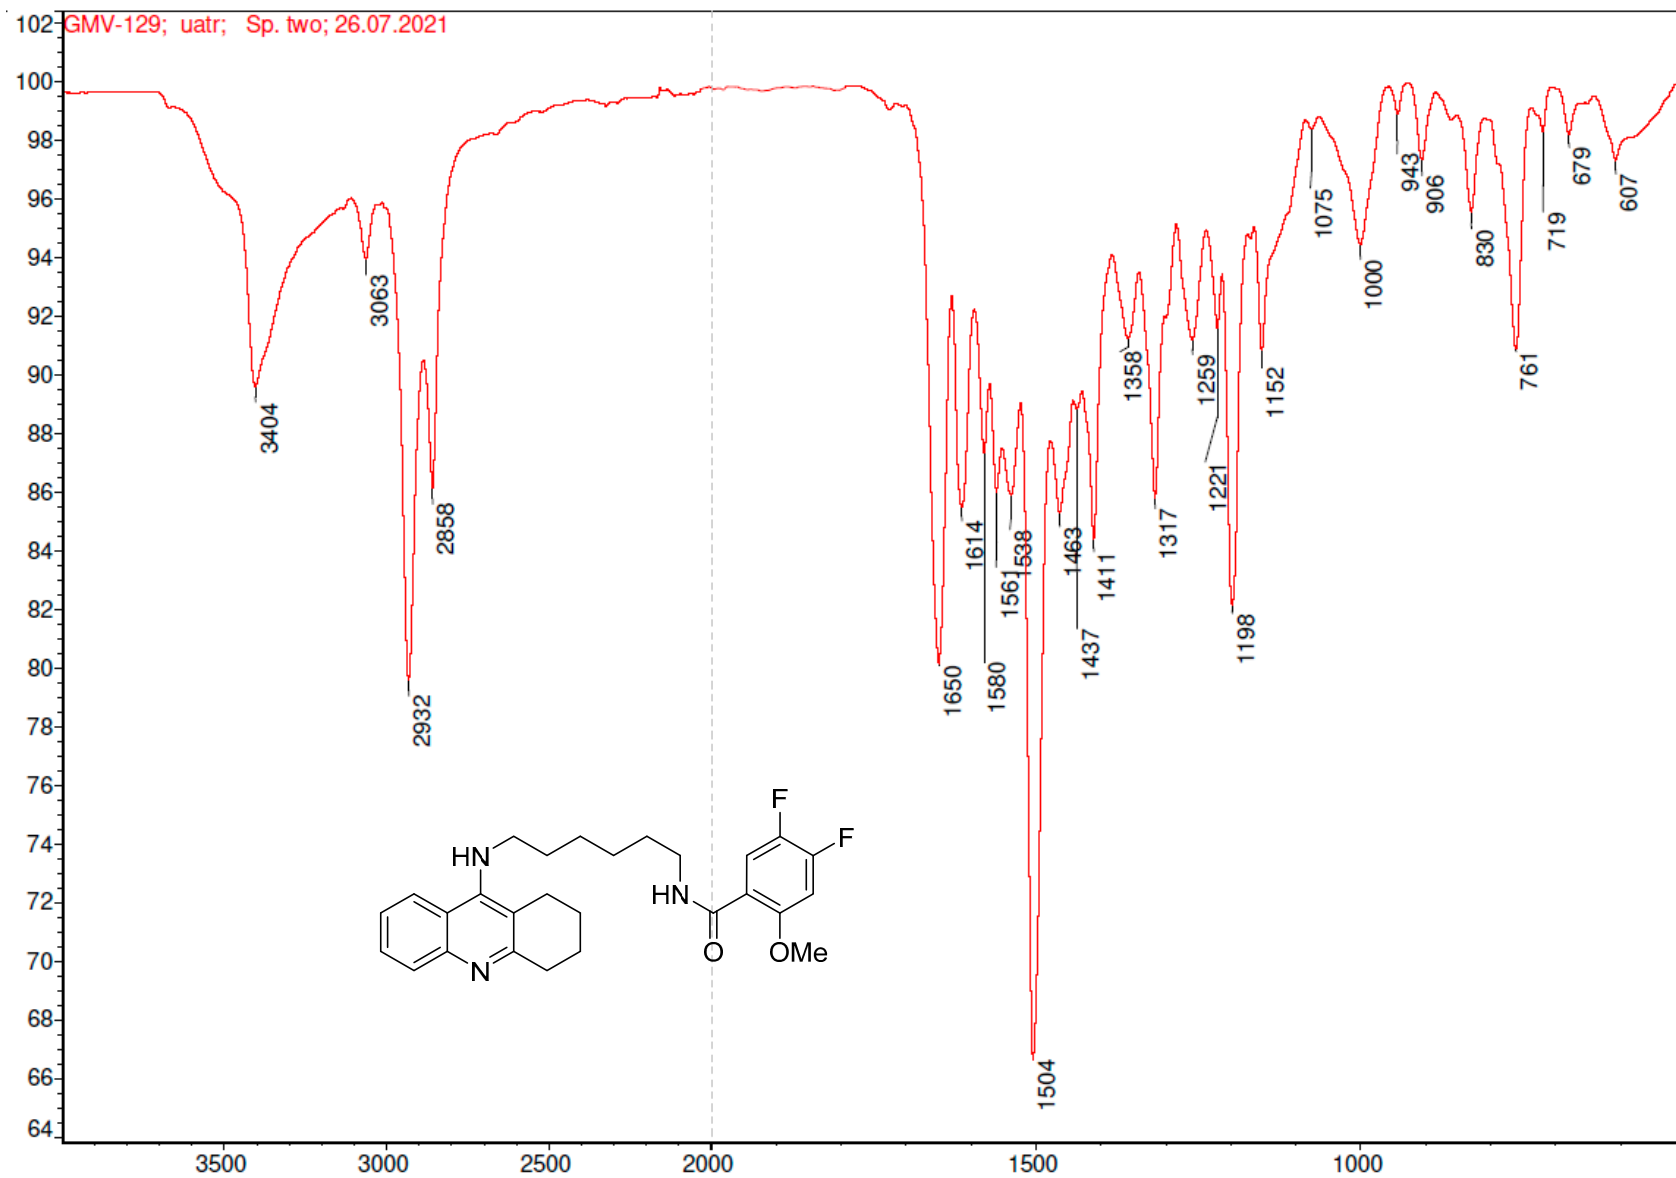

Figure S30. IR spectrum of compound 8b



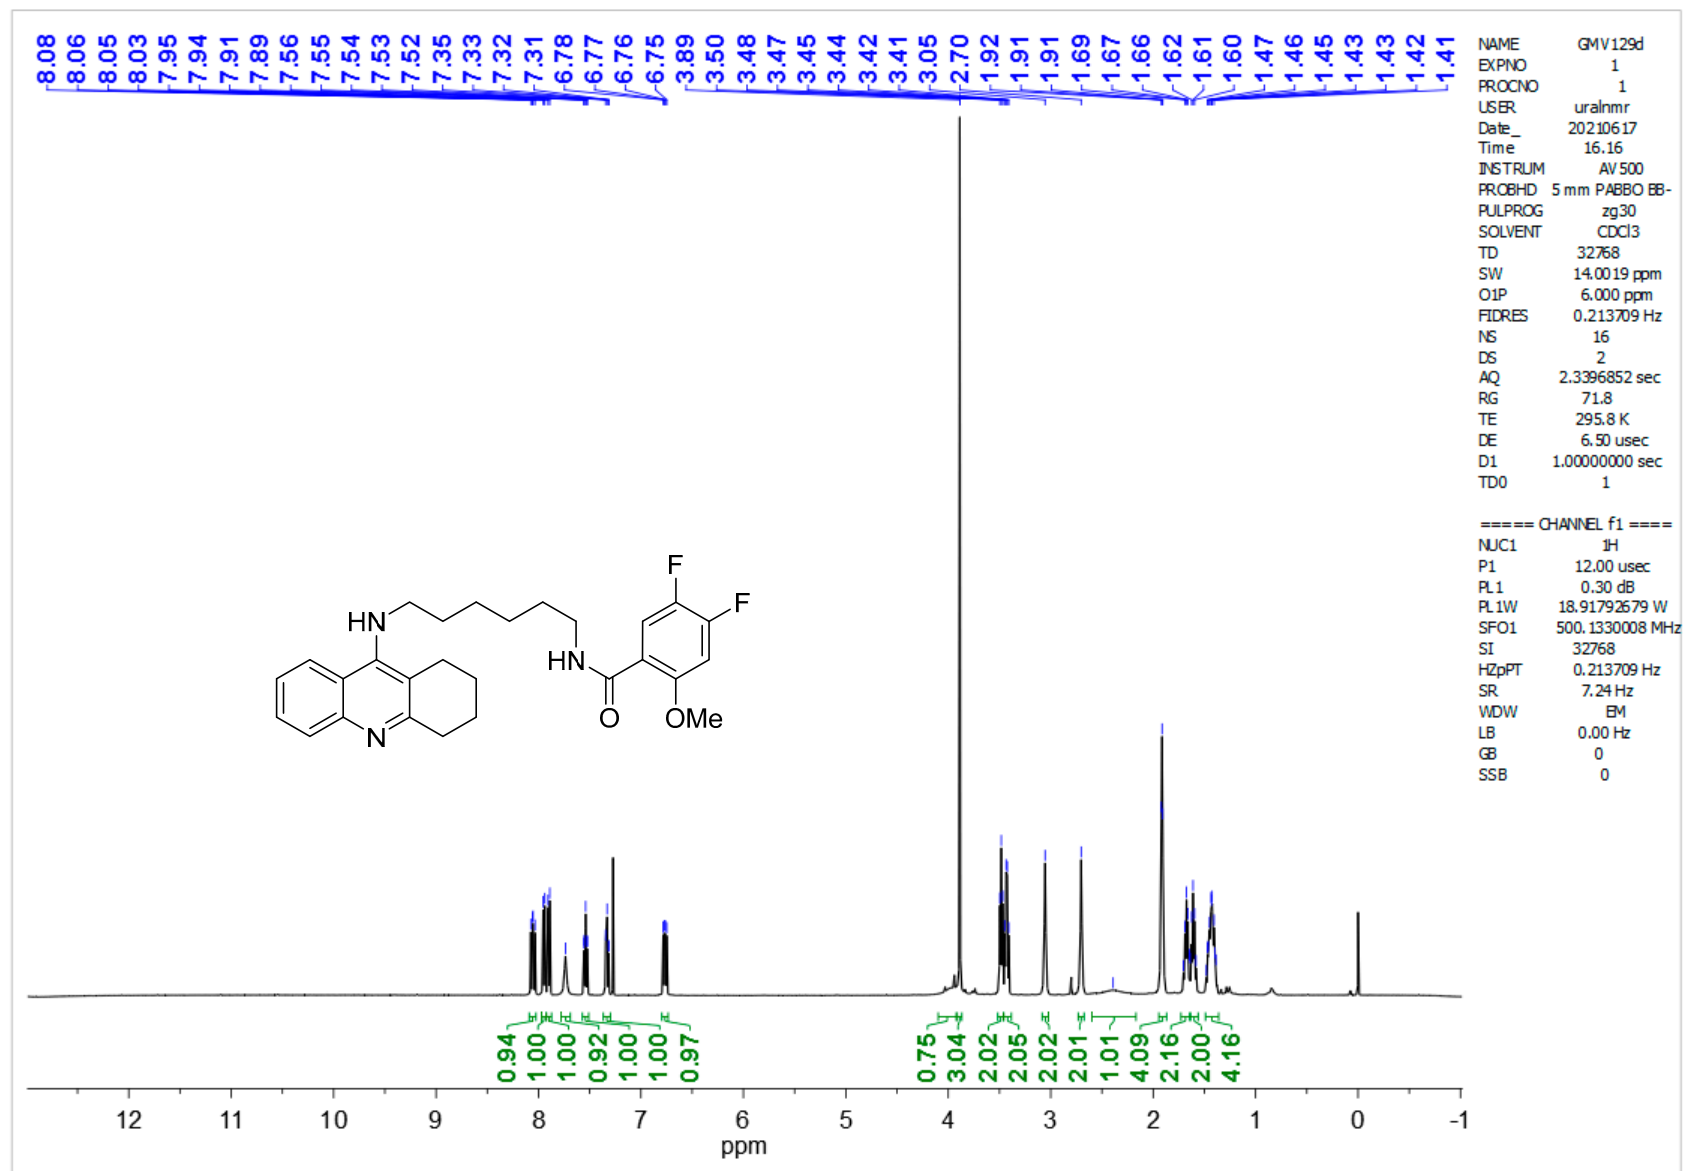

Figure S31. <sup>1</sup>H NMR spectrum of compound 8b

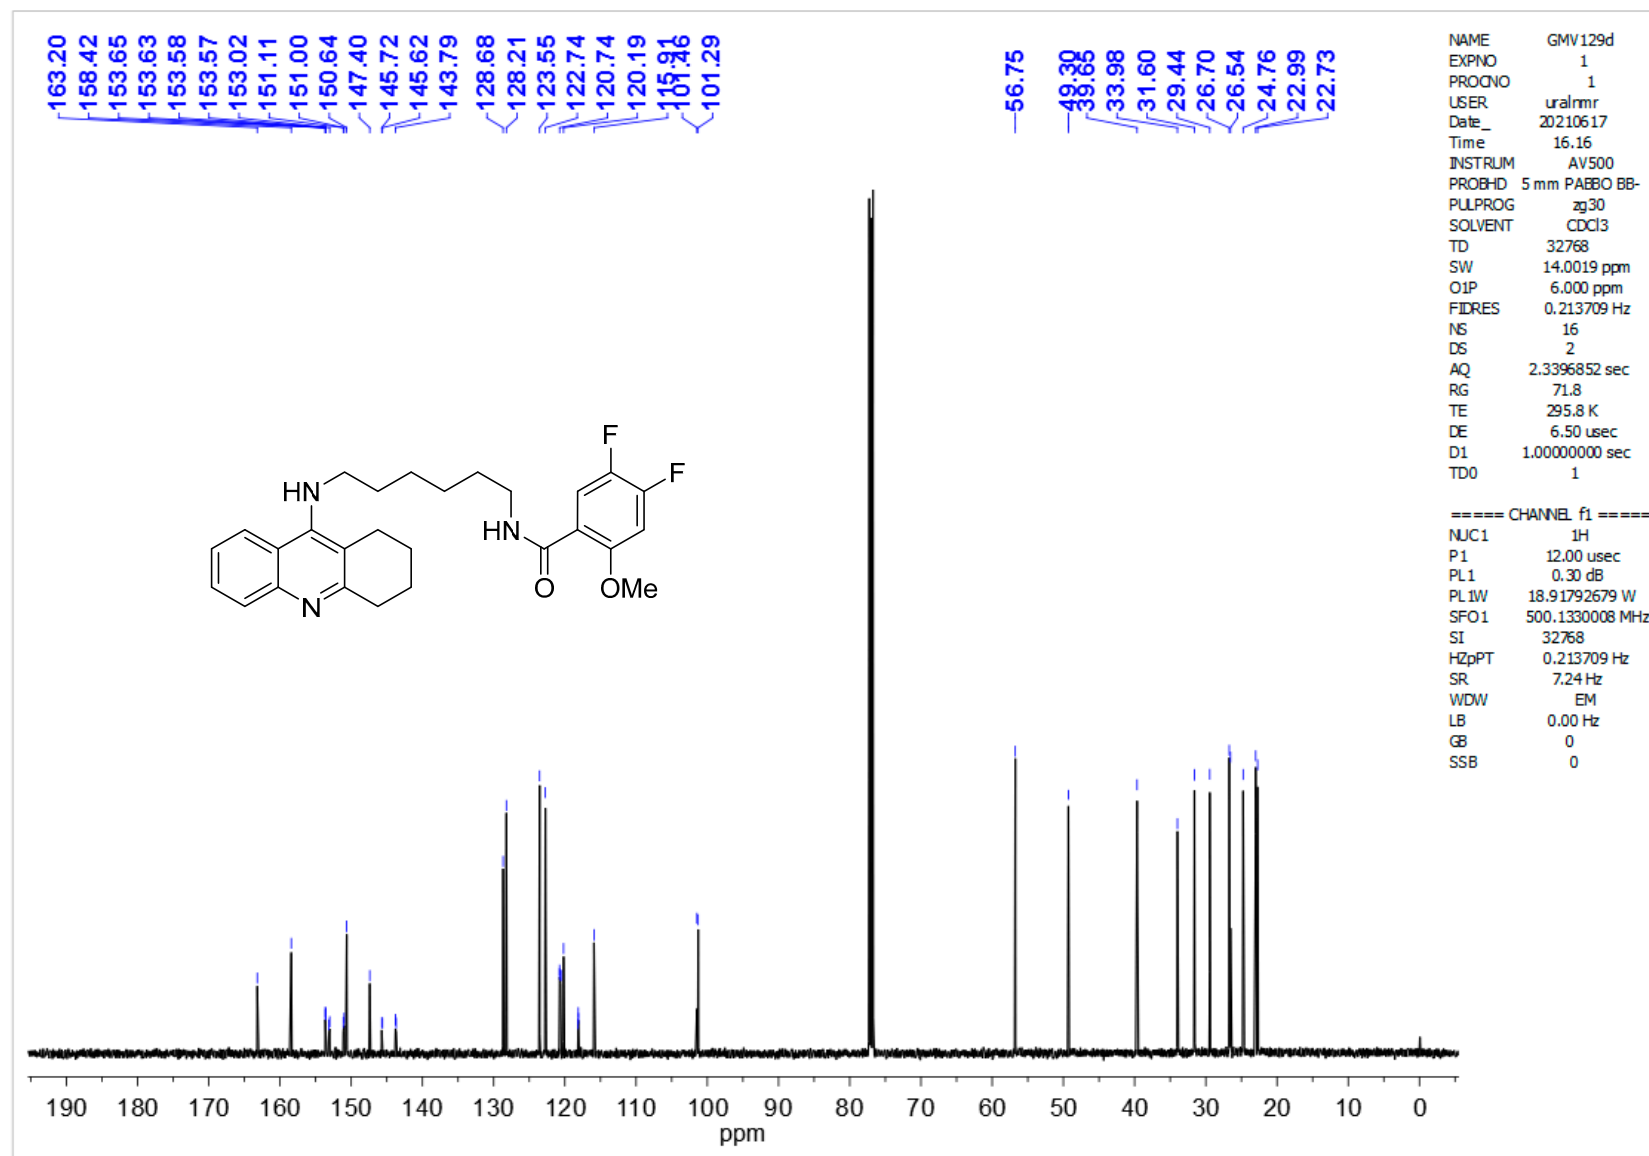

Figure S33.  $^{13}\text{C}$  NMR spectrum of compound **8b**

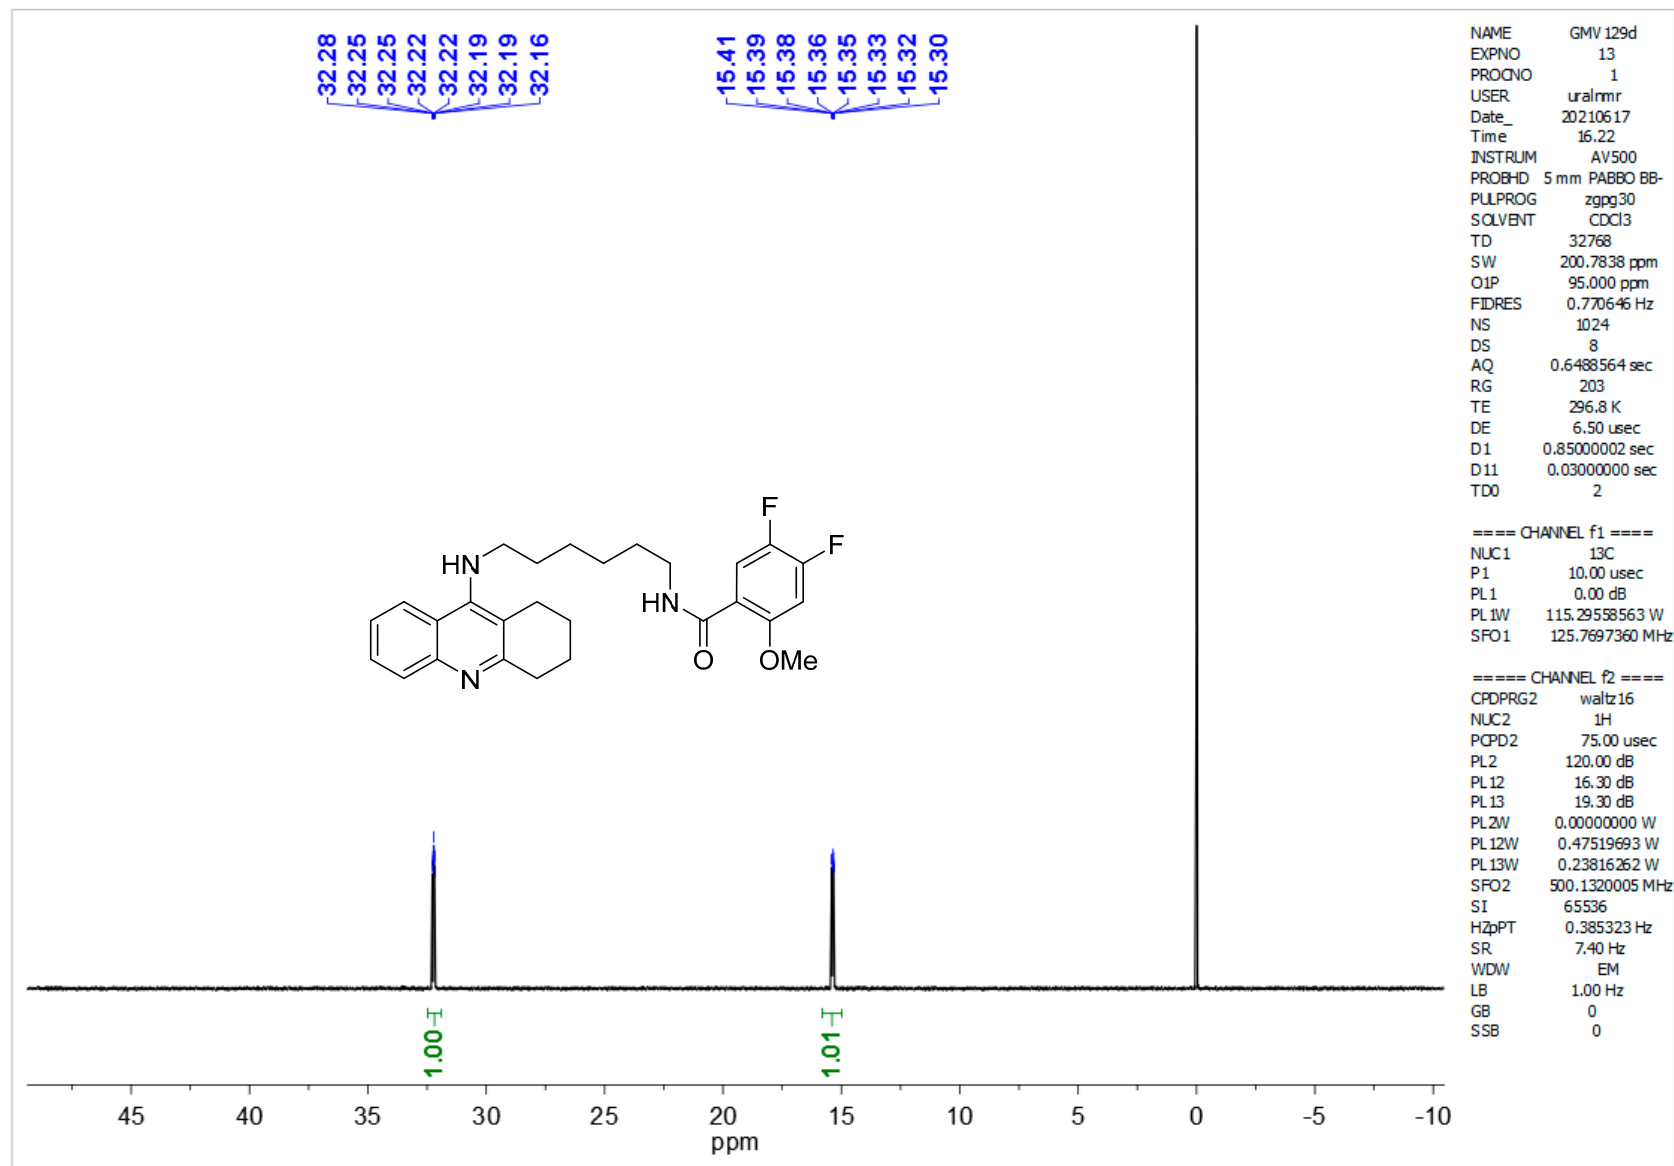

**Figure S34.**  $^{19}\text{F}$  NMR spectrum of compound **8b**

# Compound Spectrum SmartFormula Report

## Analysis Info

Analysis Name D:\Data\ING21\GMV-129.25F-C.6122\_EP\_22\_01\_1072.d  
Method ep180\_50-1300\_tuneosstd-hoona-uf19\_1f2002f200hrf80ie5lOperator admin

Acquisition Date 6/25/2021 4:20:38 PM

Sample Name GMV-129.25F-C.6122\_EP  
Comment

Instrument maXis impact 1819696.00172

## Acquisition Parameter

|             |          |                      |          |                  |           |
|-------------|----------|----------------------|----------|------------------|-----------|
| Source Type | ESI      | Ion Polarity         | Positive | Set Nebulizer    | 4.0 Bar   |
| Focus       | Active   | Set Capillary        | 3500 V   | Set Dry Heater   | 200 °C    |
| Scan Begin  | 50 m/z   | Set End Plate Offset | -500 V   | Set Dry Gas      | 8.0 l/min |
| Scan End    | 1300 m/z | Set Charging Voltage | 2000 V   | Set Divert Valve | Source    |
|             |          | Set Corona           | 0 nA     | Set APCI Heater  | 0 °C      |

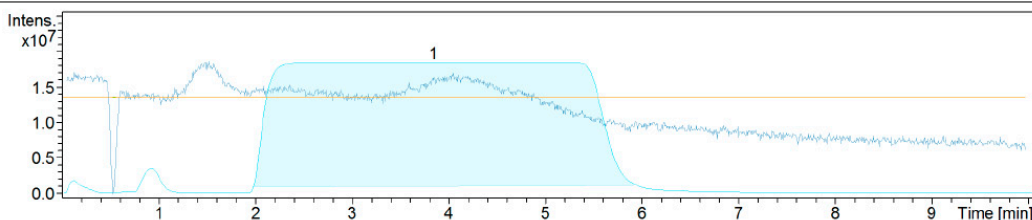

| # | RT [min] | Area       | Int. Type | I        | S/N    | Chromatogram | Max. m/z | FWHM [min] |
|---|----------|------------|-----------|----------|--------|--------------|----------|------------|
| 1 | 3.8      | 3662201856 | Manual    | 18331640 | 7520.5 | BPC +All MS  | 468.2456 |            |

## Cmpd 1, 3.8 min

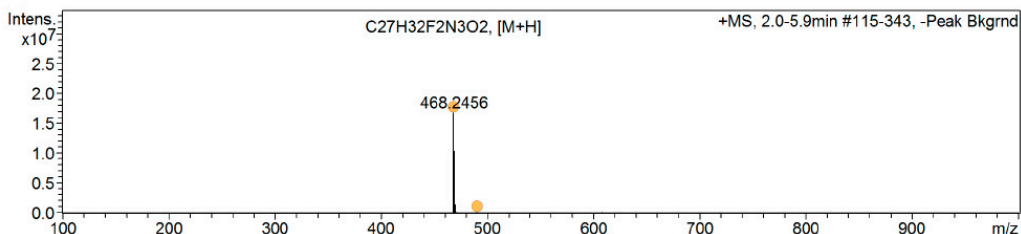

| Meas. m/z | # | Ion Formula     | m/z      | err [ppm] | mSigma | # mSigma | Score  | rdb  | e <sup>-</sup> Conf | N-Rule |
|-----------|---|-----------------|----------|-----------|--------|----------|--------|------|---------------------|--------|
| 468.2456  | 1 | C27H32F2N3O2    | 468.2457 | 0.3       | 181.3  | 1        | 100.00 | 12.5 | even                | ok     |
|           | 2 | C21H34N5O7      | 468.2453 | -0.6      | 213.4  | 2        | 6.39   | 7.5  | even                | ok     |
|           | 3 | C18H35FN5O8     | 468.2464 | 1.8       | 232.1  | 3        | 0.85   | 3.5  | even                | ok     |
|           | 4 | C15H27FN15O2    | 468.2451 | -1.1      | 232.4  | 4        | 0.99   | 9.5  | even                | ok     |
|           | 5 | C12H28F2N15O3   | 468.2462 | 1.4       | 251.0  | 5        | 0.14   | 5.5  | even                | ok     |
|           | 6 | C11H32F2N11O7   | 468.2449 | -1.5      | 264.2  | 6        | 0.03   | 0.5  | even                | ok     |
|           | 1 | C17H32FN9NaO4   | 468.2453 | -0.5      | 231.5  | 1        | 100.00 | 5.5  | even                | ok     |
|           | 2 | C14H33F2N9NaO5  | 468.2465 | 2.0       | 250.1  | 2        | 10.94  | 1.5  | even                | ok     |
| 490.2261  | 1 | C15H26FN15NaO2  | 490.2270 | 2.0       | 39.2   | 1        | 100.00 | 9.5  | even                | ok     |
|           | 1 | C11H31F2N11NaO7 | 490.2268 | 1.6       | 70.2   | 1        | 100.00 | 0.5  | even                | ok     |

## +MS, 6.1-6.5min #352-377

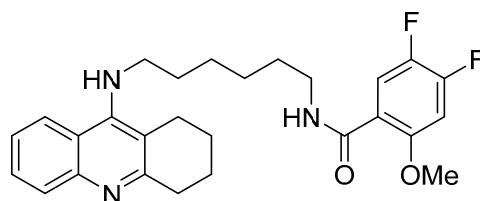

GMV-129.25F-C.6122\_EP\_22\_01\_1072.d

Bruker Compass DataAnalysis 4.2

printed: 6/25/2021 5:27:23 PM

by: admin

Page 1 of 2

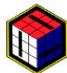

Institute of Organic Synthesis UB RAS  
22 S.Kovalevskoy, 20 Akademicheskaya str, Yekaterinburg, Russian Federation  
Phone: +7 (343) 362-34-56

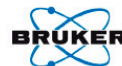

Figure S35. HRMS spectrum of compound 8b

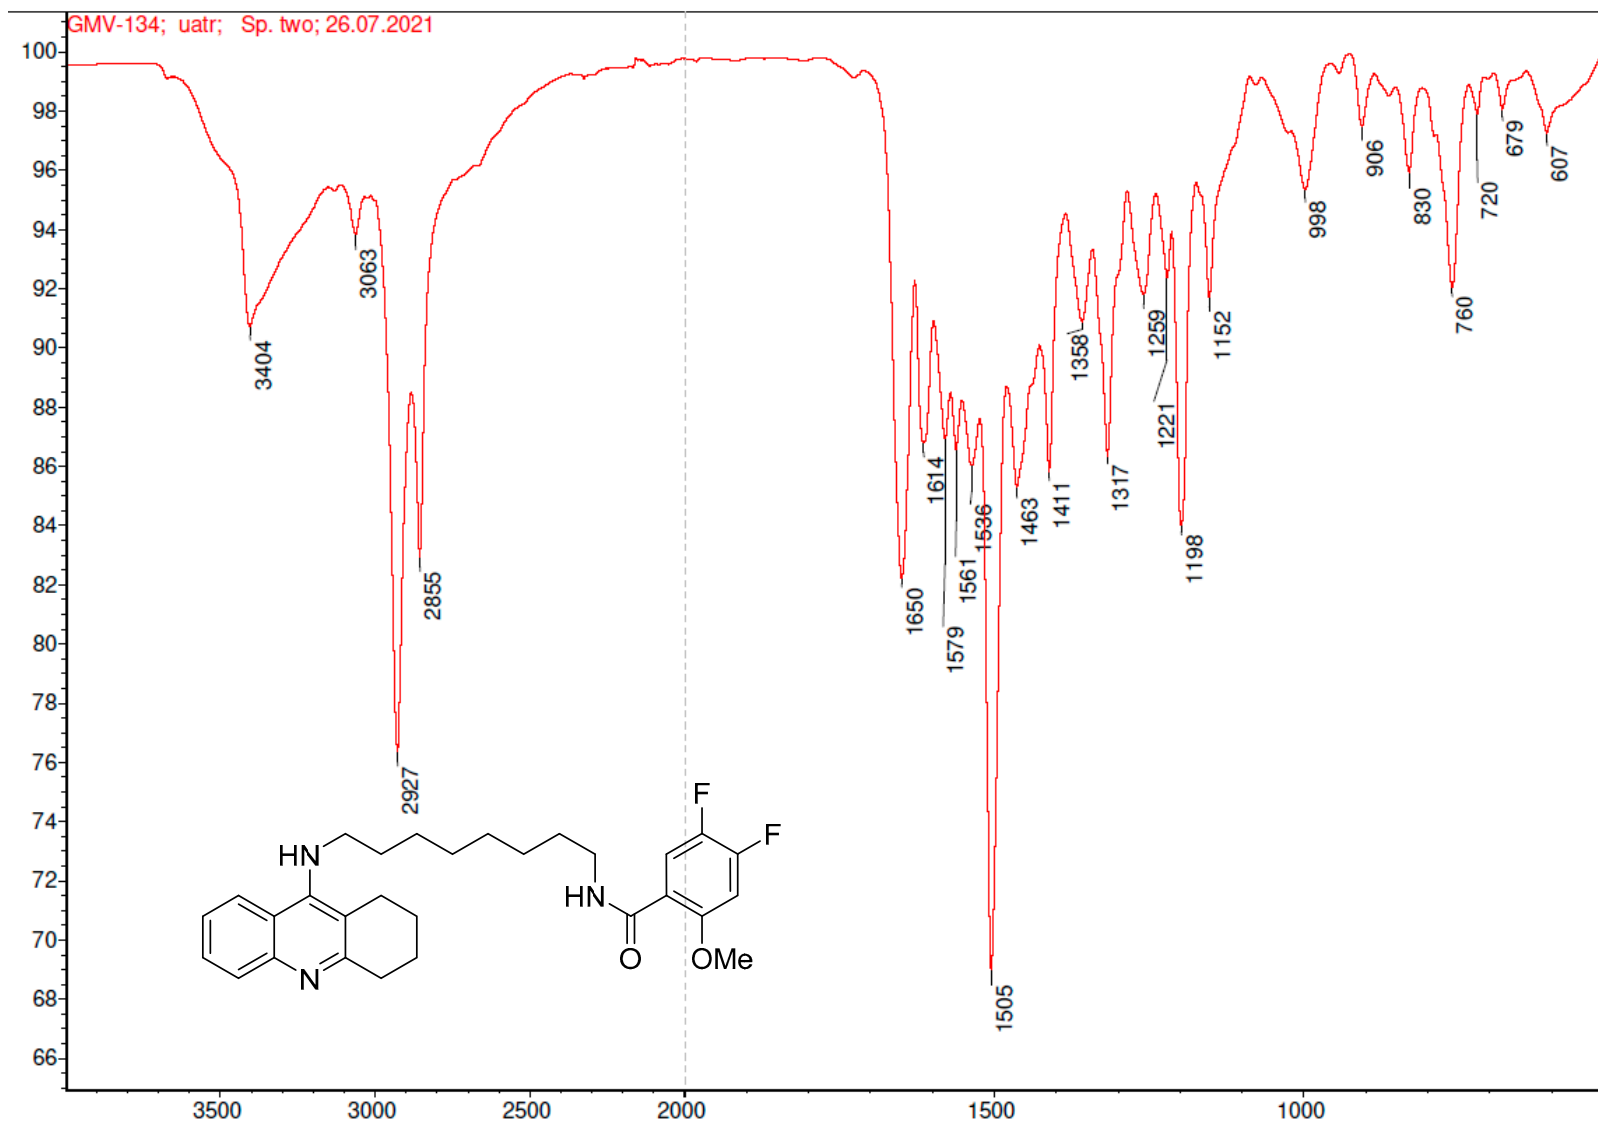

Figure S36. IR spectrum of compound 8c

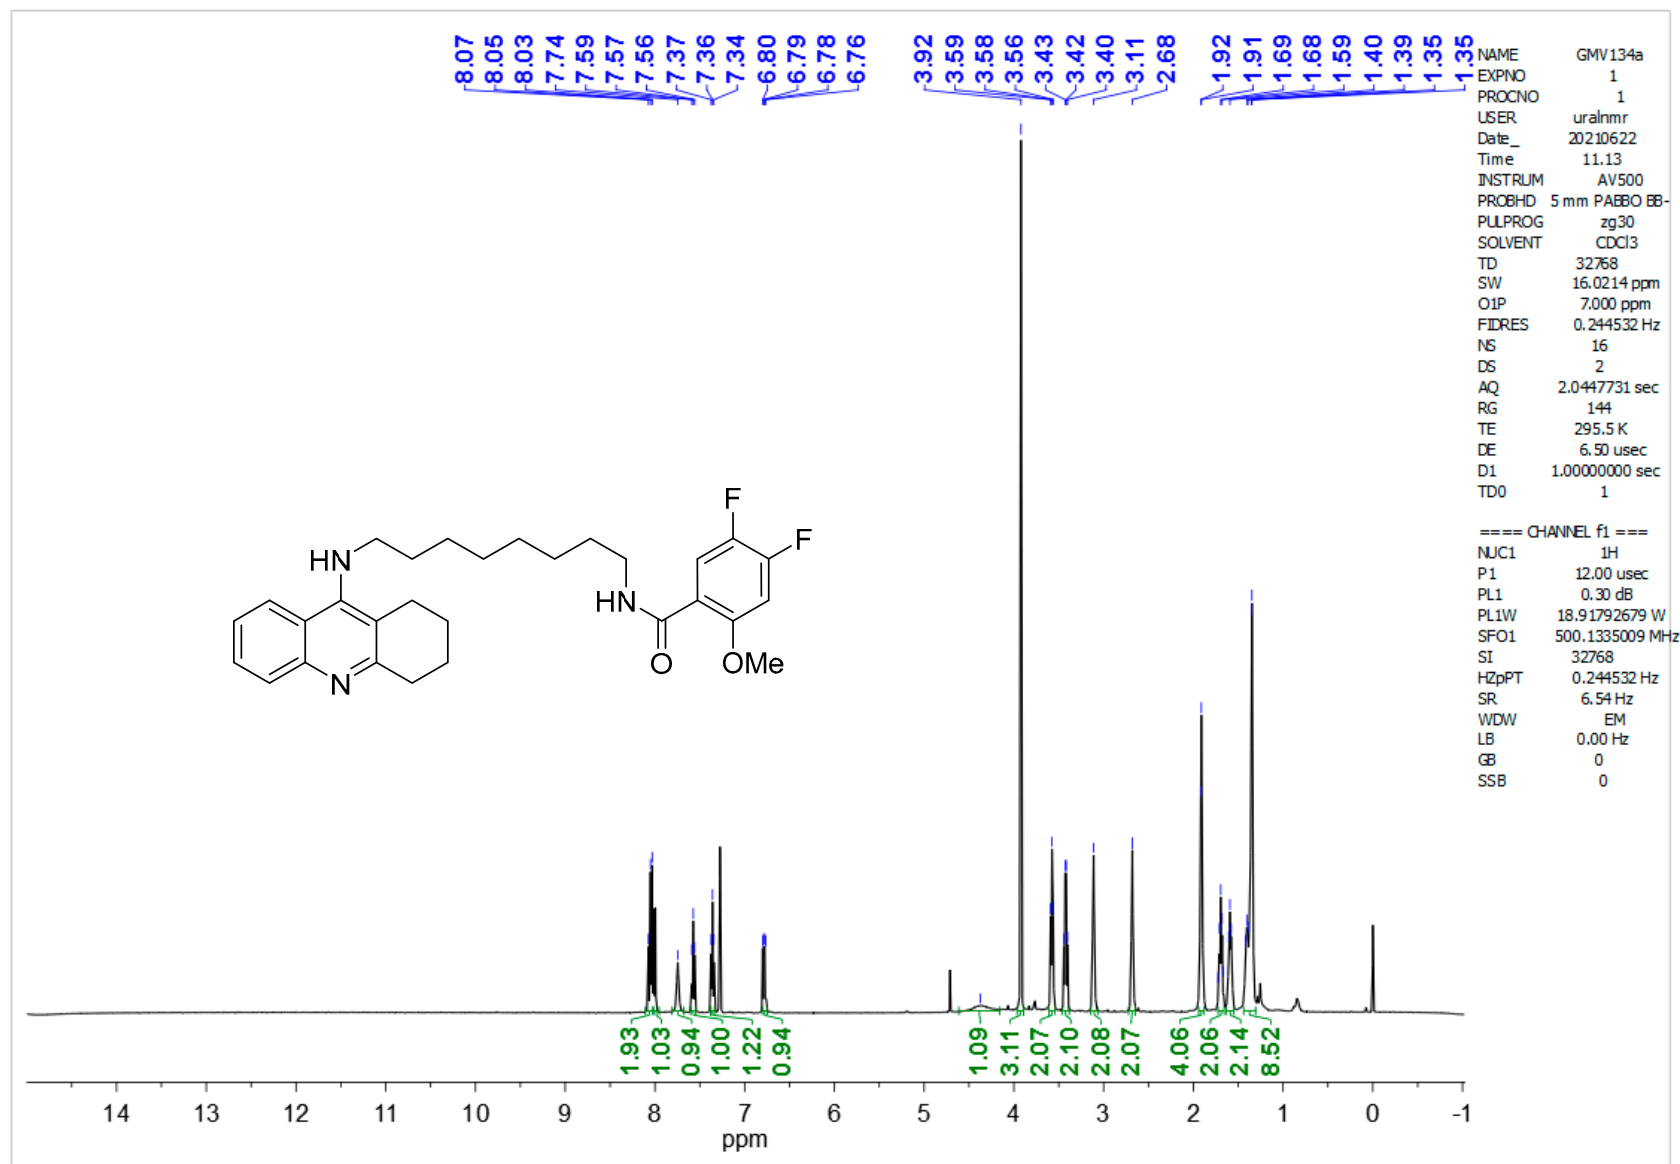

Figure S37. <sup>1</sup>H NMR spectrum of compound 8c

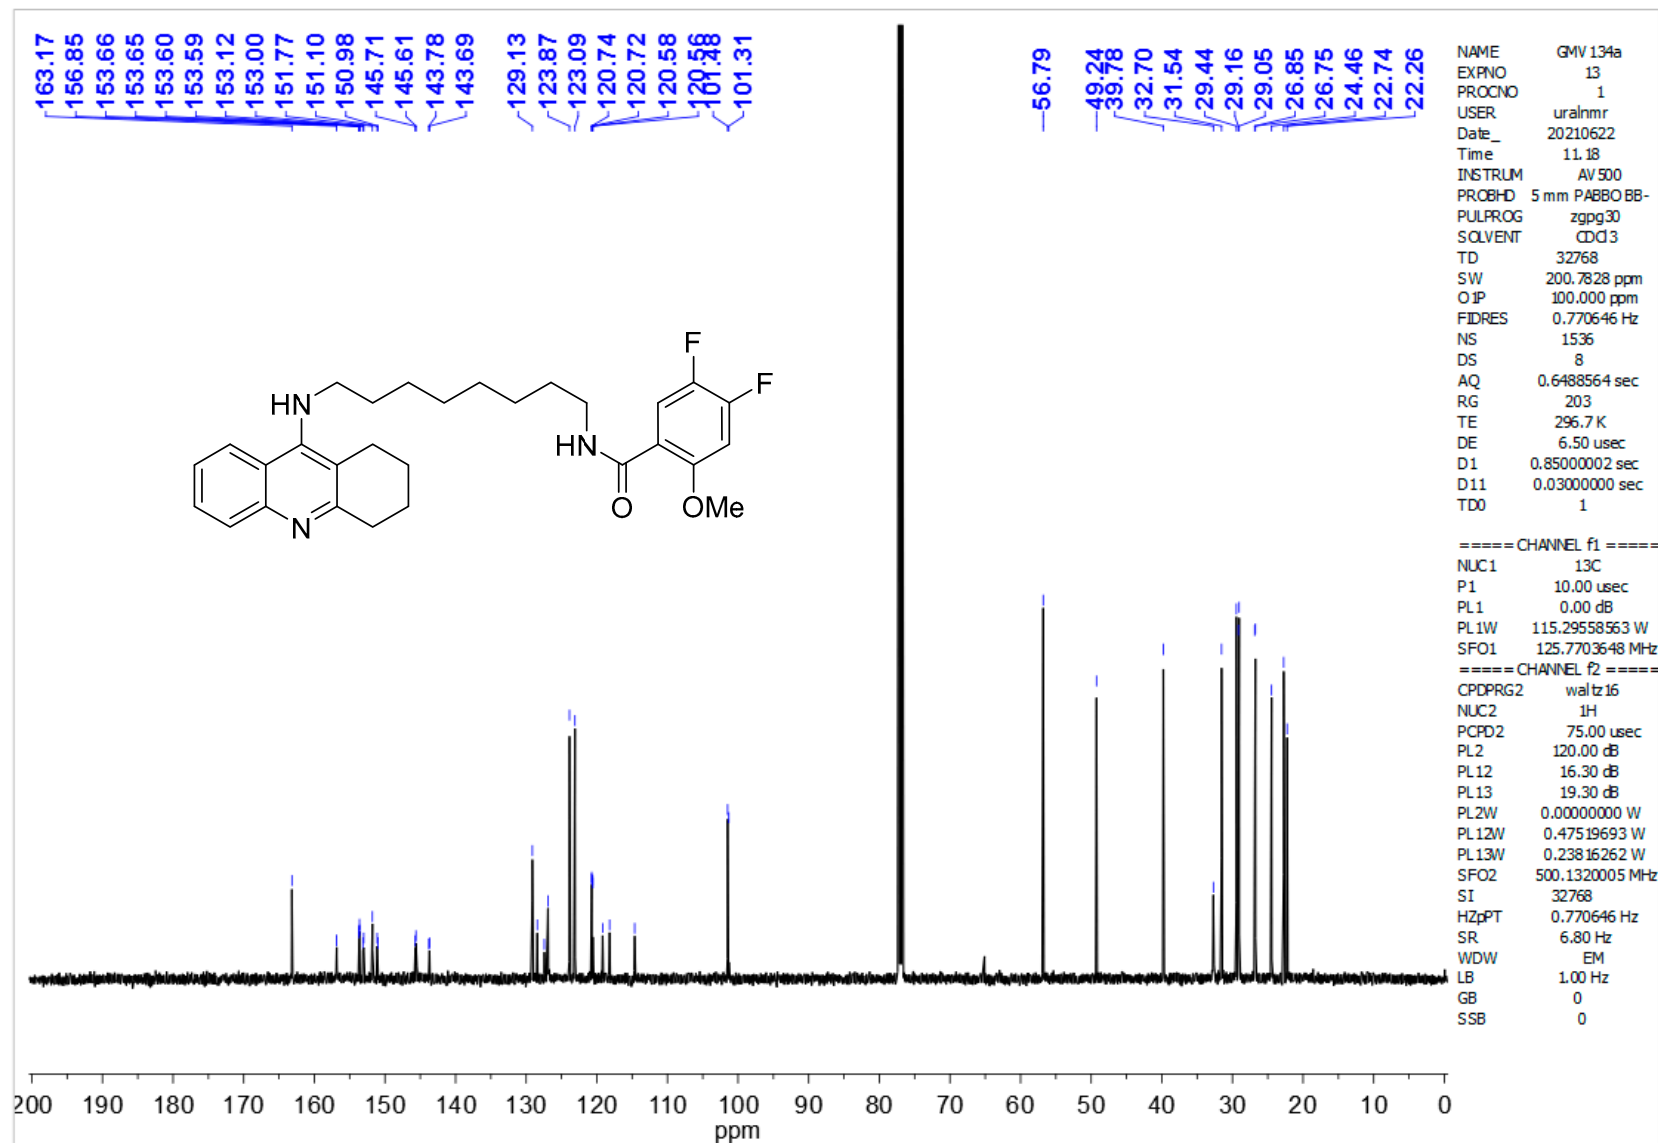

Figure S38. <sup>13</sup>C NMR spectrum of compound 8c

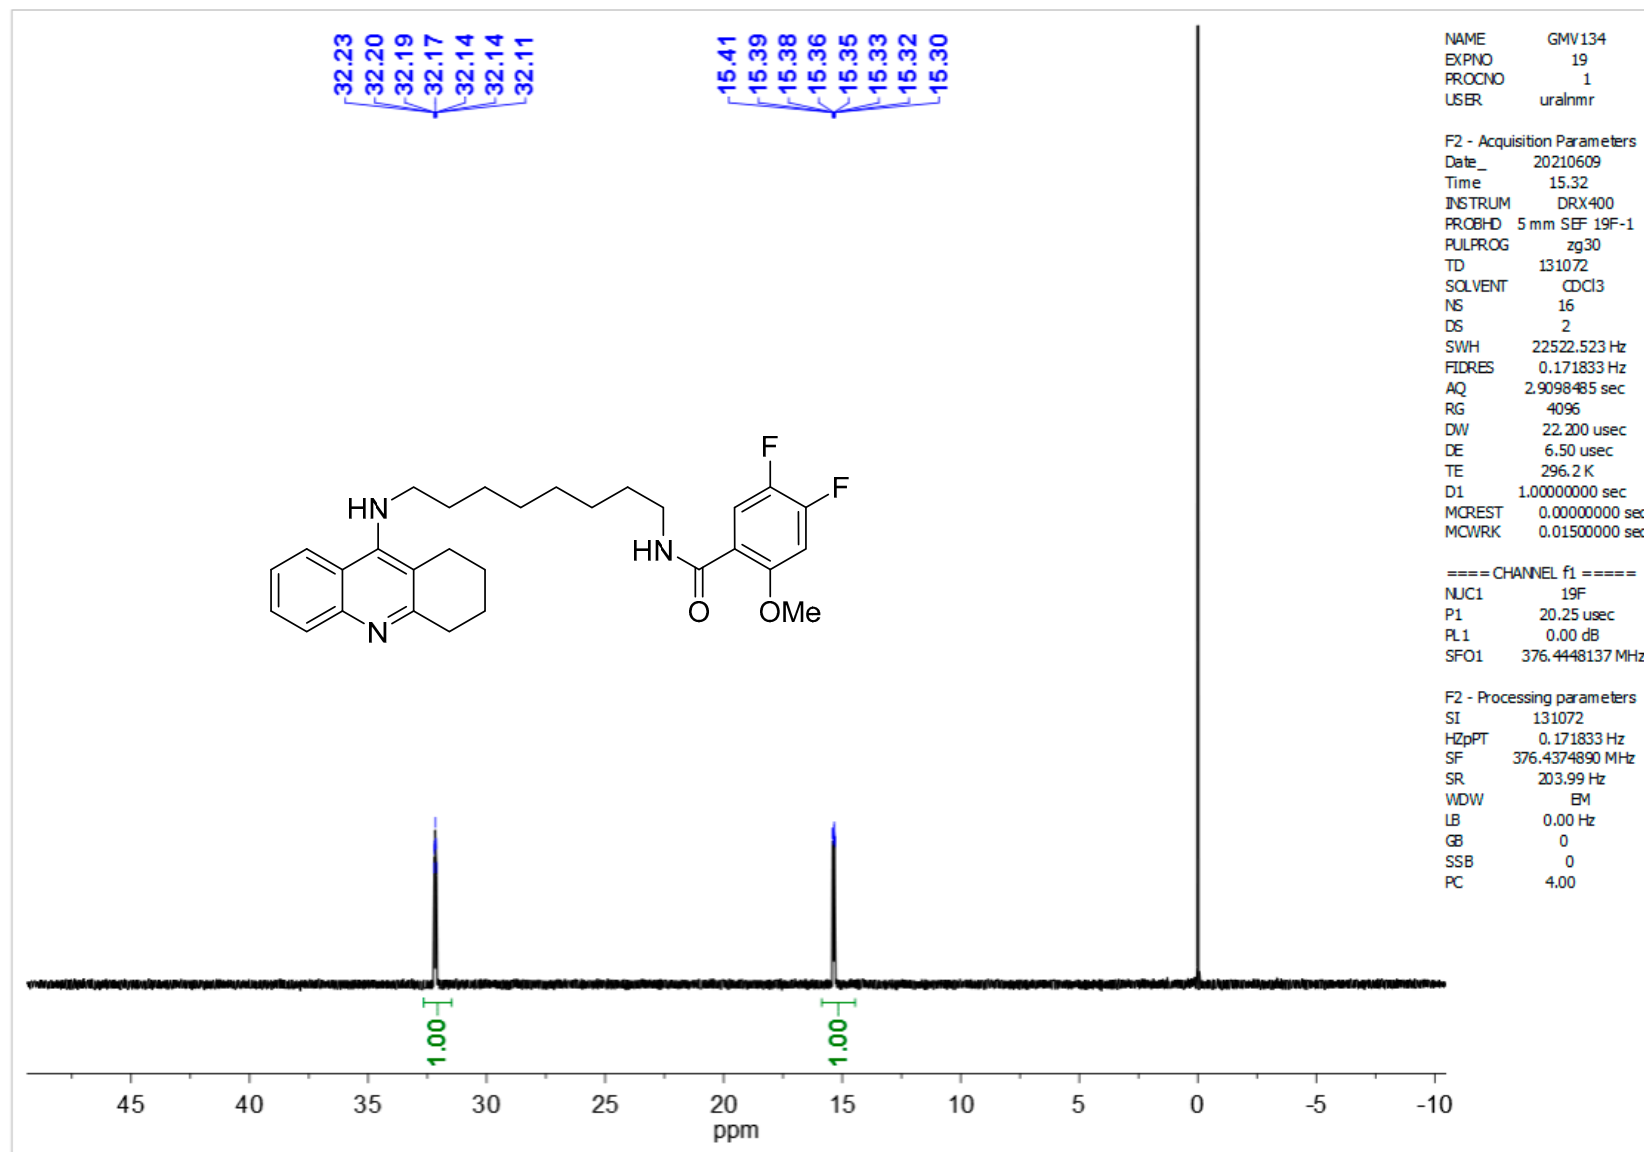

Figure S39. <sup>19</sup>F NMR spectrum of compound 8c



# Compound Spectrum SmartFormula Report

## Analysis Info

Analysis Name D:\Data\ING21\GMV-134.22i-C.EP180.6223\_23i1045.d  
 Method EP180UI21HPC50-1600\_500-3500-0.4-4-200\_1f2002f200hrf70ie5lm70ce10pps6crf300-1200tt40-110\_F3x1\_Segm1.m

Acquisition Date 9/23/2021 10:46:14 AM

Sample Name

Instrument maXis impact

Comment

2/09/2022: +Bckgnd: 118.09, 322.05, 622.03, 922.01, 1221.99, 1521.97, 1821.95, 2121.93, 2421.91, 2721.89 (G1969-85000; +/-299.981 HPC); other intense peaks (>2\*e4): 102.13 (NEt3); 132.91 (\*2-PrOH); 391.28&413.26 (DOP); 86.10, 113.13, 140.07, 149.02, 158.96, 167.03, 187.07, 194.10, 203.14, 207.17, 209.19, 214.25, 217.10, 223.21, 227.23, 237.22, 245.19, 249.22, 251.24, 255.27, 259.20, 263.23, 265.25, 273.22, 279.16, 291.27, 293.28, 304.30, 307.30, 321.31, 326.38, 332.33, 335.33, 349.35, 413.27, 1259.95, 1307.08, 1559.93: background (prev. analyzed samples and impurities); 188.09 (#6216); 588.32 (#6218); 404.23 (#6219); 376.20 (#6220); 440.21 (#6221)

## Acquisition Parameter

|             |          |                      |          |                  |           |
|-------------|----------|----------------------|----------|------------------|-----------|
| Source Type | ESI      | Ion Polarity         | Positive | Set Nebulizer    | 0.4 Bar   |
| Focus       | Active   | Set Capillary        | 3500 V   | Set Dry Heater   | 200 °C    |
| Scan Begin  | 50 m/z   | Set End Plate Offset | -500 V   | Set Dry Gas      | 4.0 l/min |
| Scan End    | 1600 m/z | Set Charging Voltage | 2000 V   | Set Divert Valve | Source    |
|             |          | Set Corona           | 0 nA     | Set APCI Heater  | 0 °C      |

1819696.00172

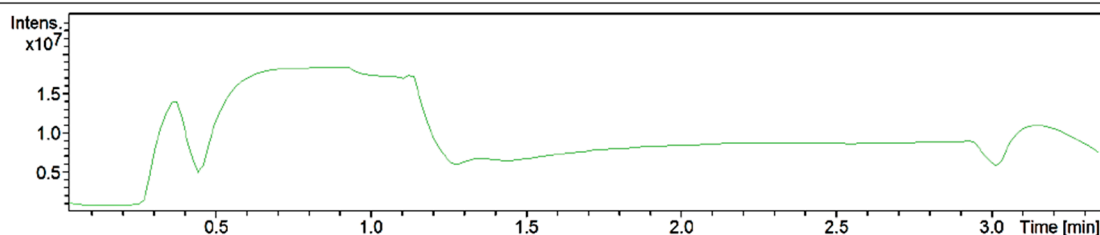

## +MS, 0.3-0.4min #18-22

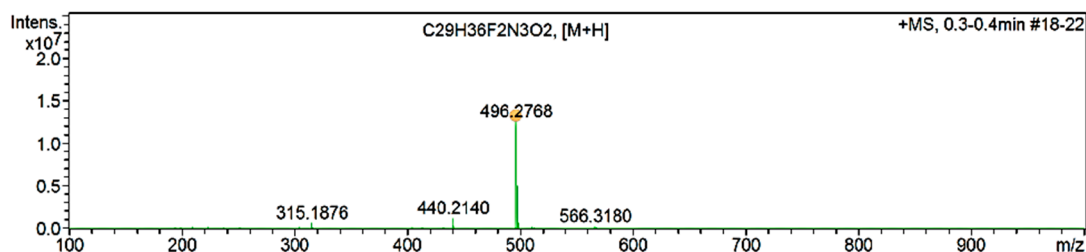

| Meas. m/z | # | Ion Formula  | m/z      | err [ppm] | mSigma | # mSigma | Score  | rdb  | e <sup>-</sup> Conf | N-Rule |
|-----------|---|--------------|----------|-----------|--------|----------|--------|------|---------------------|--------|
| 496.2768  | 1 | C32H35FN3O   | 496.2759 | -1.9      | 21.6   | 1        | 100.00 | 16.5 | even                | ok     |
|           | 2 | C29H36F2N3O2 | 496.2770 | 0.4       | 42.7   | 2        | 64.33  | 12.5 | even                | ok     |

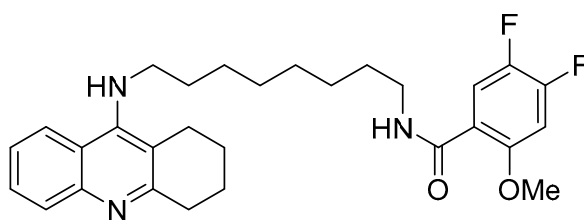

GMV-134.22i-C.EP180.6223\_23i1045.d

Bruker Compass DataAnalysis 4.2

printed: 9/23/2021 10:51:04 AM

Page 1 of 1

Figure S40. HRMS spectrum of compound 8c

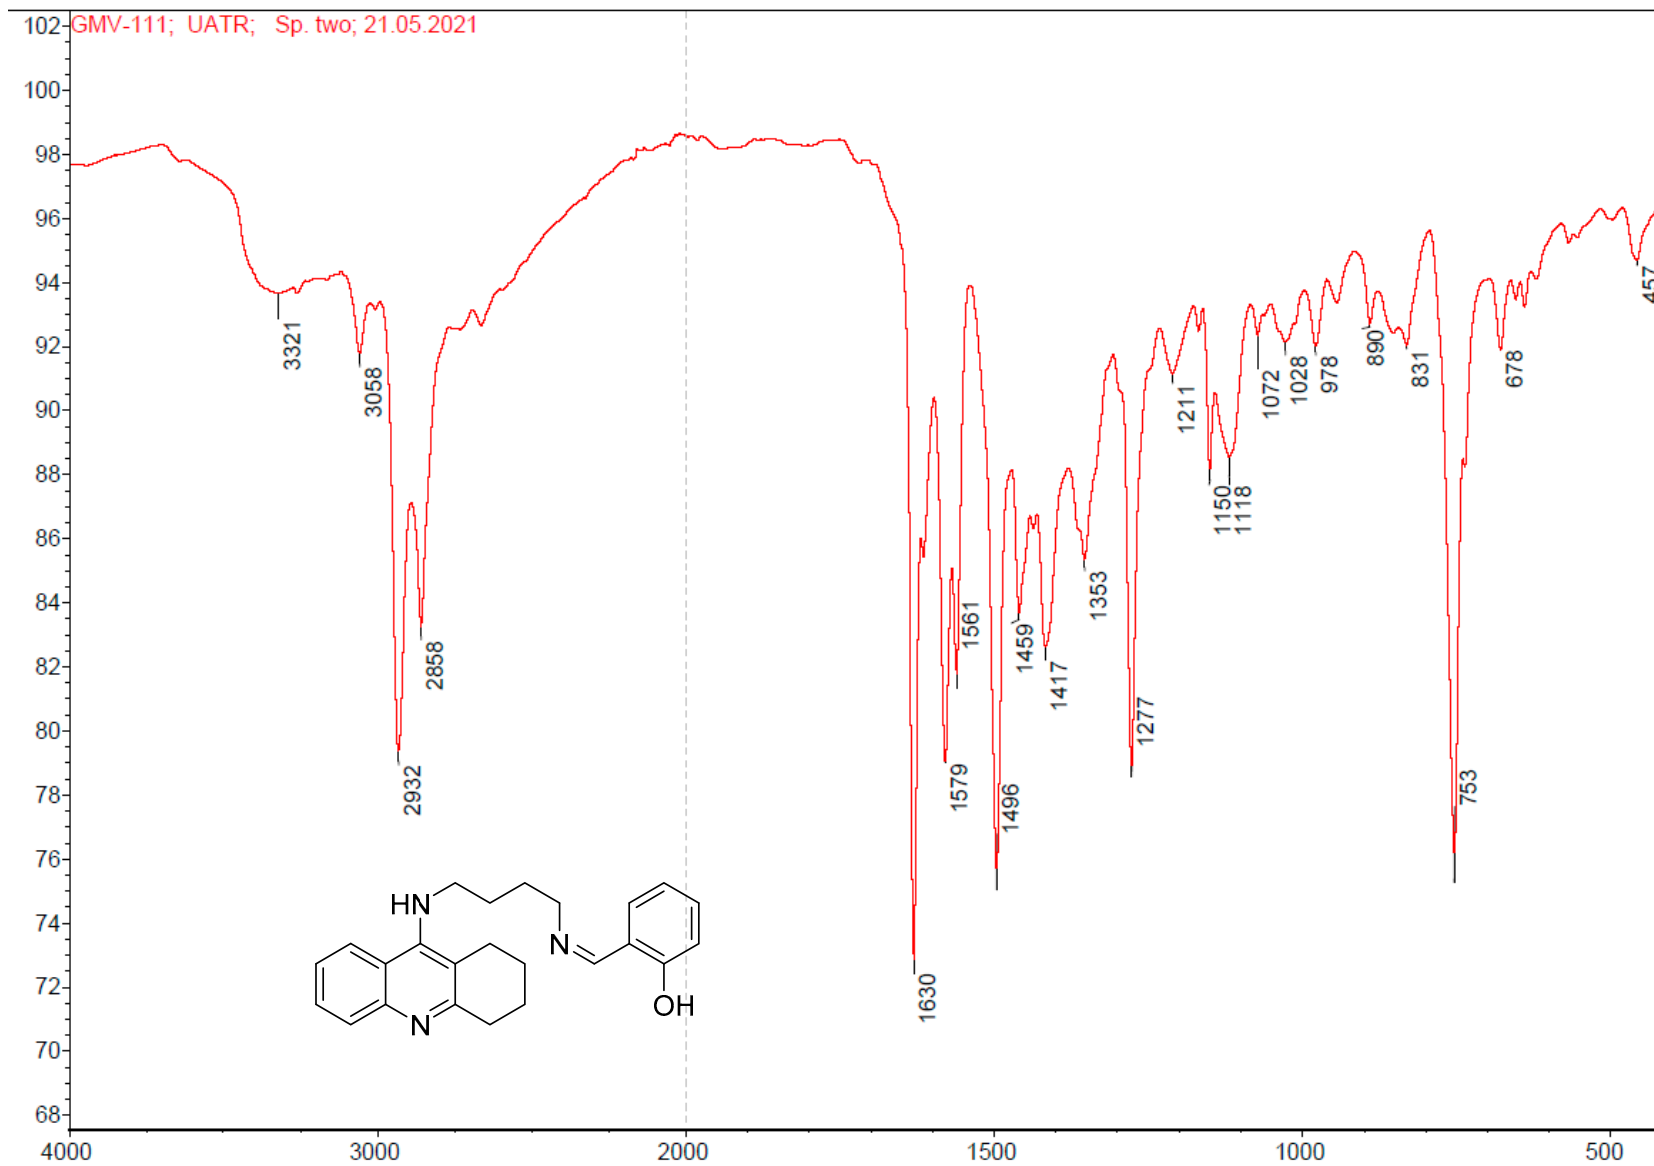

Figure S41. IR spectrum of compound 10a

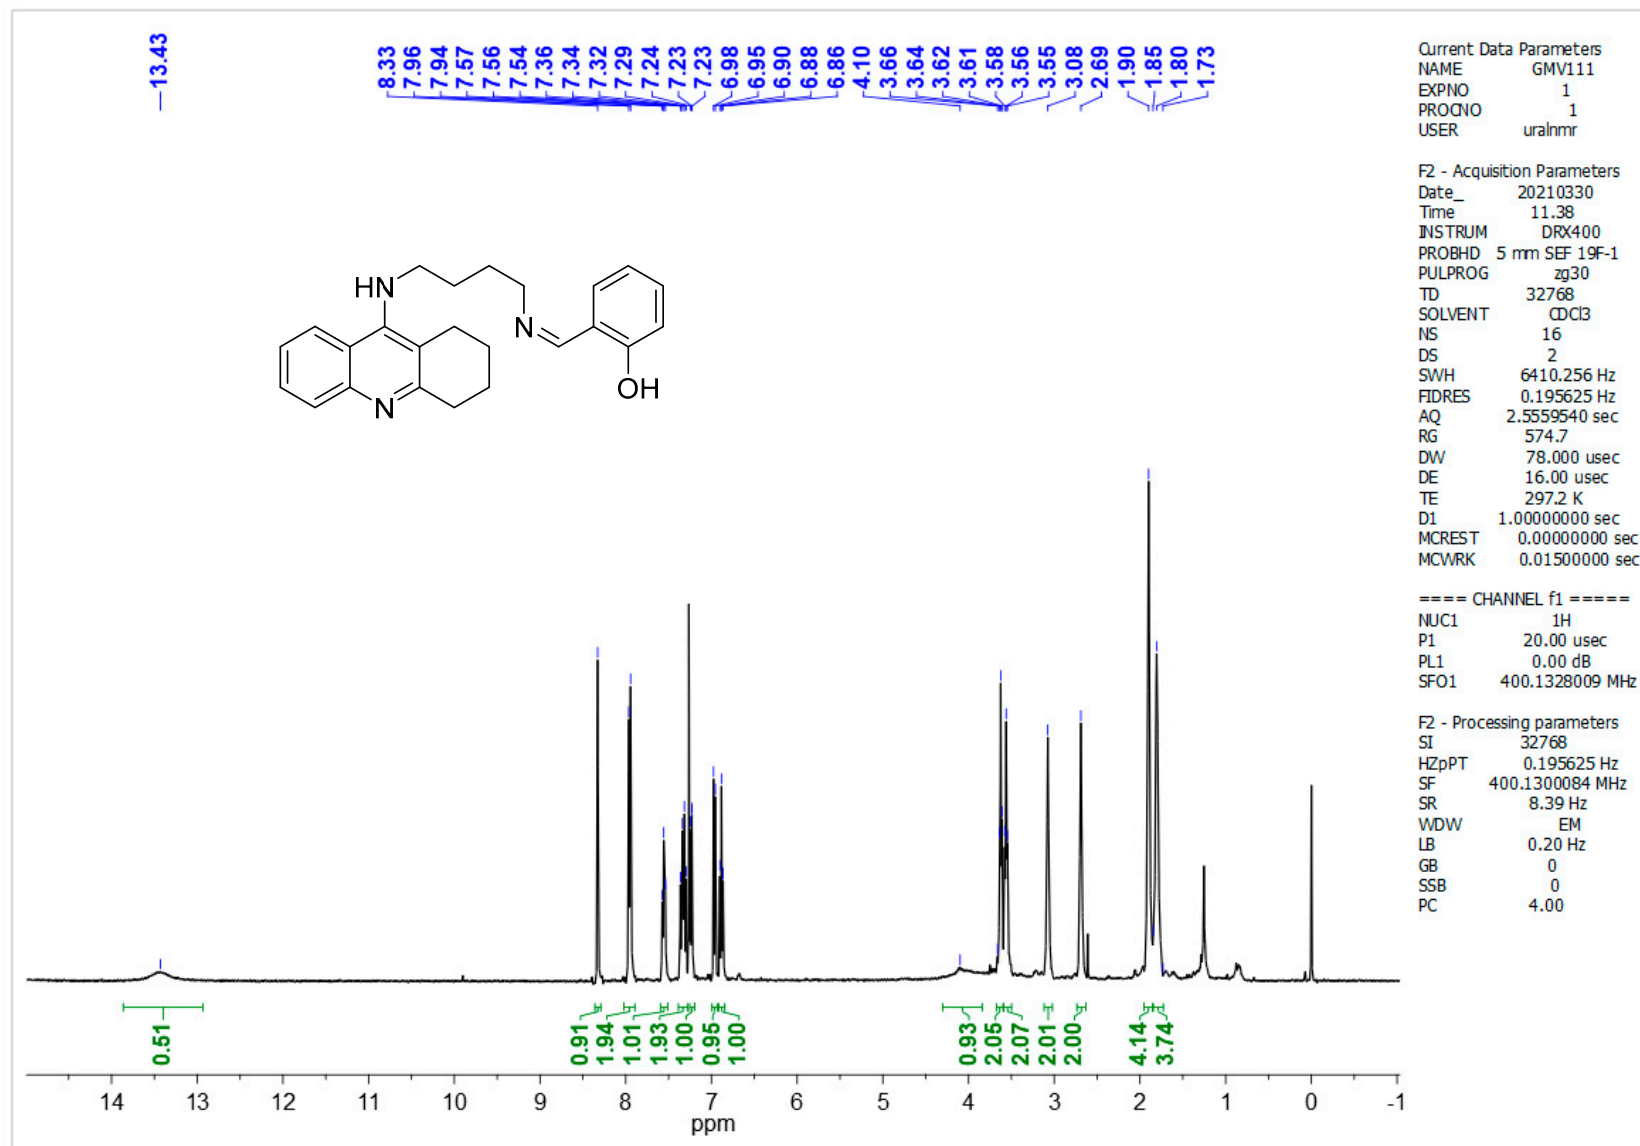

Figure S42. <sup>1</sup>H NMR spectrum of compound 10a

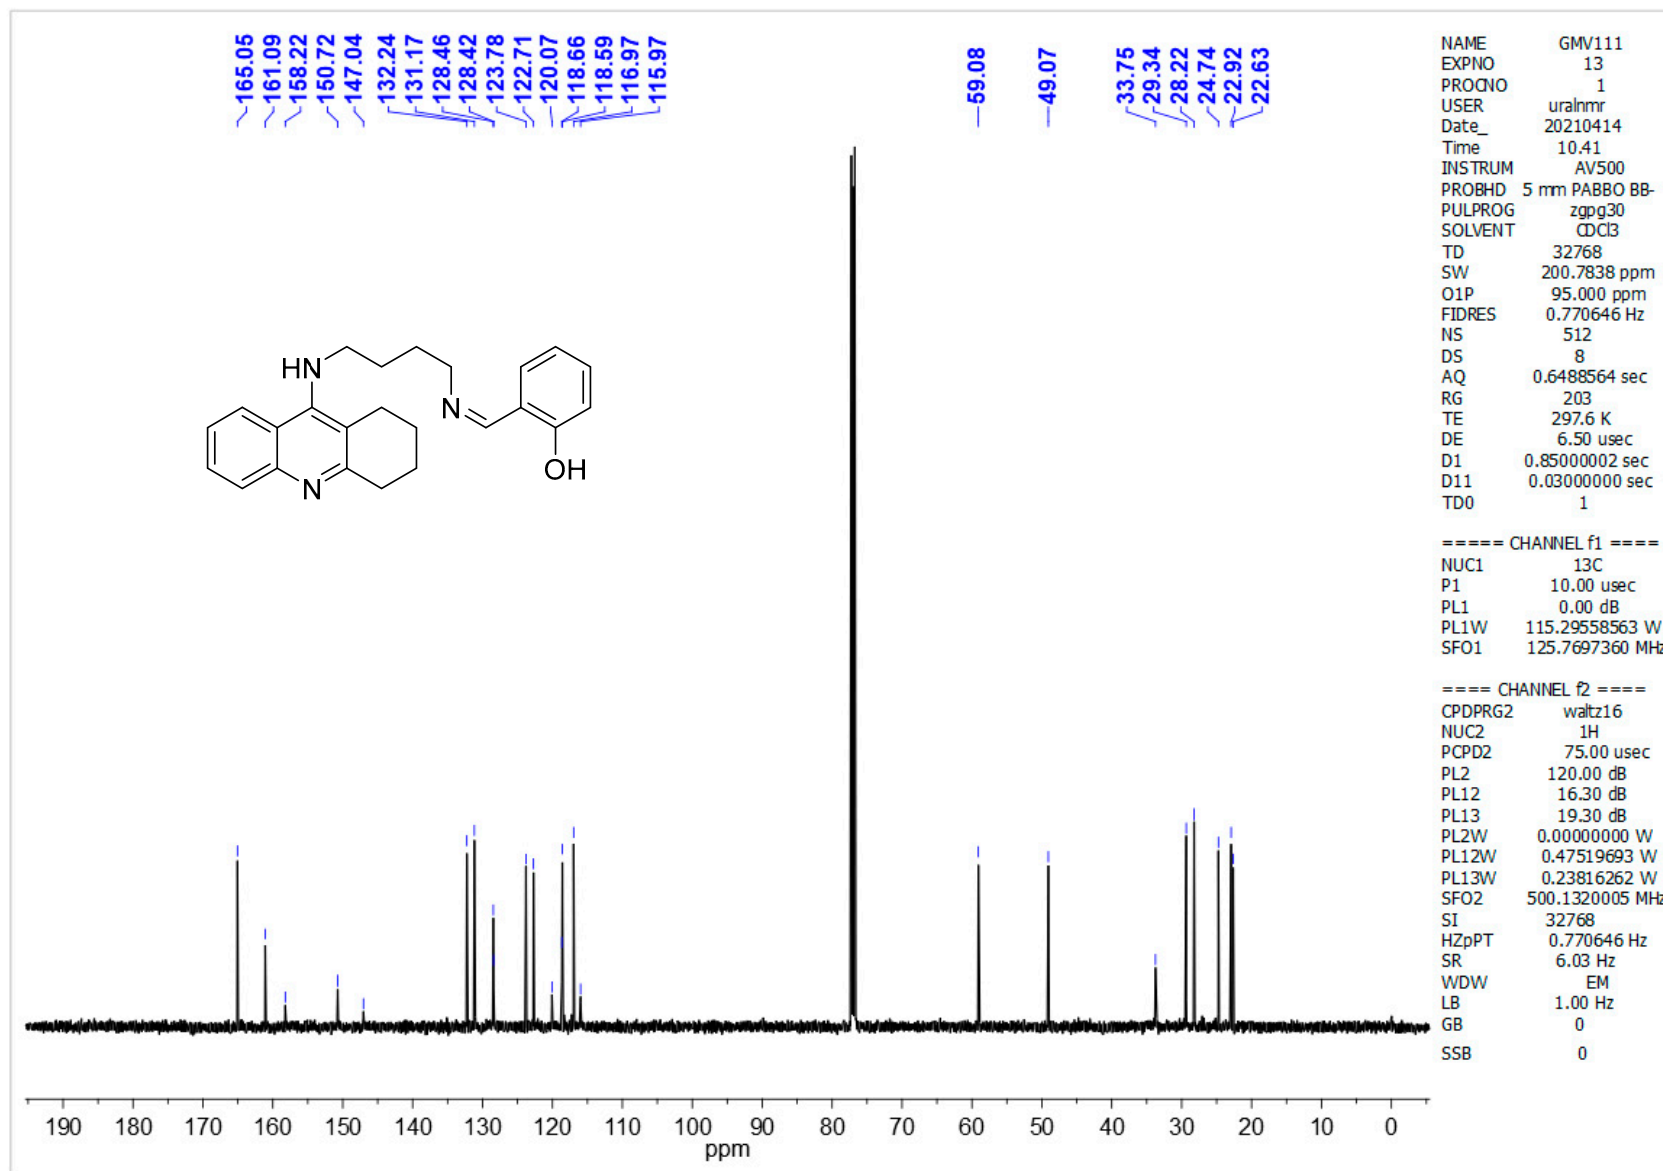

Figure S43.  $^{13}\text{C}$  NMR spectrum of compound 10a

# Compound Spectrum SmartFormula Report

## Analysis Info

Acquisition Date 4/26/2021 4:17:07 PM  
 Analysis Name D:\Data\ING21\GMV-111.22D-C1.6-ESIPOS-180.5875-26D1615.d  
 Method EP180\_50-2200\_TunePosStd-UA13\_1f3002f200hrf50ie3lm1 Operator admin  
 Sample Name 00ce3crf300-800tt60-120pps6x0.75\_fstnpc.m Instrument maXis impact 1819696.00172  
 Comment 26/04/2021: +Bckgnd: 118.09, 322.05, 622.03, 922.01, 1221.99, 1521.97, 1821.95, 2121.93, 2421.91, 2721.89 (G1969-85000; +/-299.981 HPC); other intense peaks (>2e4): 102.13 (NEt3); 132.91 (2-PrOH); 391.28 (DOP); 79.0, 86.10, 111.09, 157.03 (DMSO); 129.05, 132.91, 144.98, 140.02, 161.08, 165.13, 175.10, 183.17, 194.12, 199.12, 209.19, 214.25, 223.21, 227.24, 237.24, 249.22, 251.24, 251.24, 255.27, 277.25, 293.28, 299.19, 304.30, 307.30, 344.19, 407.10, 430.17, 707.12, 1007.10, 1307.08, 1557.95: background (prev. analyzed samples and impurities); 339.12 (#5451); 446.28 (#5721); 390.22 (#5874); 430.29 (#5876); 419.25 (#5878); 402.25 (#5876)

## Acquisition Parameter

|             |          |                      |          |                  |           |
|-------------|----------|----------------------|----------|------------------|-----------|
| Source Type | ESI      | Ion Polarity         | Positive | Set Nebulizer    | 0.3 Bar   |
| Focus       | Active   | Set Capillary        | 3500 V   | Set Dry Heater   | 200 °C    |
| Scan Begin  | 50 m/z   | Set End Plate Offset | -500 V   | Set Dry Gas      | 4.0 l/min |
| Scan End    | 2200 m/z | Set Charging Voltage | 2000 V   | Set Divert Valve | Source    |
|             |          | Set Corona           | 0 nA     | Set APCI Heater  | 0 °C      |

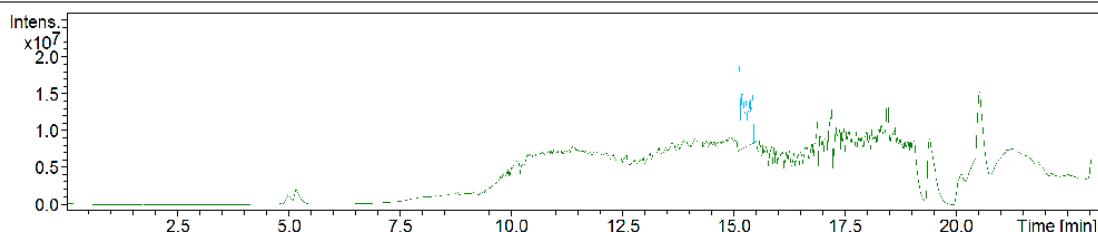

## +MS, 20.3-22.9min #886-996 (i.EQ; -322)

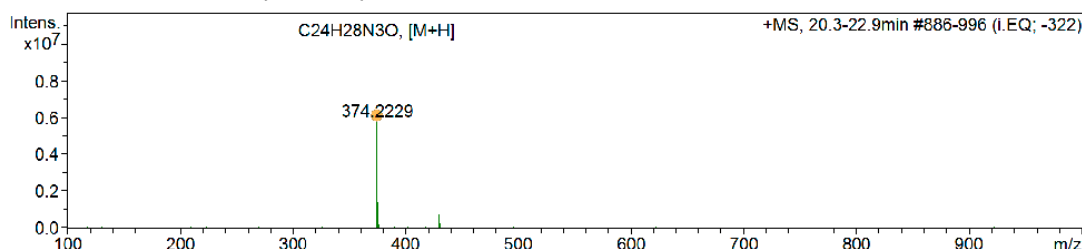

| Meas. m/z | # | Ion Formula | m/z      | err [ppm] | mSigma | # mSigma | Score  | rdb  | e <sup>-</sup> Conf | N-Rule |
|-----------|---|-------------|----------|-----------|--------|----------|--------|------|---------------------|--------|
| 374.2229  | 1 | C24H28N3O   | 374.2227 | -0.7      | 14.4   | 1        | 100.00 | 12.5 | even                | ok     |

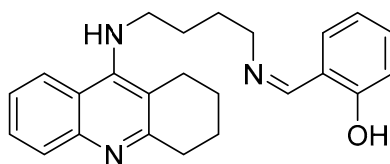

GMV-111.22D-C1.6-ESIPOS-180.5875-26D1615.d

Bruker Compass DataAnalysis 4.2

printed: 4/26/2021 4:45:50 PM

by: admin

Page 1 of 1

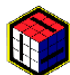

Institute of Organic Synthesis UB RAS  
 22 S.Kovalevskoy, 20 Akademicheskaya str, Yekaterinburg, Russian Federation  
 Phone: +7 (343) 362-34-56

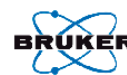

Figure S44. HRMS spectrum of compound 10a

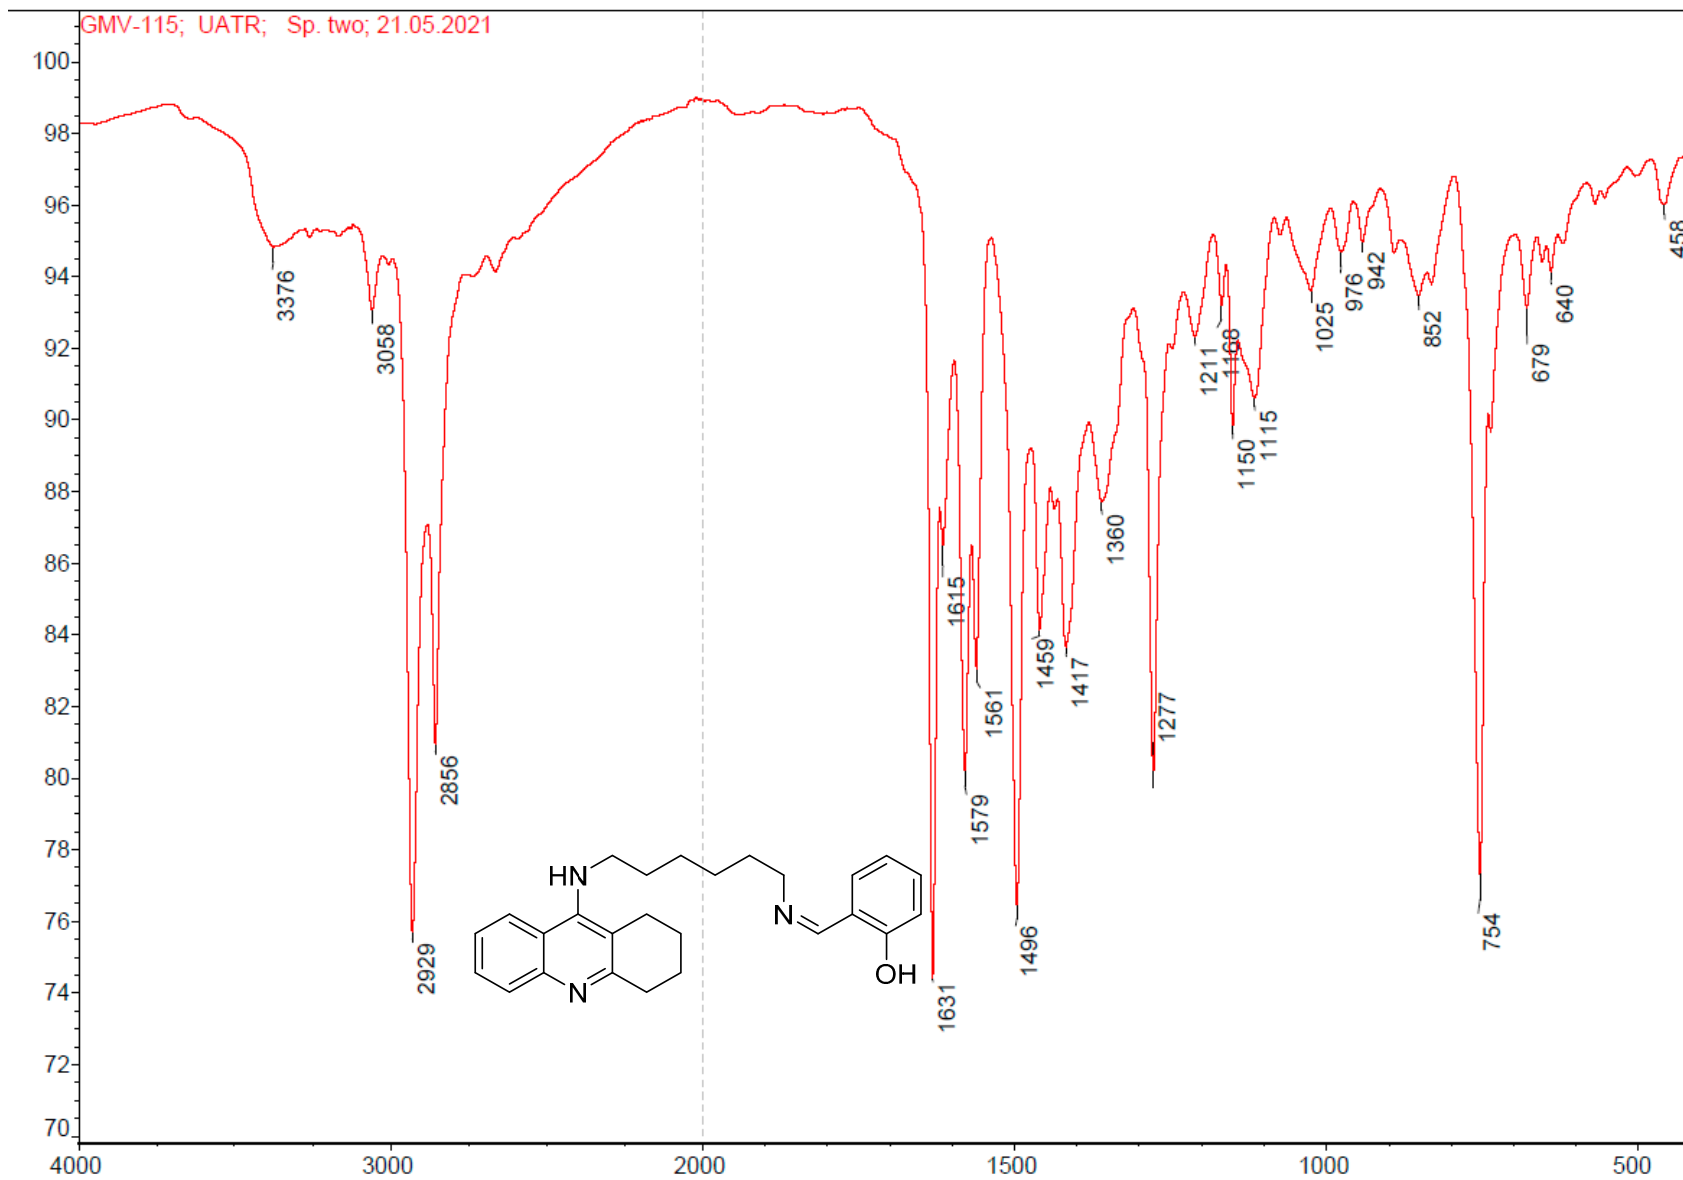

Figure S45. IR spectrum of compound 10b

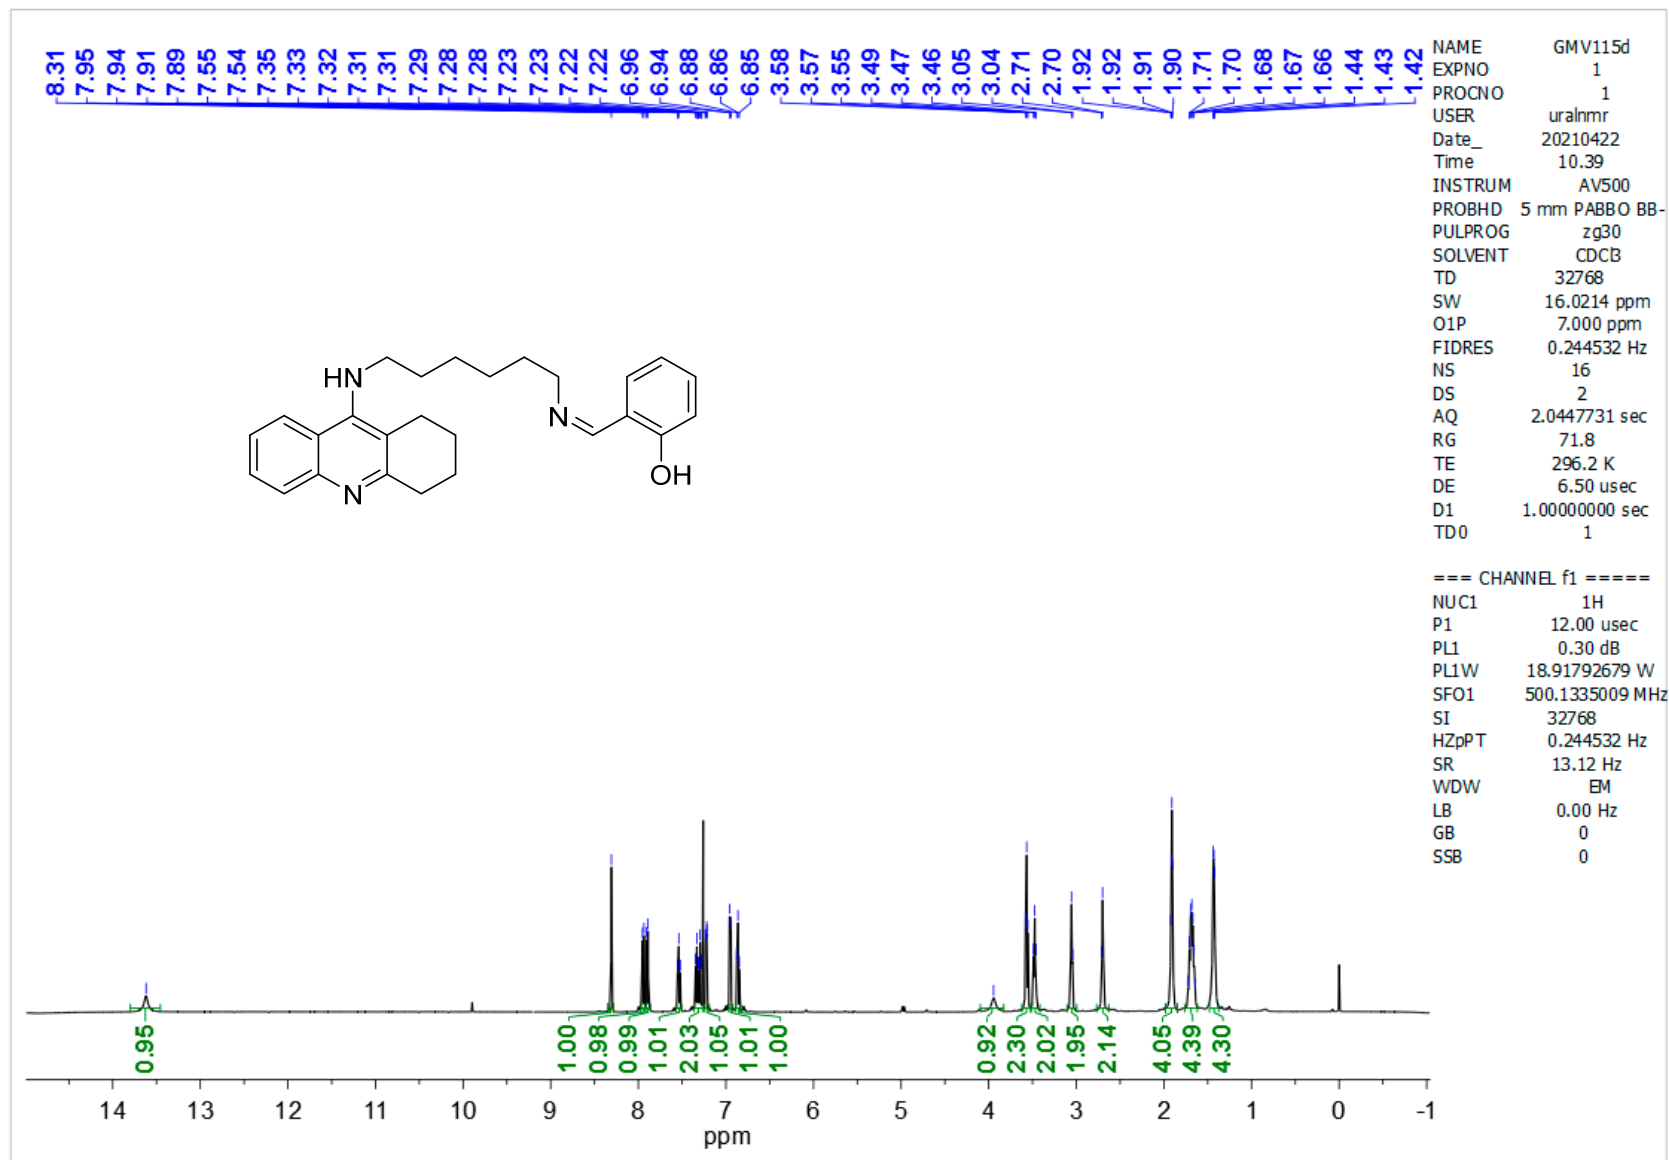

Figure S46. <sup>1</sup>H NMR spectrum of compound 10b

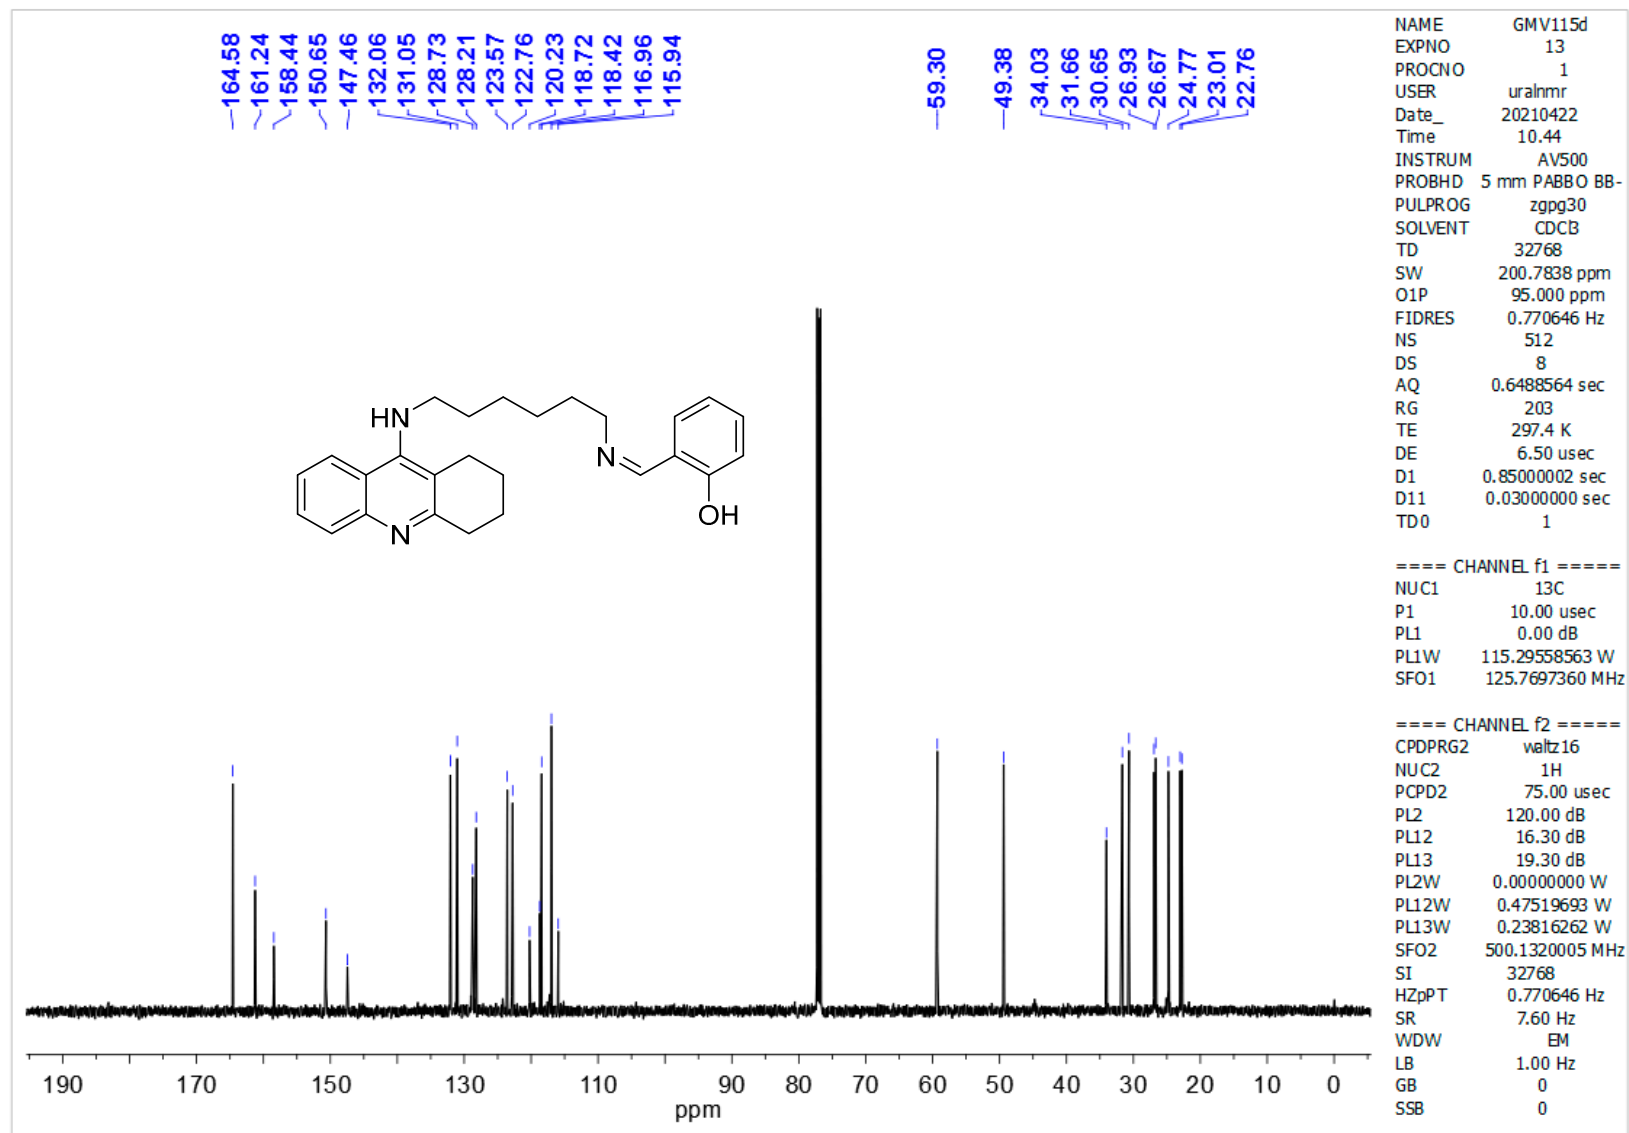

Figure S47. <sup>13</sup>C NMR spectrum of compound 10b



# Compound Spectrum SmartFormula Report

## Analysis Info

Analysis Name D:\Data\ING21\GMV-115.22D-C1.6-ESIPOS-180.5876-26D1540.d  
 Method EP180\_50-2200\_TunePosStd-UA13\_1f3002f200hrf50ie3lm1 Operator admin  
 Sample Name Instrument maXis impact 1819696.00172  
 Comment 26/04/2021: +Bckgnd: 118.09, 322.05, 622.03, 922.01, 1221.99, 1521.97, 1821.95, 2121.93, 2421.91, 2721.89 (G1969-85000; +/-299.981 HPC); other intense peaks (>2e4): 102.13 (NEt3); 132.91 (2-PrOH); 391.28 (DOP); 79.0, 86.10, 111.09, 157.03 (DMSO); 129.05, 132.91, 144.98, 140.02, 161.08, 165.13, 175.10, 183.17, 194.12, 199.12, 209.19, 214.25, 223.21, 227.24, 237.24, 249.22, 251.24, 251.24, 255.27, 277.25, 293.28, 299.19, 304.30, 307.30, 344.19, 407.10, 430.17, 707.12, 1007.10, 1307.08, 1557.95: background (prev. analyzed samples and impurities); 339.12 (#5451); 446.28 (#5721); 390.22 (#5874); 430.29 (#5876); 419.25 (#5878)

## Acquisition Parameter

|             |          |                      |          |                  |           |
|-------------|----------|----------------------|----------|------------------|-----------|
| Source Type | ESI      | Ion Polarity         | Positive | Set Nebulizer    | 0.3 Bar   |
| Focus       | Active   | Set Capillary        | 3500 V   | Set Dry Heater   | 200 °C    |
| Scan Begin  | 50 m/z   | Set End Plate Offset | -500 V   | Set Dry Gas      | 4.0 l/min |
| Scan End    | 2200 m/z | Set Charging Voltage | 2000 V   | Set Divert Valve | Source    |
|             |          | Set Corona           | 0 nA     | Set APCI Heater  | 0 °C      |

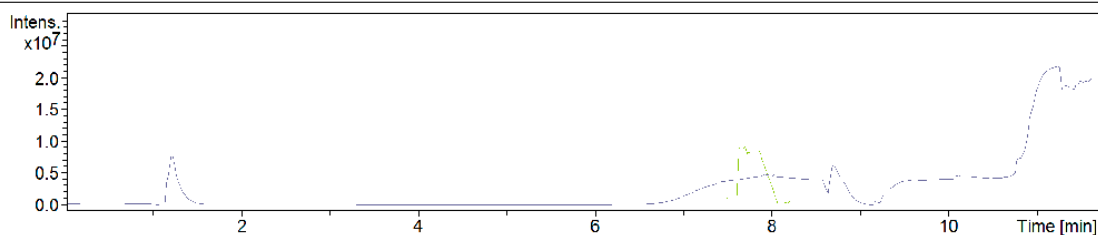

## +MS, 6.9-7.4min #302-324

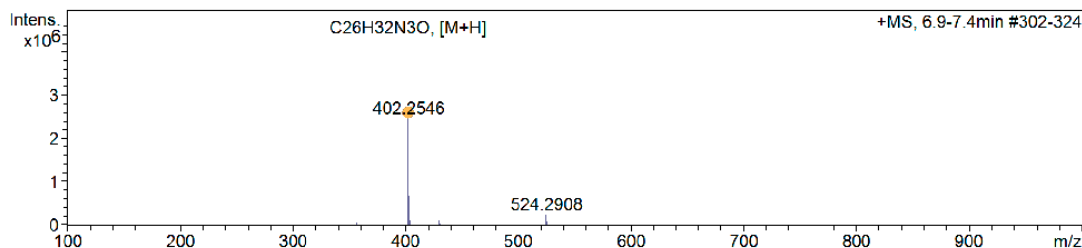

| Meas. m/z | # | Ion Formula | m/z      | err [ppm] | mSigma | # mSigma | Score  | rdb  | e <sup>-</sup> Conf | N-Rule |
|-----------|---|-------------|----------|-----------|--------|----------|--------|------|---------------------|--------|
| 402.2546  | 1 | C26H32N3O   | 402.2540 | -1.6      | 13.4   | 1        | 100.00 | 12.5 | even                | ok     |

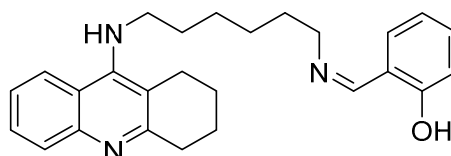

GMV-115.22D-C1.6-ESIPOS-180.5876-26D1540.d

Bruker Compass DataAnalysis 4.2

printed: 4/26/2021 3:54:16 PM

by: admin

Page 1 of 1

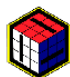

Institute of Organic Synthesis UB RAS  
 22 S.Kovalevskoy, 20 Akademicheskaya str, Yekaterinburg, Russian Federation  
 Phone: +7 (343) 362-34-56

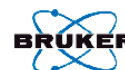

Figure S48. HMRS spectrum of compound 10b

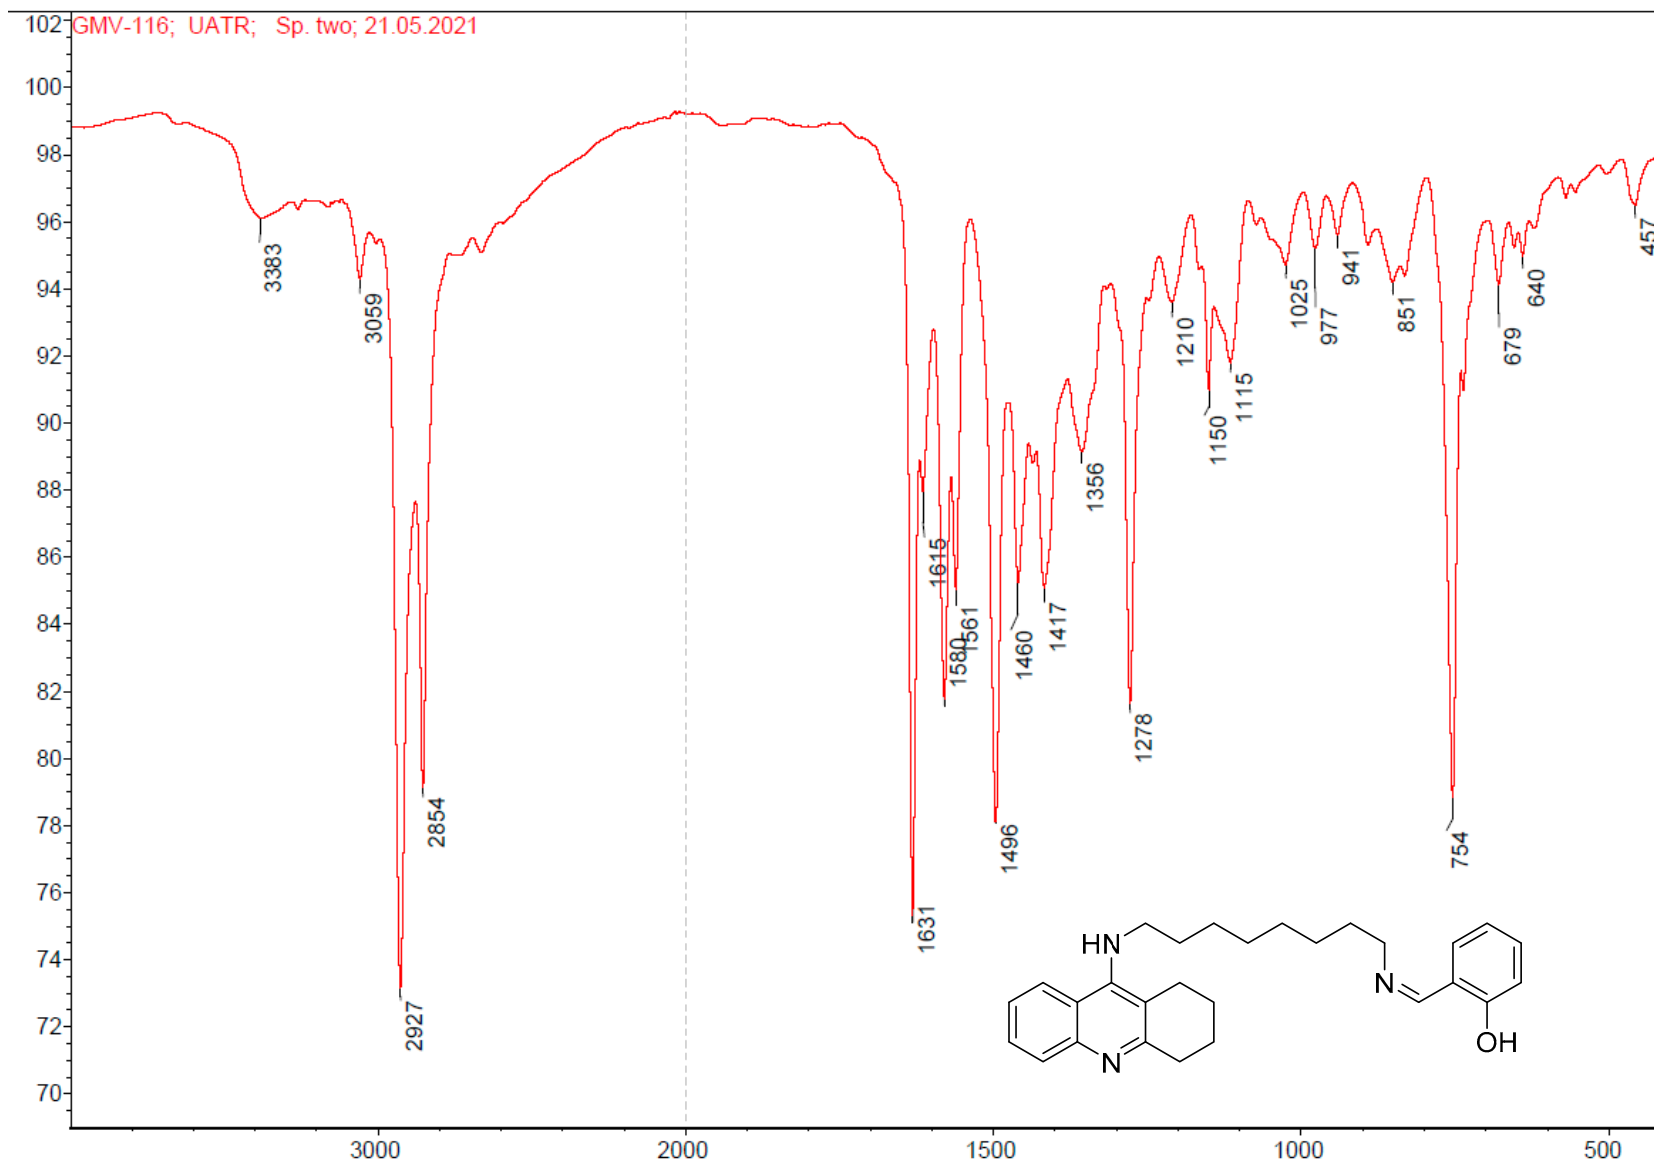

Figure S49. IR spectrum of compound 10c

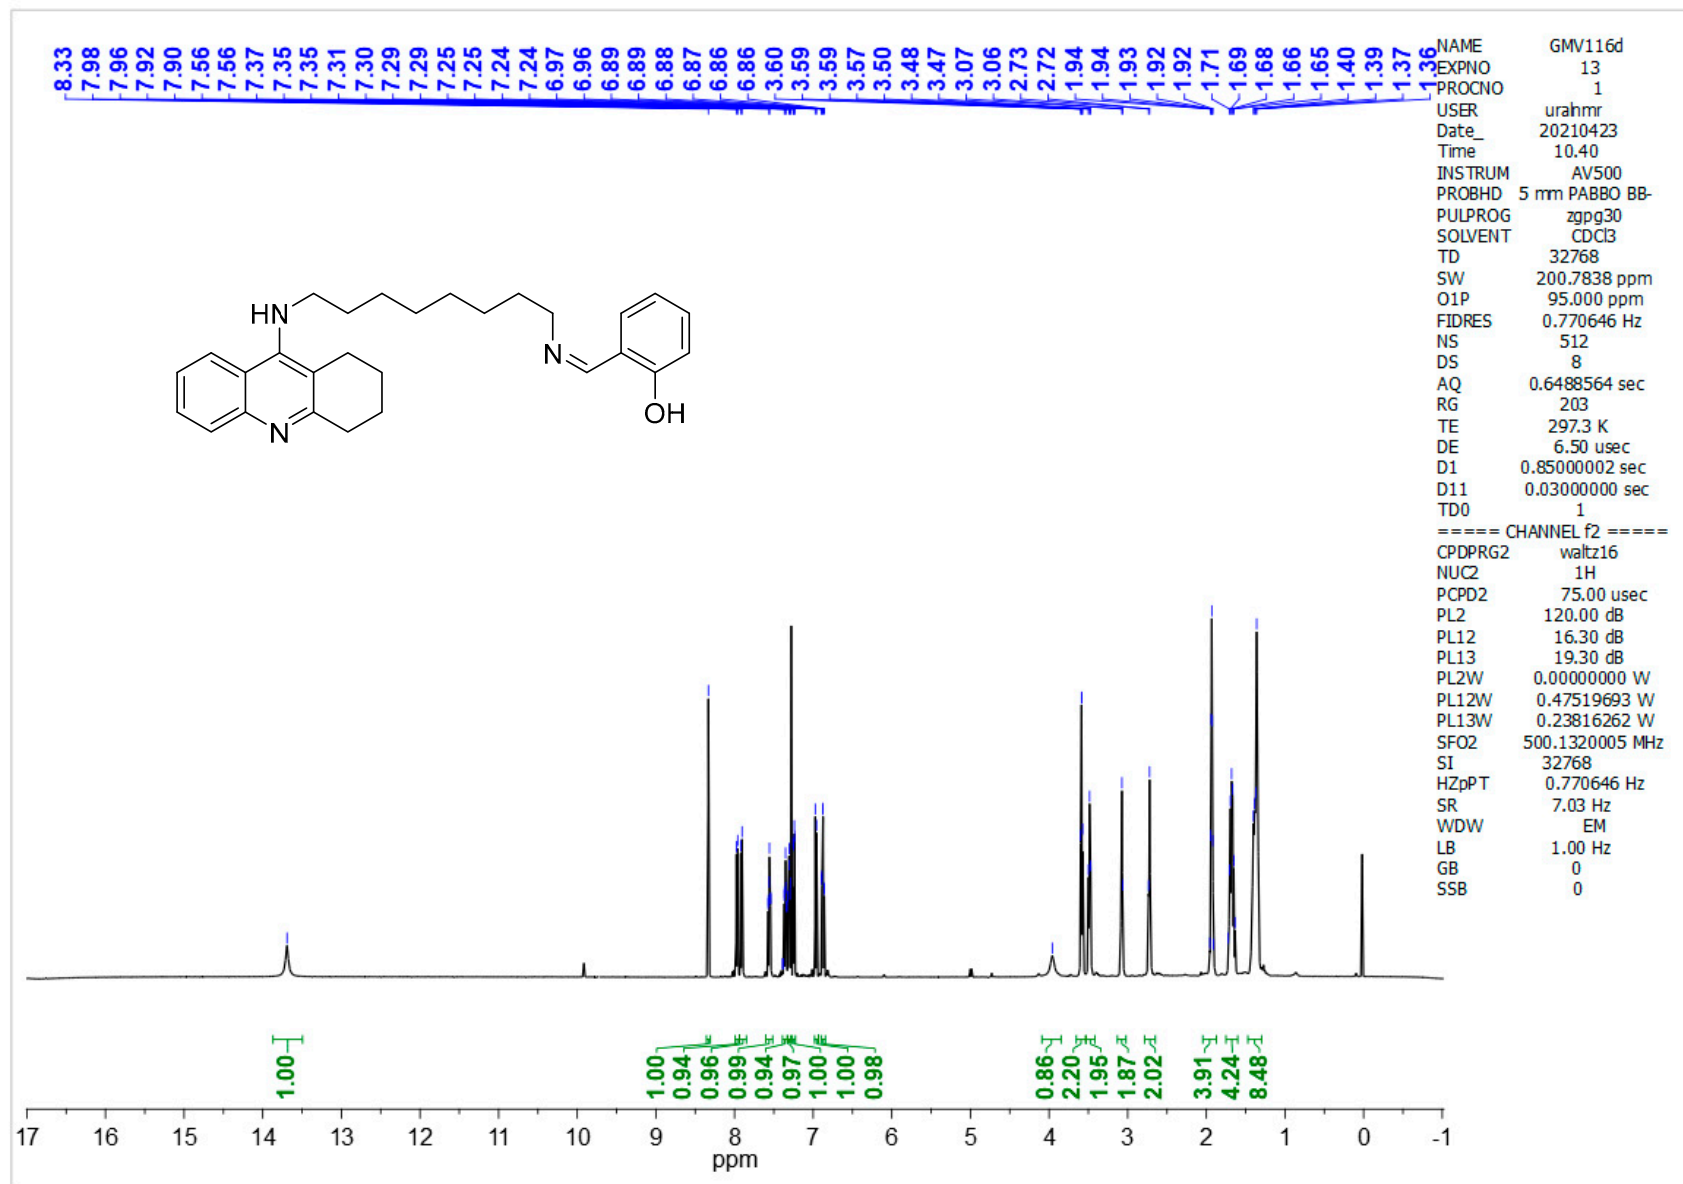

Figure S50. <sup>1</sup>H NMR spectrum of compound 10c

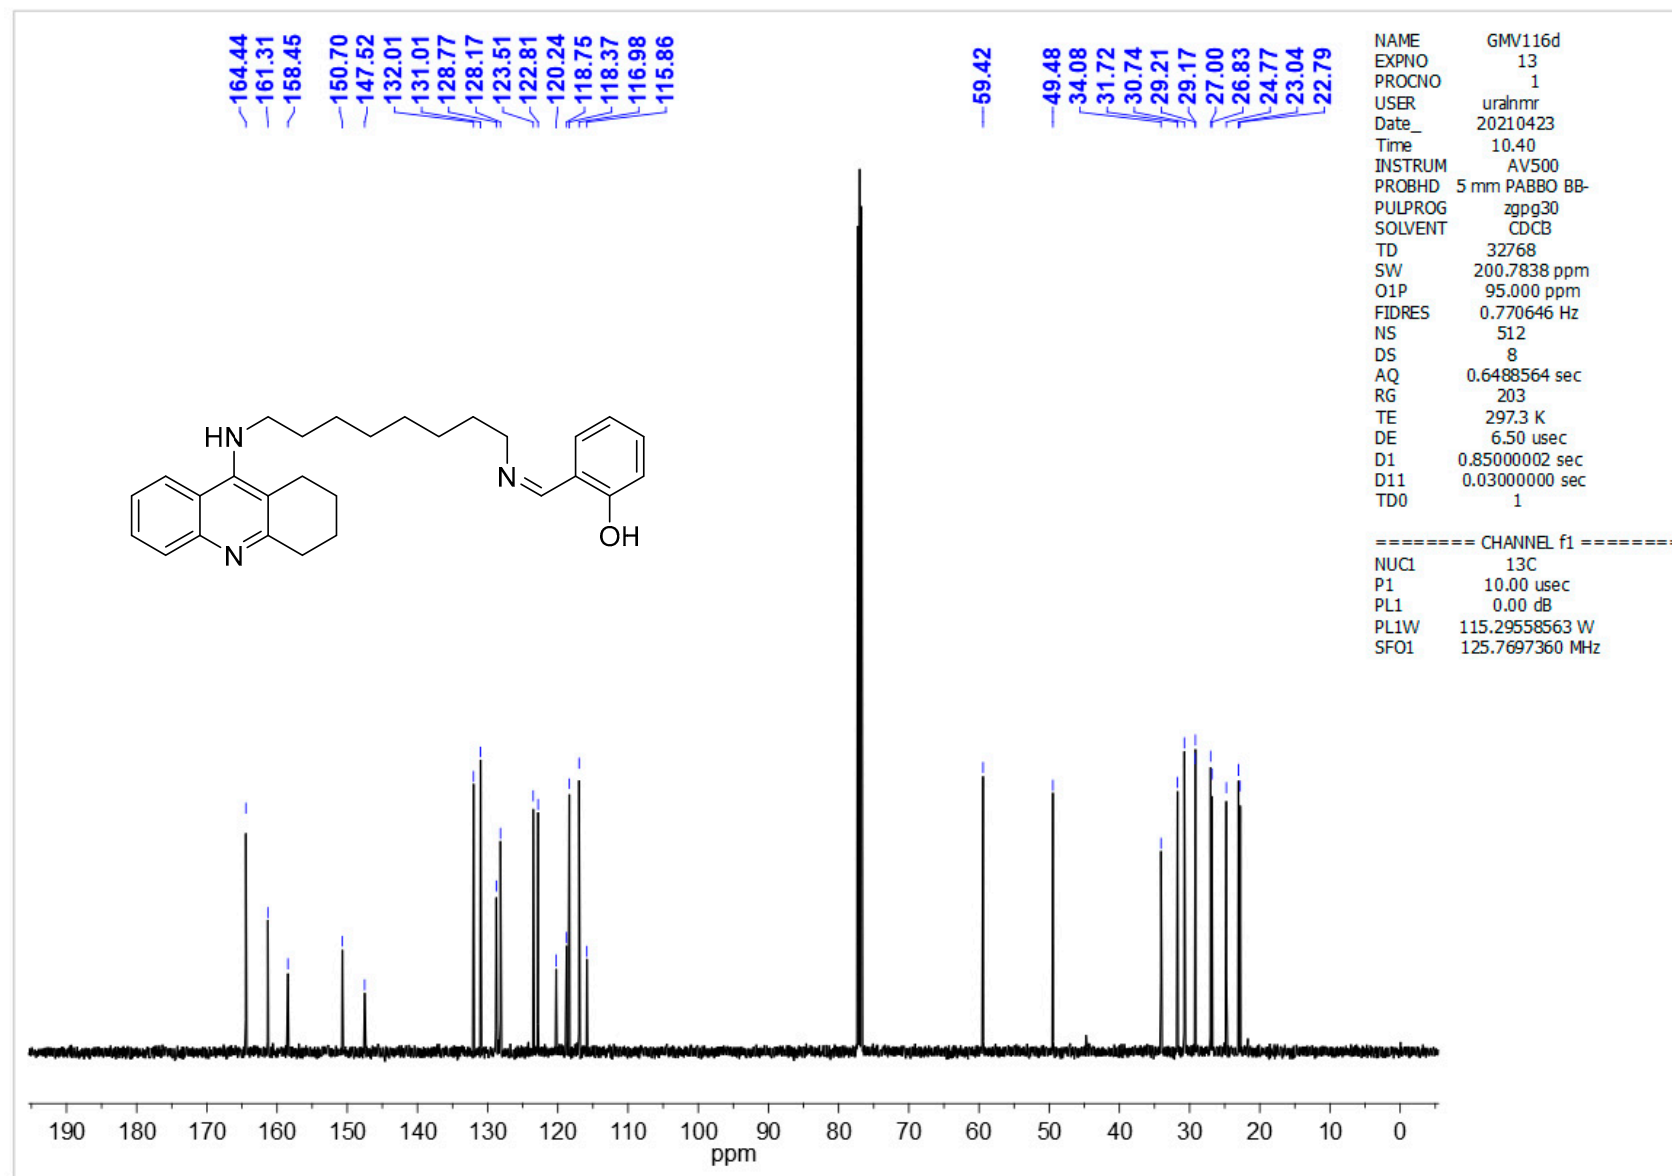

Figure S51. <sup>13</sup>C NMR spectrum of compound 10c

# Compound Spectrum SmartFormula Report

## Analysis Info

Acquisition Date 4/26/2021 2:59:56 PM  
 Analysis Name D:\Data\ING21\GMV-116.22D-C1.6-ESIPOS-180.5877-26D1500.d  
 Method EP180\_50-2200\_TunePosStd-UA13\_1f3002f200hfr50ie3lm1 Operator admin  
 Sample Name 00ce3crf300-800tt60-120pps6x0.75\_fsthpc.m Instrument maXis impact 1819696.00172  
 Comment 26/04/2021: +Bckgnd: 118.09, 322.05, 622.03, 922.01, 1221.99, 1521.97, 1821.95, 2121.93, 2421.91, 2721.89 (G1969-85000; +/-299.981 HPC); other intense peaks (>2e4): 102.13 (NEt3); 132.91 (2-PrOH); 391.28 (DOP); 79.0, 86.10, 111.09, 157.03 (DMSO); 129.05, 132.91, 144.98, 140.02, 161.08, 165.13, 175.10, 183.17, 194.12, 199.12, 209.19, 214.25, 223.21, 227.24, 237.24, 249.22, 251.24, 251.24, 255.27, 277.25, 293.28, 299.19, 304.30, 307.30, 344.19, 407.10, 430.17, 707.12, 1007.10, 1307.08, 1557.95: background (prev. analyzed samples and impurities); 339.12 (#5451); 446.28 (#5721); 309.02/311.02 (#5899); 155.08 (#5898); 231.11 (#5901); 321.14 (#5990); 367.19 (#5873); 390.22 (#5874)

## Acquisition Parameter

|             |          |                      |          |                  |           |
|-------------|----------|----------------------|----------|------------------|-----------|
| Source Type | ESI      | Ion Polarity         | Positive | Set Nebulizer    | 0.3 Bar   |
| Focus       | Active   | Set Capillary        | 3500 V   | Set Dry Heater   | 200 °C    |
| Scan Begin  | 50 m/z   | Set End Plate Offset | -500 V   | Set Dry Gas      | 4.0 l/min |
| Scan End    | 2200 m/z | Set Charging Voltage | 2000 V   | Set Divert Valve | Source    |
|             |          | Set Corona           | 0 nA     | Set APCI Heater  | 0 °C      |

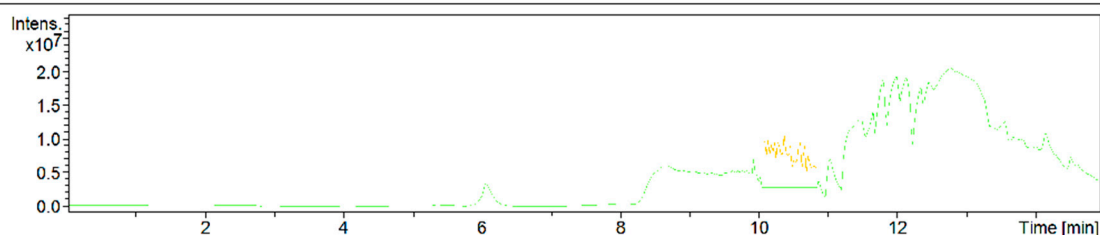

## +MS, 13.6-14.9min #592-648

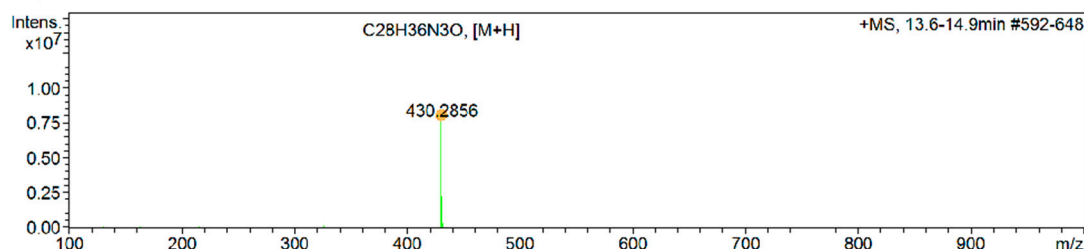

| Meas. m/z | # | Ion Formula | m/z      | err [ppm] | mSigma | # mSigma | Score  | rdb  | e <sup>-</sup> Conf | N-Rule |
|-----------|---|-------------|----------|-----------|--------|----------|--------|------|---------------------|--------|
| 430.2856  | 1 | C28H36N3O   | 430.2853 | -0.8      | 14.3   | 1        | 100.00 | 12.5 | even                | ok     |

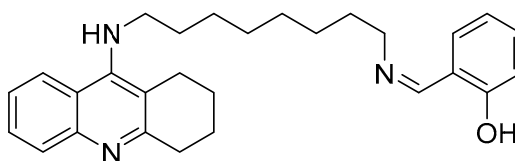

GMV-116.22D-C1.6-ESIPOS-180.5877-26D1500.d

Bruker Compass DataAnalysis 4.2

printed: 4/26/2021 3:15:50 PM

by: admin

Page 1 of 1

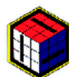

Institute of Organic Synthesis UB RAS  
 22 S.Kovalevskoy, 20 Akademicheskaya str, Yekaterinburg, Russian Federation  
 Phone: +7 (343) 362-34-56

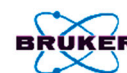

Figure S52. HRMS spectrum of compound 10c

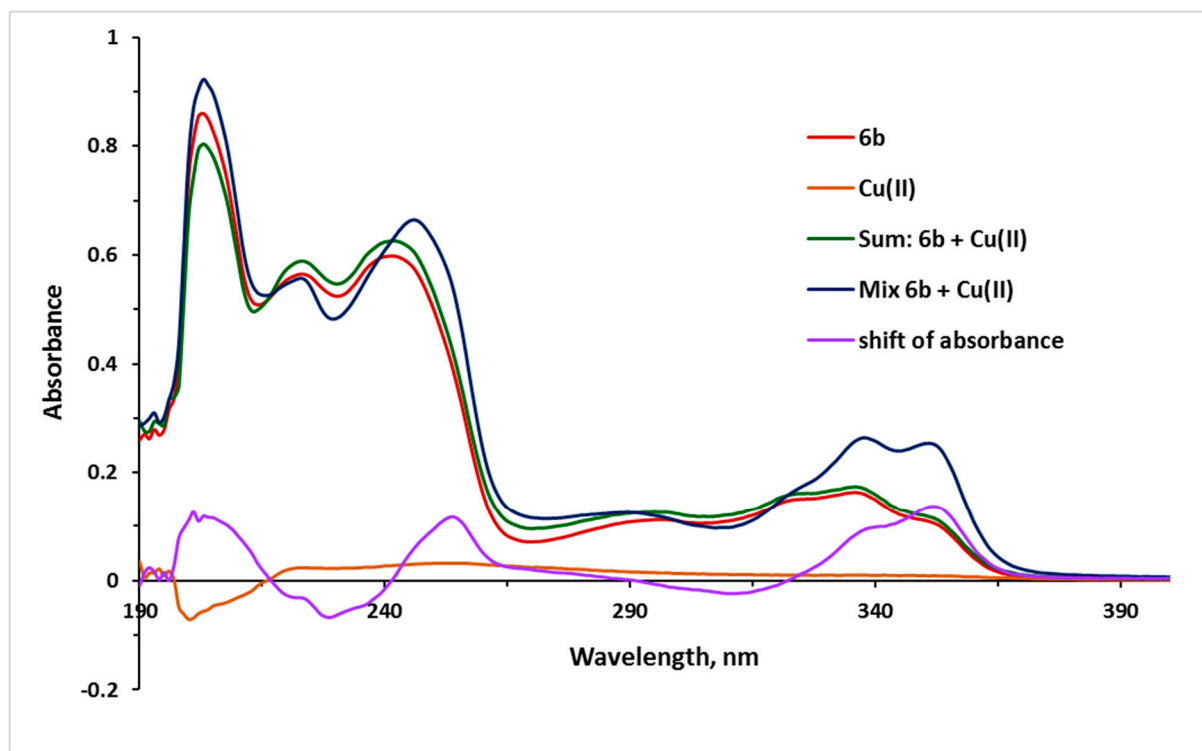

**Figure S53.** Absorption spectra of: compound **6b**,  $\text{Cu}^{2+}$  ions solution, a sum of **6b** and  $\text{Cu}^{2+}$ , their mixture, and the shift of the spectra caused by the formation of a complex.

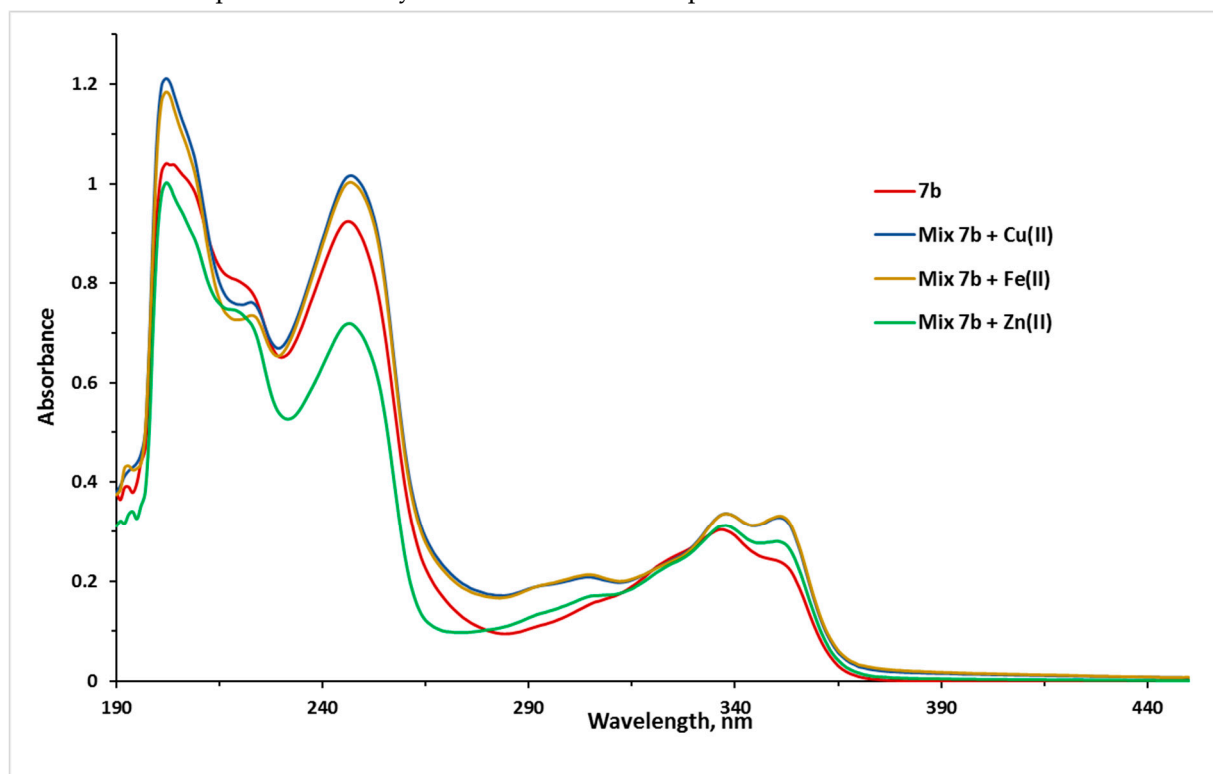

**Figure S54.** UV spectra of compound **7b** and mixture of **7b** with  $\text{Cu(II)}$ ,  $\text{Fe(II)}$  and  $\text{Zn(II)}$  ions.

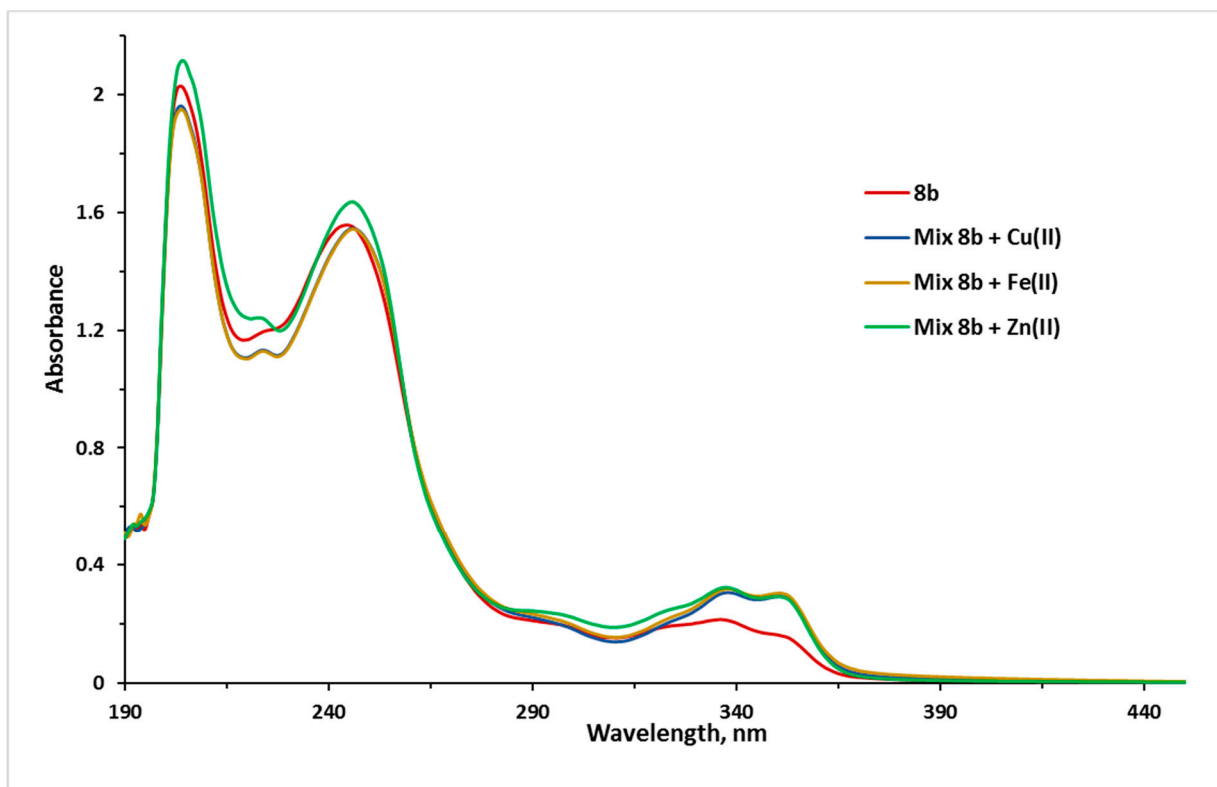

**Figure S55.** UV spectra of compound **8b** and mixture of **8b** with Cu(II), Fe(II) and Zn(II) ions.

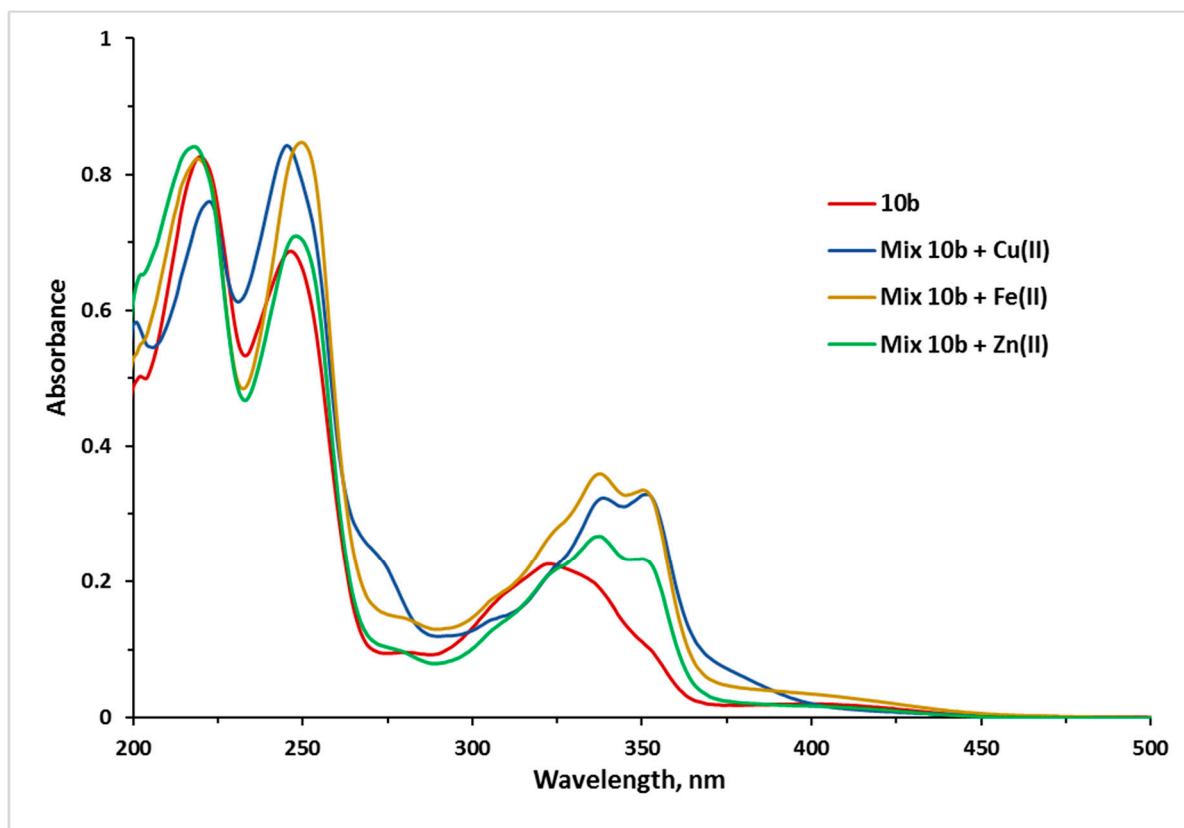

**Figure S56.** UV spectra of compound **10b** and mixture of **10b** with Cu(II), Fe(II) and Zn(II) ions.

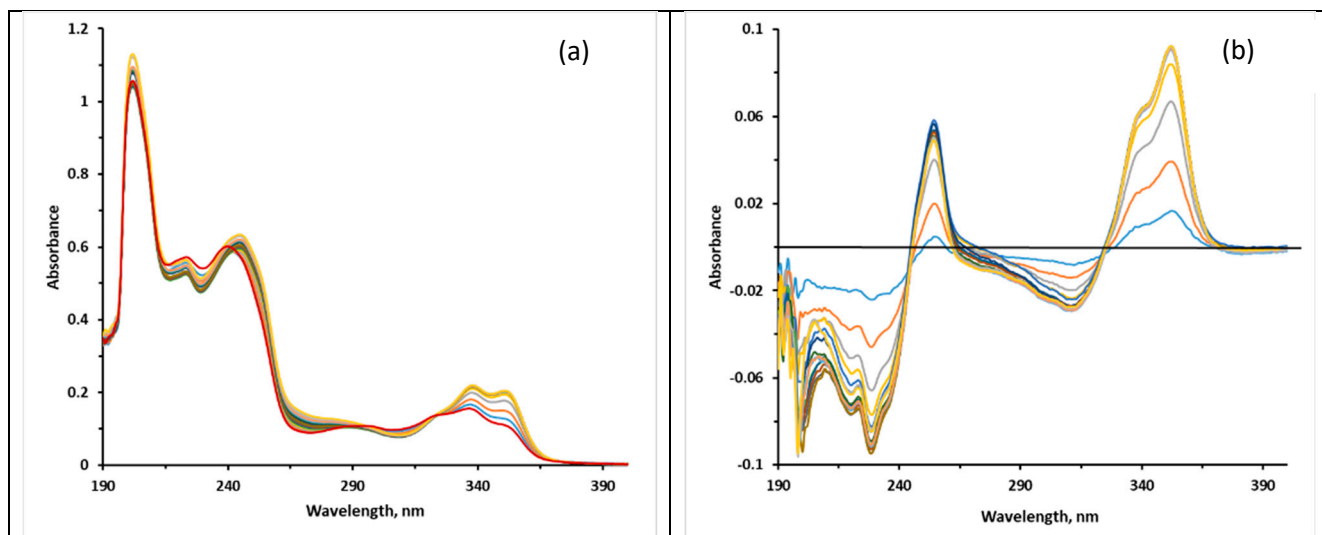

**Figure S57.** (a) UV absorption spectra of **6b** (20  $\mu\text{M}$ ) in ethanol after addition of increasing concentrations of  $\text{CuCl}_2$  (2-34  $\mu\text{M}$ ). (b) the differential spectra due to **6b**- $\text{Cu}^{2+}$  complex formation obtained by numerical subtraction from the spectra of the mixture of the spectra of the  $\text{Cu}^{2+}$  alone and **6b** alone at the corresponding concentrations.

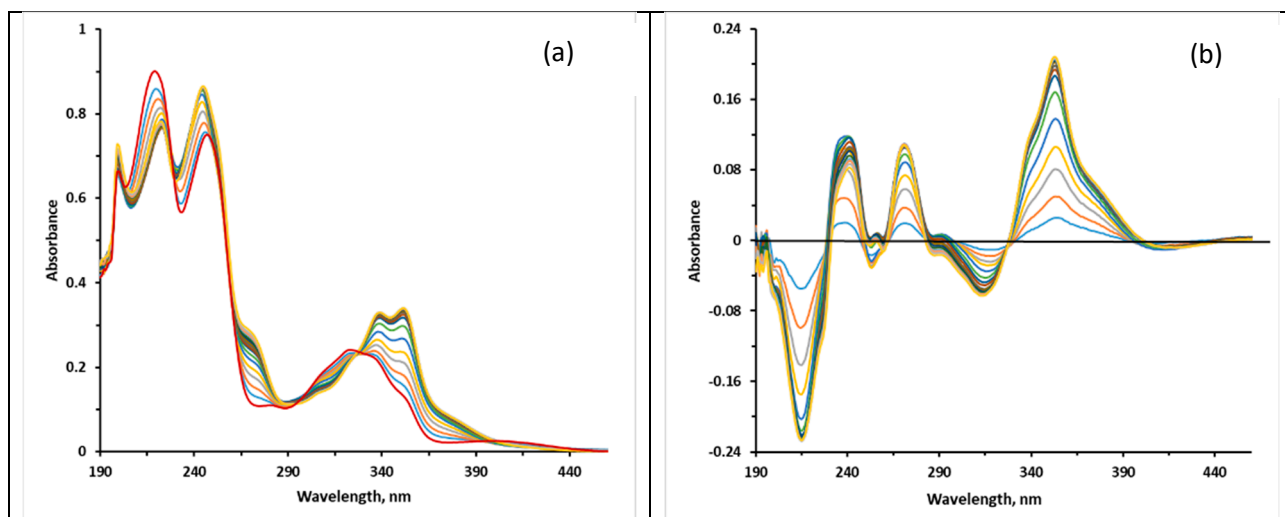

**Figure S58.** (a) UV absorption spectra of **10b** (20  $\mu\text{M}$ ) in ethanol after addition of increasing concentrations of  $\text{CuCl}_2$  (2-34  $\mu\text{M}$ ). (b) the differential spectra due to **10b**- $\text{Cu}^{2+}$  complex formation obtained by numerical subtraction from the spectra of the mixture of the spectra of the  $\text{Cu}^{2+}$  alone and **10b** alone at the corresponding concentrations.



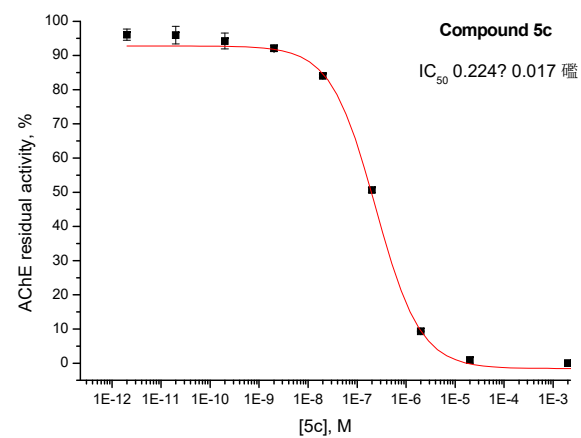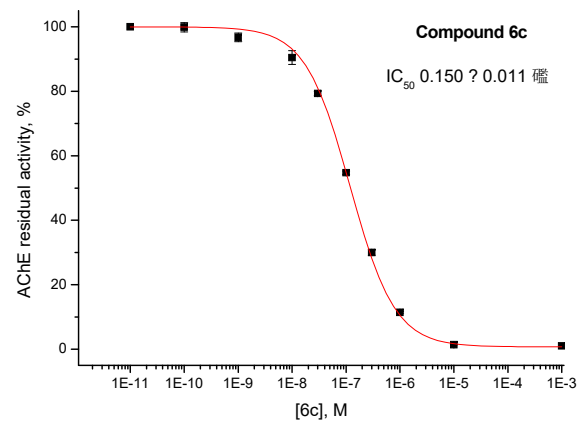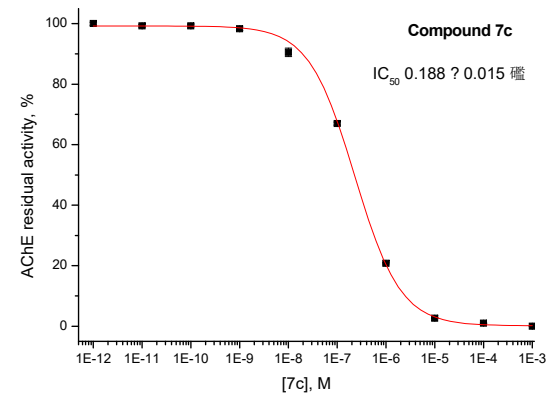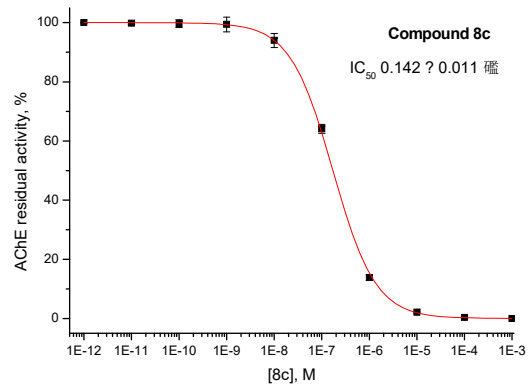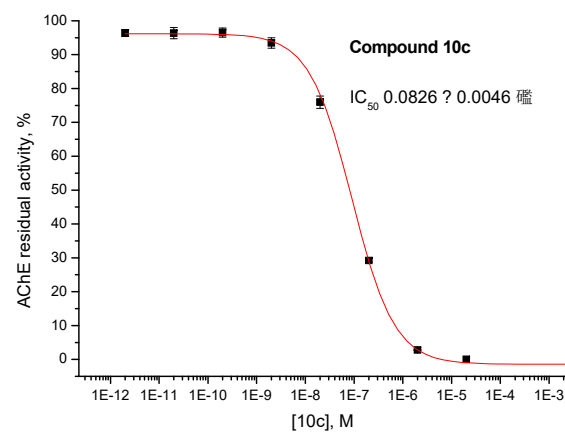

**Figure S59.** IC<sub>50</sub> values for AChE inhibition by compounds 5c, 6c, 7c, 8c and 10c (Mean ± SEM, n = 3)

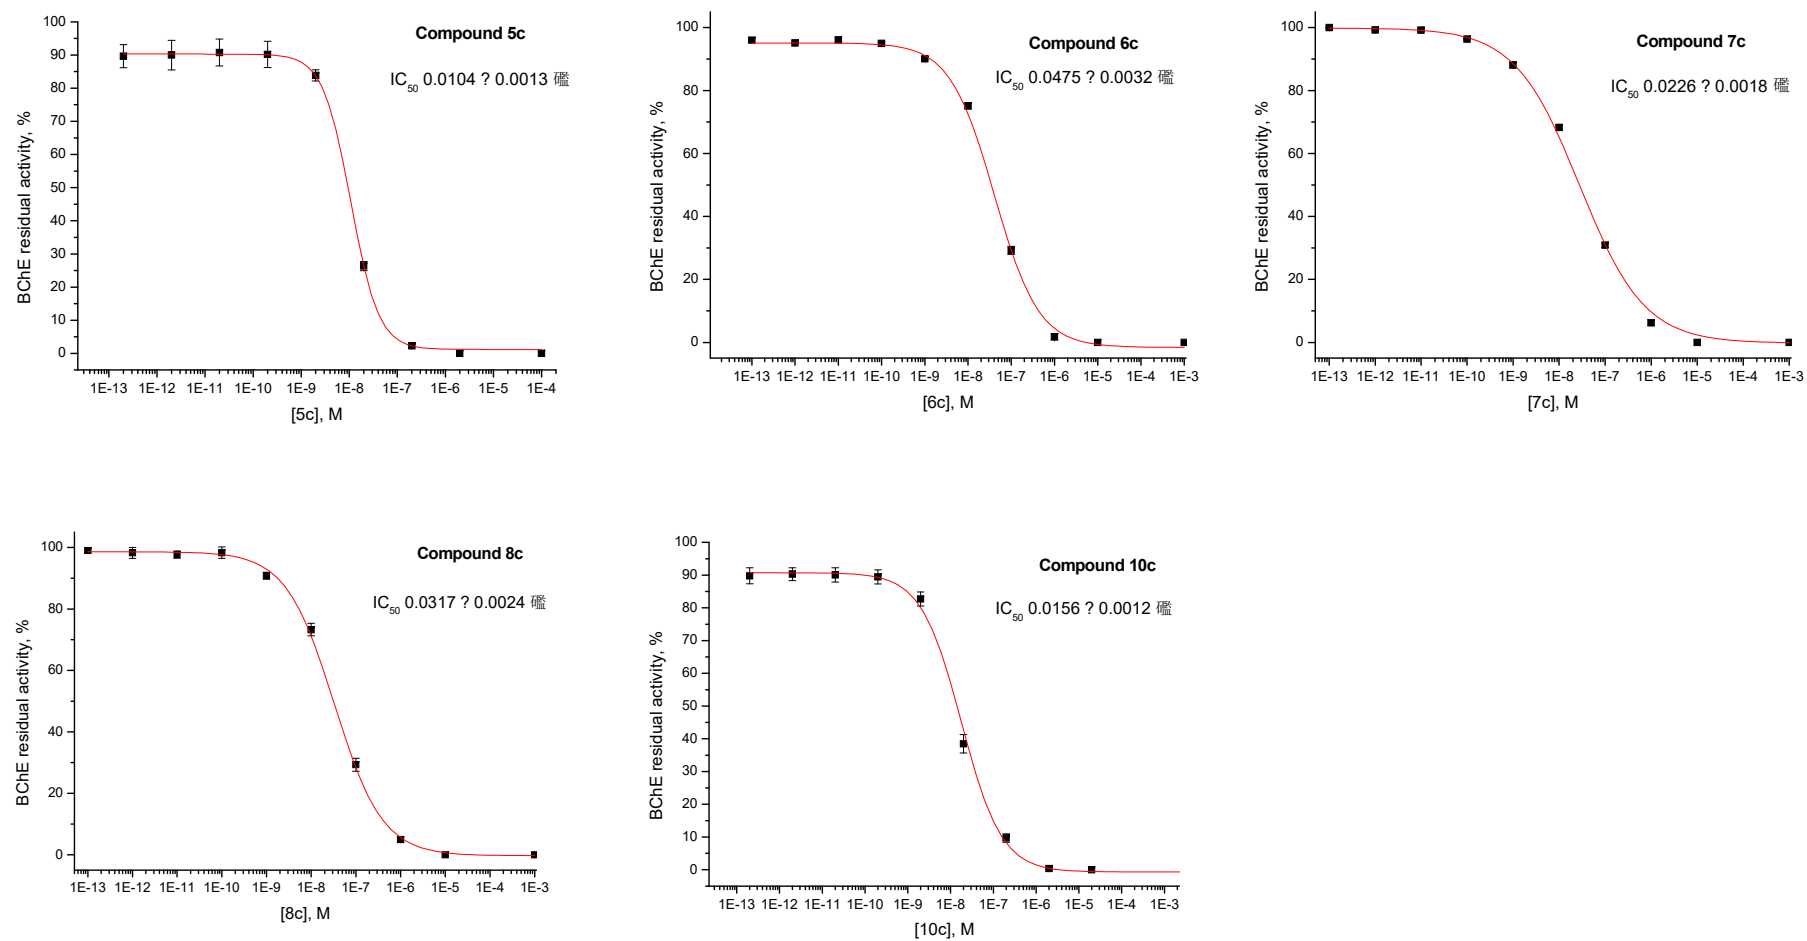

**Figure S60.**  $IC_{50}$  values for BChE inhibition by compounds 5c,6c,7c,8c and 10c (Mean  $\pm$  SEM, n = 3)

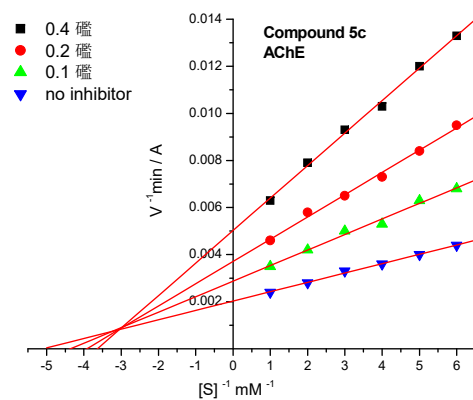

$$K_i = 0.152 \pm 0.012 \mu\text{M}$$

$$K_i' = 0.263 \pm 0.018 \mu\text{M}$$

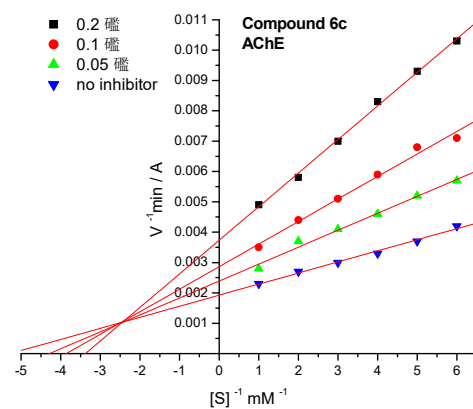

$$K_i = 0.104 \pm 0.004 \mu\text{M}$$

$$K_i' = 0.213 \pm 0.012 \mu\text{M}$$

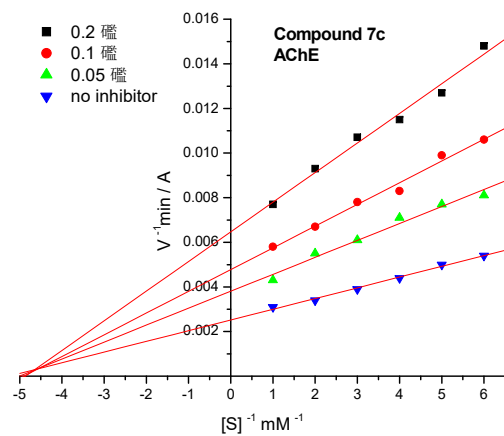

$$K_i = 0.125 \pm 0.003 \mu\text{M}$$

$$K_i' = 0.134 \pm 0.009 \mu\text{M}$$

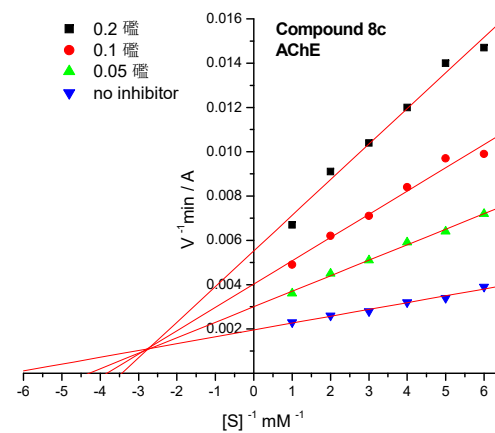

$$K_i = 0.0536 \pm 0.0025 \mu\text{M}$$

$$K_i' = 0.0998 \pm 0.0058 \mu\text{M}$$

**Figure S61.** Lineweaver-Burk double-reciprocal plots of steady state inhibition of AChE by compounds 5c,6c,7c,8c. Each plot indicates mixed-type inhibition.

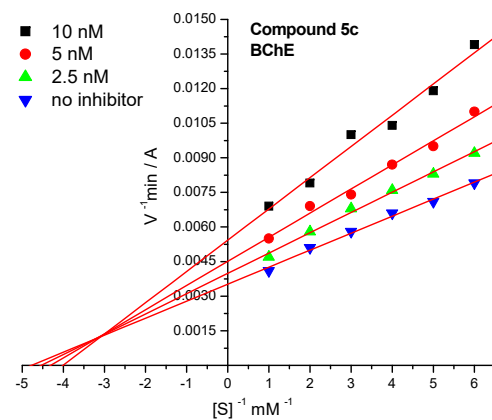

$$K_i = 0.0106 \pm 0.0007 \mu\text{M}$$

$$K_i' = 0.0171 \pm 0.0013 \mu\text{M}$$

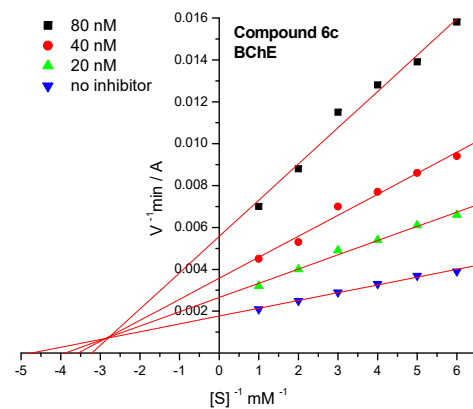

$$K_i = 0.0188 \pm 0.0011 \mu\text{M}$$

$$K_i' = 0.0314 \pm 0.0025 \mu\text{M}$$

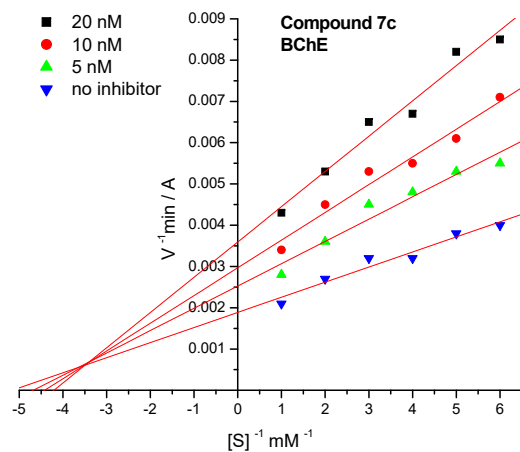

$$K_i = 0.0173 \pm 0.0006 \mu\text{M}$$

$$K_i' = 0.0243 \pm 0.0001 \mu\text{M}$$

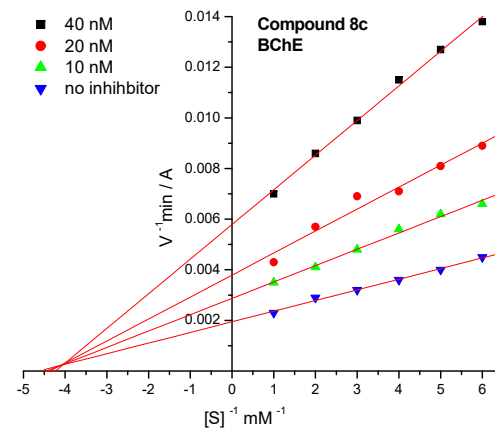

$$K_i = 0.0177 \pm 0.0007 \mu\text{M}$$

$$K_i' = 0.0187 \pm 0.0013 \mu\text{M}$$

**Figure S62.** Lineweaver-Burk double-reciprocal plots of steady state inhibition of BChE by compounds 5c,6c,7c,8c. Each plot indicates mixed-type inhibition.

**Table S1.** pKa values and charges of the investigated compounds.

| Compound   | Tacrine N | Spacer N | Ar-OH | Charge of<br>the Molecule |
|------------|-----------|----------|-------|---------------------------|
| <b>5a</b>  | 7.5       | -        | 8.3   | +1                        |
| <b>6a</b>  | 7.5       | -        | -     | +1                        |
| <b>7a</b>  | 7.5       | -        | 7.3   | +1                        |
| <b>10a</b> | 7.5       | 8.4      | 9     | +2                        |
